# Supplementary material
Source: PubMed Central journal article supplement (PMC7484192)

Supplemental Figure S1

**A** H3 Control RS vs. Caput

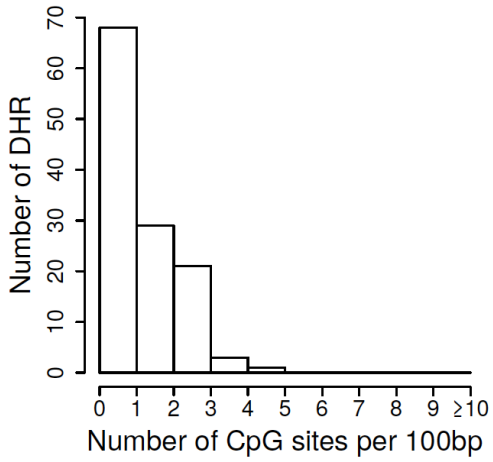

**B** H3 Control Caput vs. Cauda

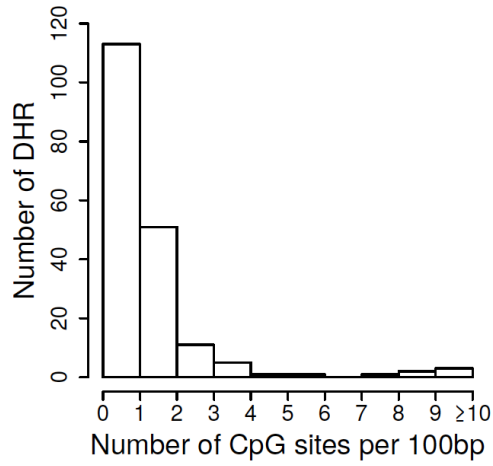

**C** H3 RS DDT

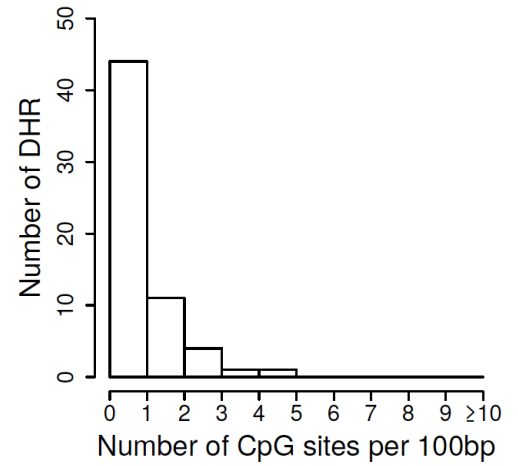

**D** H3 RS Vinclozolin

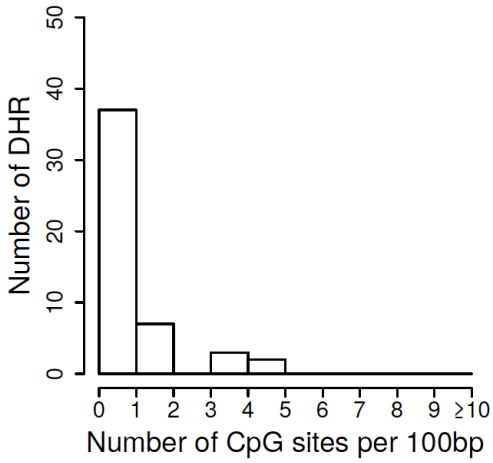

**E** H3 Caput DDT

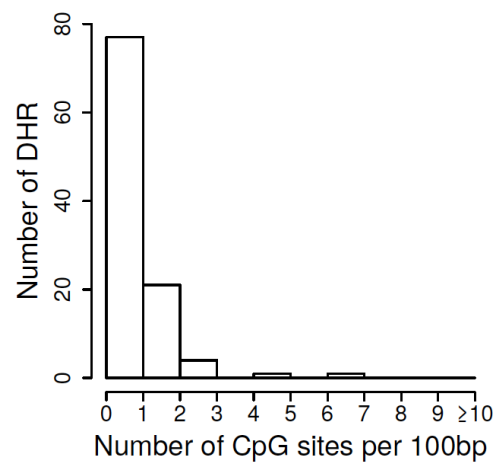

**F** H3 Caput Vinclozolin

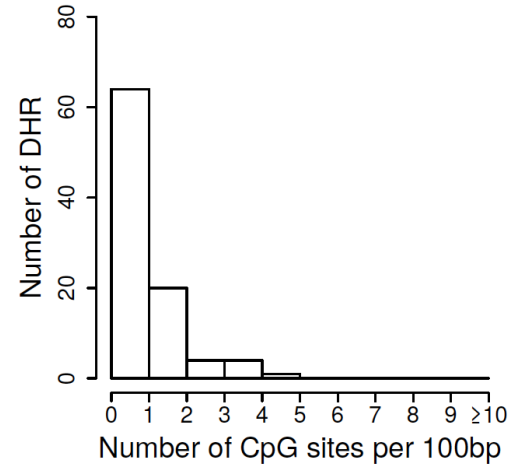

**G** H3 Cauda DDT

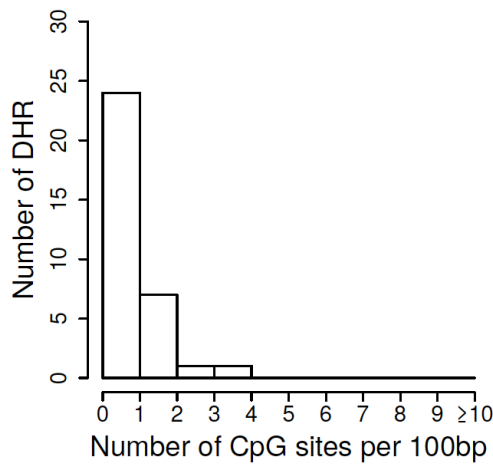

**H** H3 Cauda Vinclozolin

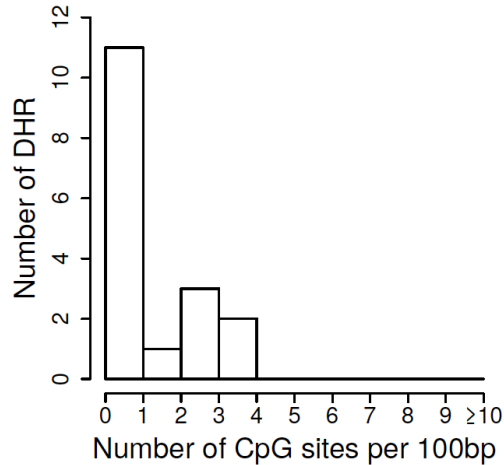

Supplement: NIHMS1614283-supplement-1.pdf [file NIHMS1614283-supplement-1.pdf]
