# Supplementary material
Source: PubMed Central journal article supplement (PMC7484192)

### Supplemental Figure S3

**A** H3K27me3 Control Caput vs. Cauda

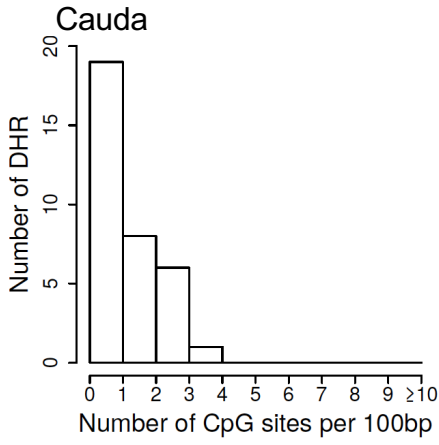

**B** H3K27me3 Control Caput vs. Cauda

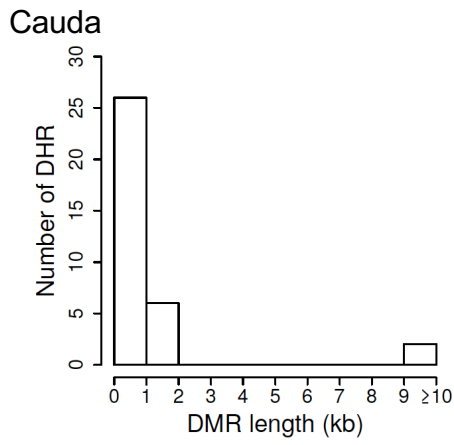

**C** H3K27me3 Caput DDT

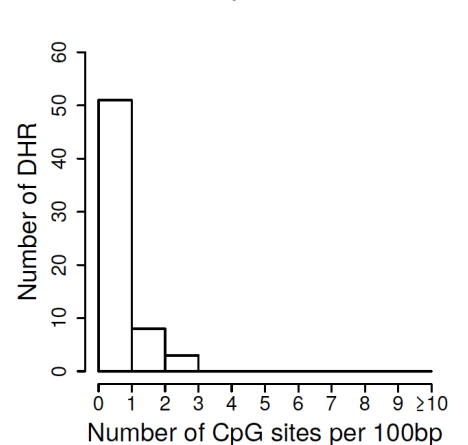

**D** H3K27me3 Caput DDT

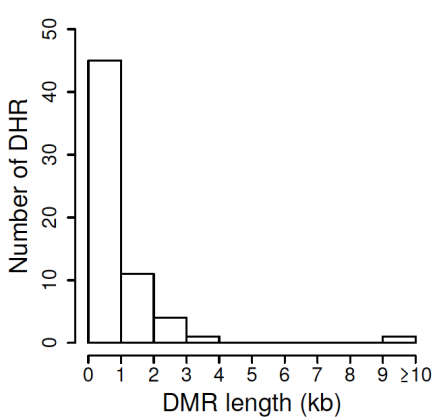

**E** H3K27me3 Cauda DDT

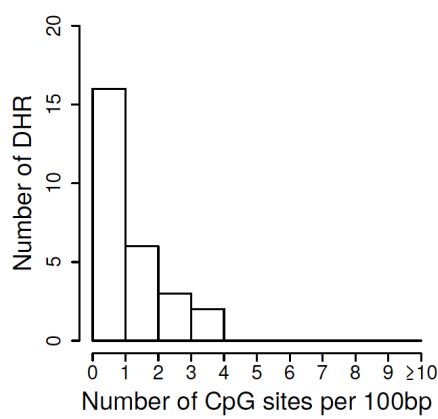

**F** H3K27me3 Cauda DDT

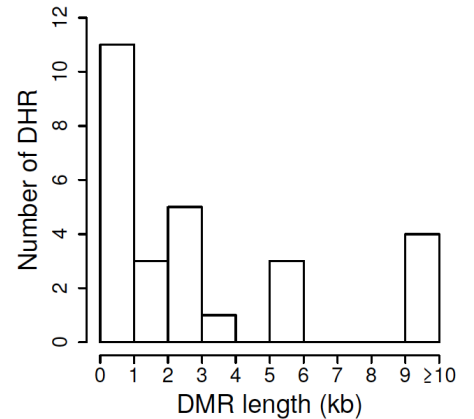

**G** H3K27me3 Caput Vinclozolin

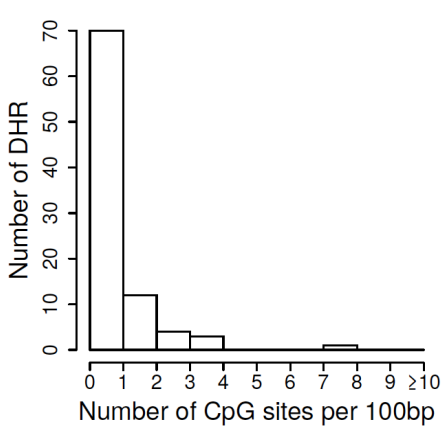

**H** H3K27me3 Caput Vinclozolin

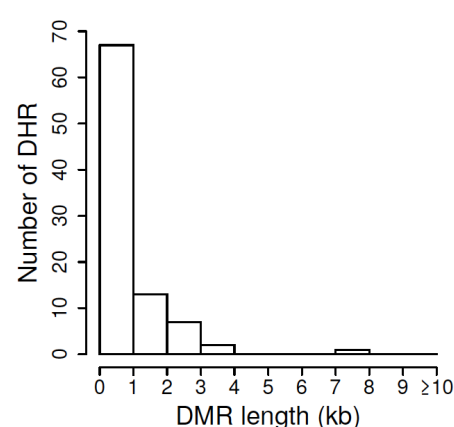

**I** H3K27me3 Cauda Vinclozolin

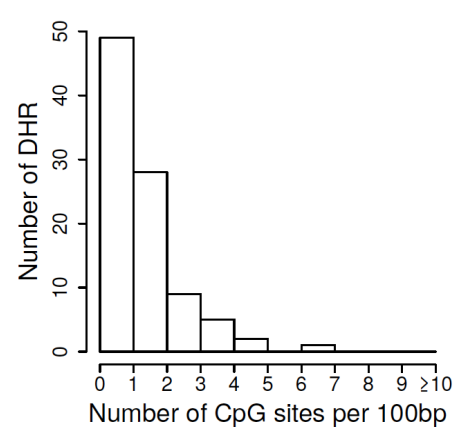

**J** H3K27me3 Cauda Vinclozolin

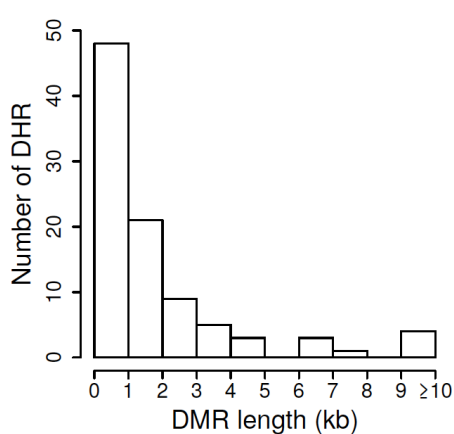

Supplement: NIHMS1614283-supplement-3.pdf [file NIHMS1614283-supplement-3.pdf]
