# Supplementary material
Source: PubMed Central journal article supplement (PMC7484192)
Supplement: NIHMS1614283-supplement-4.pdf [file NIHMS1614283-supplement-4.pdf]

Supplemental Figure S4

| p<0.05<br>p<1e-04                         | DDT RS     | DDT Caput  | DDT Cauda  | DDT H3K27me3 Caput | DDT H3K27me3 Cauda | Vin RS     | Vin Caput   | Vin Cauda  | Vin H3K27me3 Caput | Vin H3K27me3 Cauda | Control Caput vs. Cauda | Control RS vs. Caput | Control H3K27me3 Caput vs. H3K27me3 |
|-------------------------------------------|------------|------------|------------|--------------------|--------------------|------------|-------------|------------|--------------------|--------------------|-------------------------|----------------------|-------------------------------------|
| DDT RS                                    | 61 (100%)  | 25 (41.0%) | 17 (27.9%) | 14 (23.0%)         | 18 (29.5%)         | 35 (57.4%) | 21 (34.4%)  | 10 (16.4%) | 15 (24.6%)         | 9 (14.8%)          | 19 (31.1%)              | 35 (57.4%)           | 15 (24.6%)                          |
| DDT Caput                                 | 23 (22.1%) | 104 (100%) | 17 (16.3%) | 30 (28.8%)         | 15 (14.4%)         | 16 (15.4%) | 51 (49.0%)  | 13 (12.5%) | 29 (27.9%)         | 20 (19.2%)         | 37 (35.6%)              | 41 (39.4%)           | 21 (20.2%)                          |
| DDT Cauda                                 | 16 (48.5%) | 15 (45.5%) | 33 (100%)  | 13 (39.4%)         | 12 (36.4%)         | 13 (39.4%) | 14 (42.4%)  | 16 (48.5%) | 13 (39.4%)         | 10 (30.3%)         | 27 (81.8%)              | 10 (30.3%)           | 9 (27.3%)                           |
| DDT H3K27me3 Caput                        | 9 (14.5%)  | 17 (27.4%) | 8 (12.9%)  | 62 (100%)          | 6 (9.7%)           | 7 (11.3%)  | 14 (22.6%)  | 6 (9.7%)   | 45 (72.6%)         | 6 (9.7%)           | 12 (19.4%)              | 8 (12.9%)            | 12 (19.4%)                          |
| DDT H3K27me3 Cauda                        | 19 (70.4%) | 16 (59.3%) | 15 (55.6%) | 13 (48.1%)         | 27 (100%)          | 12 (44.4%) | 12 (44.4%)  | 15 (55.6%) | 14 (51.9%)         | 24 (88.9%)         | 13 (48.1%)              | 16 (59.3%)           | 13 (48.1%)                          |
| Vin RS                                    | 33 (67.3%) | 21 (42.9%) | 15 (30.6%) | 15 (30.6%)         | 14 (28.6%)         | 49 (100%)  | 22 (44.9%)  | 14 (28.6%) | 17 (34.7%)         | 15 (30.6%)         | 22 (44.9%)              | 30 (61.2%)           | 12 (24.5%)                          |
| Vin Caput                                 | 17 (18.3%) | 51 (54.8%) | 8 (8.6%)   | 31 (33.3%)         | 12 (12.9%)         | 21 (22.6%) | 93 (100%)   | 16 (17.2%) | 34 (36.6%)         | 19 (20.4%)         | 41 (44.1%)              | 40 (43.0%)           | 12 (12.9%)                          |
| Vin Cauda                                 | 7 (41.2%)  | 5 (29.4%)  | 7 (41.2%)  | 3 (17.6%)          | 4 (23.5%)          | 9 (52.9%)  | 7 (41.2%)   | 17 (100%)  | 8 (47.1%)          | 6 (35.3%)          | 7 (41.2%)               | 4 (23.5%)            | 2 (11.8%)                           |
| Vin H3K27me3 Caput                        | 9 (10.0%)  | 22 (24.4%) | 6 (6.7%)   | 43 (47.8%)         | 9 (10.0%)          | 22 (24.4%) | 30 (33.3%)  | 8 (8.9%)   | 90 (100%)          | 16 (17.8%)         | 14 (15.6%)              | 18 (20.0%)           | 24 (26.7%)                          |
| Vin H3K27me3 Cauda                        | 45 (47.9%) | 37 (39.4%) | 37 (39.4%) | 36 (38.3%)         | 67 (71.3%)         | 41 (43.6%) | 44 (46.8%)  | 42 (44.7%) | 43 (45.7%)         | 94 (100%)          | 48 (51.1%)              | 54 (57.4%)           | 49 (52.1%)                          |
| Control Caput vs. Cauda                   | 56 (29.8%) | 83 (44.1%) | 88 (46.8%) | 46 (24.5%)         | 40 (21.3%)         | 55 (29.3%) | 111 (59.0%) | 50 (26.6%) | 56 (29.8%)         | 52 (27.7%)         | 188 (100%)              | 93 (49.5%)           | 48 (25.5%)                          |
| Control RS vs. Caput                      | 59 (48.4%) | 41 (33.6%) | 22 (18.0%) | 25 (20.5%)         | 26 (21.3%)         | 46 (37.7%) | 62 (50.8%)  | 18 (14.8%) | 43 (35.2%)         | 32 (26.2%)         | 62 (50.8%)              | 122 (100%)           | 27 (22.1%)                          |
| Control H3K27me3 Caput vs. H3K27me3 Cauda | 7 (20.6%)  | 9 (26.5%)  | 7 (20.6%)  | 13 (38.2%)         | 12 (35.3%)         | 3 (8.8%)   | 6 (17.6%)   | 4 (11.8%)  | 16 (47.1%)         | 18 (52.9%)         | 8 (23.5%)               | 9 (26.5%)            | 34 (100%)                           |
