# Supplementary material
Source: PubMed Central journal article supplement (PMC7484192)
Supplement: NIHMS1614283-supplement-5.pdf [file NIHMS1614283-supplement-5.pdf]

## Supplemental Figure S5

### **Control Round Spermatid Caput 1e-04**

rno05163 Human cytomegalovirus infection (7)  
rno04144 Endocytosis (7)  
rno05166 Human T-cell leukemia virus 1 infection (7)  
rno04218 Cellular senescence (6)  
rno05330 Allograft rejection (6)  
rno04145 Phagosome (6)

### **DDT Round Spermatid 1e-04**

rno05332 Graft-versus-host disease (5)  
rno04514 Cell adhesion molecules (CAMs) (5)  
rno05330 Allograft rejection (5)  
rno04218 Cellular senescence (5)  
rno04144 Endocytosis (4)  
rno04145 Phagosome (4)  
rno04360 Axon guidance (3)  
rno04020 Calcium signaling pathway (3)

### **DDT Caput 1e-04**

rno04145 Phagosome (5)  
rno04218 Cellular senescence (4)  
rno04144 Endocytosis (4)  
rno04514 Cell adhesion molecules (CAMs) (4)

### **DDT H3K27me3 Caput 1e-04**

rno01100 Metabolic pathways (3)

### **Vinclozolin H3K27me3 Caput 1e-04**

rno01100 Metabolic pathways (4)  
rno00830 Retinol metabolism (3)  
rno00140 Steroid hormone biosynthesis (3)  
rno04740 Olfactory transduction (3)

### **Vinclozolin H3K27me3 Cauda 1e-04**

rno05332 Graft-versus-host disease (4)
