# Supplementary material
Source: PubMed Central journal article supplement (PMC7484192)
Supplement: NIHMS1614283-supplement-6.pdf [file NIHMS1614283-supplement-6.pdf]

**Supplemental Table S1**

**(A) Control Round Spermatid versus Caput Spermatozoa**

| DHR Name       | Chr | Start     | Stop      | Length | # Sig Win | minP     | maxLFC     | CpG # | CpG Density | Gene Annotation                                             | Gene Category |
|----------------|-----|-----------|-----------|--------|-----------|----------|------------|-------|-------------|-------------------------------------------------------------|---------------|
| DHR1:37271301  | 1   | 37271301  | 37272400  | 1100   | 1         | 4.40E-05 | -1.6622304 | 13    | 1.182       |                                                             |               |
| DHR1:37649901  | 1   | 37649901  | 37650300  | 400    | 1         | 4.64E-05 | -1.4234302 | 4     | 1           | Adcy2                                                       | Metabolism    |
| DHR1:56013601  | 1   | 56013601  | 56015600  | 2000   | 1         | 1.50E-07 | -1.0033171 | 6     | 0.3         |                                                             |               |
| DHR1:71521601  | 1   | 71521601  | 71523200  | 1600   | 1         | 6.55E-05 | 1.2174428  | 15    | 0.938       |                                                             |               |
| DHR1:94645801  | 1   | 94645801  | 94645900  | 100    | 1         | 4.23E-05 | 1.555803   | 0     | 0           |                                                             |               |
| DHR1:118351701 | 1   | 118351701 | 118351800 | 100    | 1         | 8.31E-05 | -1.6135107 | 2     | 2           |                                                             |               |
| DHR1:180262501 | 1   | 180262501 | 180263500 | 1000   | 1         | 4.24E-06 | -1.7071361 | 4     | 0.4         |                                                             |               |
| DHR1:180566401 | 1   | 180566401 | 180566900 | 500    | 1         | 8.32E-06 | -0.5266363 | 13    | 2.6         |                                                             |               |
| DHR1:180590001 | 1   | 180590001 | 180593300 | 3300   | 2         | 3.21E-06 | -0.5124366 | 82    | 2.485       |                                                             |               |
| DHR1:180971101 | 1   | 180971101 | 180974400 | 3300   | 1         | 3.25E-05 | -0.516829  | 84    | 2.545       |                                                             |               |
| DHR1:181001101 | 1   | 181001101 | 181001300 | 200    | 1         | 6.75E-05 | -0.4674367 | 4     | 2           |                                                             |               |
| DHR1:181166801 | 1   | 181166801 | 181173100 | 6300   | 3         | 7.97E-05 | -0.5324683 | 133   | 2.111       |                                                             |               |
| DHR1:181951901 | 1   | 181951901 | 181954700 | 2800   | 1         | 1.35E-05 | -0.5601125 | 67    | 2.393       |                                                             |               |
| DHR1:182785501 | 1   | 182785501 | 182786000 | 500    | 1         | 7.81E-05 | -1.3094467 | 3     | 0.6         |                                                             |               |
| DHR1:183167201 | 1   | 183167201 | 183167400 | 200    | 1         | 4.28E-05 | 2.2993068  | 2     | 1           |                                                             |               |
| DHR1:233696101 | 1   | 233696101 | 233696400 | 300    | 2         | 1.05E-06 | -2.2237598 | 2     | 0.667       |                                                             |               |
| DHR1:243283501 | 1   | 243283501 | 243283700 | 200    | 1         | 6.96E-05 | -2.0486178 | 1     | 0.5         | Kank1                                                       | Transcription |
| DHR2:936601    | 2   | 936601    | 937000    | 400    | 1         | 7.59E-05 | 2.5932673  | 6     | 1.5         |                                                             |               |
| DHR2:19295101  | 2   | 19295101  | 19295200  | 100    | 1         | 9.58E-05 | -2.1104217 | 0     | 0           |                                                             |               |
| DHR2:27655101  | 2   | 27655101  | 27655300  | 200    | 1         | 8.94E-05 | 2.3318674  | 2     | 1           | AABR07007769.1                                              |               |
| DHR2:49358101  | 2   | 49358101  | 49358500  | 400    | 1         | 3.53E-05 | -0.445616  | 12    | 3           |                                                             |               |
| DHR2:52811601  | 2   | 52811601  | 52812300  | 700    | 2         | 1.53E-05 | 2.4049216  | 8     | 1.143       |                                                             |               |
| DHR2:152817201 | 2   | 152817201 | 152817300 | 100    | 1         | 5.39E-06 | 2.4714619  | 1     | 1           | Dhx36                                                       | Transcription |
| DHR2:157009301 | 2   | 157009301 | 157009400 | 100    | 1         | 7.92E-05 | 1.3954776  | 0     | 0           |                                                             |               |
| DHR2:159614201 | 2   | 159614201 | 159614300 | 100    | 1         | 6.66E-05 | -1.5395603 | 0     | 0           |                                                             |               |
| DHR2:160933401 | 2   | 160933401 | 160934200 | 800    | 1         | 6.68E-05 | -0.4906549 | 5     | 0.625       |                                                             |               |
| DHR2:191936101 | 2   | 191936101 | 191936200 | 100    | 1         | 7.04E-05 | 2.4868526  | 0     | 0           |                                                             |               |
| DHR2:194992701 | 2   | 194992701 | 194993800 | 1100   | 1         | 2.80E-05 | 1.7680994  | 9     | 0.818       |                                                             |               |
| DHR2:196967701 | 2   | 196967701 | 196968500 | 800    | 1         | 9.08E-05 | 1.8417477  | 14    | 1.75        |                                                             |               |
| DHR2:198590101 | 2   | 198590101 | 198590400 | 300    | 3         | 2.51E-15 | -2.5533985 | 5     | 1.667       | AABR07012587.1;RF00003                                      |               |
| DHR2:244543401 | 2   | 244543401 | 244545500 | 2100   | 1         | 6.60E-05 | 1.6596354  | 41    | 1.952       | Stpg2;AABR07013566.1                                        | Development   |
| DHR2:249811401 | 2   | 249811401 | 249811600 | 200    | 1         | 9.99E-05 | -1.7575309 | 1     | 0.5         |                                                             |               |
| DHR3:133993701 | 3   | 133993701 | 134000100 | 6400   | 3         | 1.87E-07 | -0.5864564 | 162   | 2.531       |                                                             |               |
| DHR3:143918801 | 3   | 143918801 | 143919300 | 500    | 1         | 5.67E-06 | 2.2480705  | 7     | 1.4         |                                                             |               |
| DHR4:23599101  | 4   | 23599101  | 23599300  | 200    | 1         | 8.24E-06 | -1.6707214 | 2     | 1           |                                                             |               |
| DHR4:32794001  | 4   | 32794001  | 32794400  | 400    | 1         | 2.03E-05 | -1.724561  | 0     | 0           |                                                             |               |
| DHR4:60891201  | 4   | 60891201  | 60892400  | 1200   | 1         | 6.97E-05 | -1.8317507 | 12    | 1           | Exoc4                                                       | Transport     |
| DHR4:110673901 | 4   | 110673901 | 110674100 | 200    | 1         | 5.86E-05 | -1.4172613 | 1     | 0.5         |                                                             |               |
| DHR5:6372701   | 5   | 6372701   | 6374700   | 2000   | 20        | 9.27E-25 | -1.9633777 | 33    | 1.65        | AABR07046778.1                                              |               |
| DHR5:7071401   | 5   | 7071401   | 7071600   | 200    | 1         | 5.31E-05 | 1.8655893  | 9     | 4.5         | RGD1564053                                                  | Unknown       |
| DHR5:8922601   | 5   | 8922601   | 8922900   | 300    | 1         | 8.18E-05 | 1.2971805  | 0     | 0           | Ppp1r42                                                     |               |
| DHR5:71284301  | 5   | 71284301  | 71285700  | 1400   | 1         | 1.43E-05 | -1.4412076 | 10    | 0.714       |                                                             |               |
| DHR5:81779301  | 5   | 81779301  | 81779700  | 400    | 1         | 4.28E-05 | 2.3353792  | 7     | 1.75        | Astn2                                                       | Unknown       |
| DHR5:107519201 | 5   | 107519201 | 107519400 | 200    | 1         | 3.14E-05 | 2.5671817  | 1     | 0.5         |                                                             |               |
| DHR5:109807901 | 5   | 109807901 | 109808500 | 600    | 1         | 6.97E-05 | -1.9524592 | 4     | 0.667       |                                                             |               |
| DHR6:16282701  | 6   | 16282701  | 16283300  | 600    | 1         | 6.16E-05 | -1.6928117 | 1     | 0.167       |                                                             |               |
| DHR6:16522901  | 6   | 16522901  | 16523500  | 600    | 1         | 2.84E-05 | 2.2802785  | 3     | 0.5         |                                                             |               |
| DHR6:24137401  | 6   | 24137401  | 24137700  | 300    | 1         | 9.83E-06 | -2.0767765 | 0     | 0           |                                                             |               |
| DHR6:30437701  | 6   | 30437701  | 30438700  | 1000   | 1         | 1.53E-05 | 2.4384929  | 13    | 1.3         |                                                             |               |
| DHR6:30646201  | 6   | 30646201  | 30647000  | 800    | 2         | 5.57E-05 | -0.6847917 | 17    | 2.125       | AABR07063424.1;AABR07063425.3;AABR07063425.2;AABR07063425.1 |               |
| DHR6:57140401  | 6   | 57140401  | 57140600  | 200    | 1         | 7.11E-05 | 2.2623798  | 1     | 0.5         | Agmo                                                        | Metabolism    |

|                |    |           |           |      |    |          |            |     |       |                                                                                                          |                      |
|----------------|----|-----------|-----------|------|----|----------|------------|-----|-------|----------------------------------------------------------------------------------------------------------|----------------------|
| DHR6:60325001  | 6  | 60325001  | 60325200  | 200  | 1  | 5.97E-05 | 2.2660585  | 1   | 0.5   | Zfp277                                                                                                   | Transcription        |
| DHR6:75623701  | 6  | 75623701  | 75623800  | 100  | 1  | 2.57E-05 | 2.3354958  | 0   | 0     | RF00003;Snx6                                                                                             | Signaling            |
| DHR7:502901    | 7  | 502901    | 504300    | 1400 | 1  | 1.94E-05 | -0.7134326 | 5   | 0.357 |                                                                                                          |                      |
| DHR7:20468501  | 7  | 20468501  | 20469000  | 500  | 1  | 7.33E-05 | 1.8058291  | 4   | 0.8   | AABR07056118.1;AABR07056131.1                                                                            |                      |
| DHR7:23012901  | 7  | 23012901  | 23013500  | 600  | 1  | 9.01E-05 | 1.697966   | 11  | 1.833 | LOC300308                                                                                                |                      |
| DHR7:99337701  | 7  | 99337701  | 99338000  | 300  | 1  | 3.27E-05 | -1.6507923 | 2   | 0.667 |                                                                                                          |                      |
| DHR8:181101    | 8  | 181101    | 182400    | 1300 | 12 | 1.58E-27 | -2.0698362 | 27  | 2.077 |                                                                                                          |                      |
| DHR8:41149501  | 8  | 41149501  | 41150500  | 1000 | 1  | 9.11E-06 | 2.4385465  | 9   | 0.9   | AABR07069837.1;AABR07069840.1                                                                            |                      |
| DHR8:103539201 | 8  | 103539201 | 103539300 | 100  | 1  | 7.89E-05 | -1.4765045 | 0   | 0     | Trpc1                                                                                                    | Transport            |
| DHR9:8399201   | 9  | 8399201   | 8400600   | 1400 | 1  | 8.14E-05 | -1.9026455 | 11  | 0.786 | AABR07066379.1                                                                                           |                      |
| DHR9:9140001   | 9  | 9140001   | 9140600   | 600  | 1  | 8.25E-05 | 1.5133423  | 4   | 0.667 | MGC116197                                                                                                | Unknown              |
| DHR9:11660401  | 9  | 11660401  | 11663300  | 2900 | 1  | 1.58E-06 | -1.4537688 | 10  | 0.345 |                                                                                                          |                      |
| DHR9:21523201  | 9  | 21523201  | 21523500  | 300  | 1  | 7.35E-05 | -1.9283518 | 0   | 0     |                                                                                                          |                      |
| DHR9:21886501  | 9  | 21886501  | 21887300  | 800  | 1  | 8.38E-05 | -1.3634867 | 7   | 0.875 |                                                                                                          |                      |
| DHR9:21898701  | 9  | 21898701  | 21899000  | 300  | 1  | 1.55E-07 | -2.2241442 | 0   | 0     |                                                                                                          |                      |
| DHR9:37093901  | 9  | 37093901  | 37095100  | 1200 | 1  | 9.99E-05 | -1.7574248 | 14  | 1.167 | Phf3                                                                                                     |                      |
| DHR9:84864801  | 9  | 84864801  | 84865900  | 1100 | 1  | 1.58E-05 | 2.3710978  | 33  | 3     |                                                                                                          |                      |
| DHR9:121184301 | 9  | 121184301 | 121184400 | 100  | 1  | 4.96E-06 | 2.7066741  | 2   | 2     |                                                                                                          |                      |
| DHR10:419301   | 10 | 419301    | 419600    | 300  | 1  | 2.53E-05 | 2.2541637  | 3   | 1     |                                                                                                          |                      |
| DHR12:1508701  | 12 | 1508701   | 1510300   | 1600 | 4  | 5.74E-08 | -0.8805164 | 26  | 1.625 | RF00001;AABR07034940.2;Rn5s;AABR07034940.1                                                               |                      |
| DHR12:3628701  | 12 | 3628701   | 3628900   | 200  | 1  | 9.45E-05 | -0.580587  | 4   | 2     |                                                                                                          |                      |
| DHR12:10324001 | 12 | 10324001  | 10324200  | 200  | 1  | 3.87E-05 | -1.6641916 | 0   | 0     | Wasf3                                                                                                    | Cytoskeleton         |
| DHR13:33474001 | 13 | 33474001  | 33477500  | 3500 | 1  | 4.86E-05 | -0.463189  | 86  | 2.457 |                                                                                                          |                      |
| DHR13:33487601 | 13 | 33487601  | 33490200  | 2600 | 1  | 5.55E-05 | -0.6240052 | 67  | 2.577 |                                                                                                          |                      |
| DHR13:33719701 | 13 | 33719701  | 33720100  | 400  | 1  | 5.54E-05 | -0.4990704 | 10  | 2.5   |                                                                                                          |                      |
| DHR13:33755801 | 13 | 33755801  | 33756900  | 1100 | 1  | 9.97E-05 | -0.6816494 | 26  | 2.364 |                                                                                                          |                      |
| DHR14:28251501 | 14 | 28251501  | 28251700  | 200  | 1  | 7.11E-05 | 2.2991486  | 3   | 1.5   |                                                                                                          |                      |
| DHR14:46539801 | 14 | 46539801  | 46541000  | 1200 | 1  | 1.15E-05 | -0.8681338 | 25  | 2.083 |                                                                                                          |                      |
| DHR14:46591401 | 14 | 46591401  | 46596000  | 4600 | 1  | 4.23E-05 | -0.4439668 | 110 | 2.391 | AABR07015066.1;AABR07015067.1;AABR07015067.2                                                             |                      |
| DHR14:46600001 | 14 | 46600001  | 46600600  | 600  | 1  | 1.37E-05 | -0.5977175 | 16  | 2.667 | AABR07015067.1;AABR07015067.2                                                                            |                      |
| DHR14:46656401 | 14 | 46656401  | 46658800  | 2400 | 1  | 6.13E-05 | -0.6928819 | 52  | 2.167 | AABR07015078.1;AABR07015078.2;AABR07015079.1;AABR07015080.2;AABR07015081.2;AABR07015080.1;AABR07015081.1 |                      |
| DHR14:94324801 | 14 | 94324801  | 94327500  | 2700 | 1  | 1.89E-05 | 1.6539379  | 18  | 0.667 |                                                                                                          |                      |
| DHR14:94680201 | 14 | 94680201  | 94680300  | 100  | 1  | 1.28E-05 | -2.1808488 | 1   | 1     |                                                                                                          |                      |
| DHR14:94776701 | 14 | 94776701  | 94777000  | 300  | 2  | 1.63E-08 | -0.7114772 | 10  | 3.333 | AABR07016166.1                                                                                           |                      |
| DHR14:95093601 | 14 | 95093601  | 95093700  | 100  | 1  | 4.51E-05 | -1.9560092 | 2   | 2     |                                                                                                          |                      |
| DHR15:5255901  | 15 | 5255901   | 5256000   | 100  | 1  | 7.04E-05 | 2.4868244  | 1   | 1     | Cd99l2                                                                                                   | Extracellular Matrix |
| DHR15:5400901  | 15 | 5400901   | 5403300   | 2400 | 1  | 2.08E-05 | 1.5568406  | 24  | 1     |                                                                                                          |                      |
| DHR15:5788201  | 15 | 5788201   | 5790500   | 2300 | 1  | 7.47E-05 | 1.6153125  | 29  | 1.261 | LOC108348081;AABR07016992.1                                                                              |                      |
| DHR15:18004301 | 15 | 18004301  | 18004600  | 300  | 1  | 4.31E-05 | 1.8317199  | 1   | 0.333 |                                                                                                          |                      |
| DHR15:31495401 | 15 | 31495401  | 31496200  | 800  | 1  | 3.27E-05 | 1.8313095  | 1   | 0.125 | AABR07017825.5                                                                                           |                      |
| DHR15:42549801 | 15 | 42549801  | 42549900  | 100  | 1  | 7.04E-05 | 2.4868998  | 0   | 0     | Ccdc25                                                                                                   |                      |
| DHR15:49748201 | 15 | 49748201  | 49750900  | 2700 | 1  | 6.71E-05 | 2.1041093  | 29  | 1.074 |                                                                                                          |                      |
| DHR15:81231701 | 15 | 81231701  | 81232300  | 600  | 1  | 3.35E-05 | 1.9726939  | 13  | 2.167 |                                                                                                          |                      |
| DHR16:650301   | 16 | 650301    | 652600    | 2300 | 1  | 9.45E-05 | -1.1065057 | 11  | 0.478 |                                                                                                          |                      |
| DHR16:21640901 | 16 | 21640901  | 21641100  | 200  | 1  | 9.52E-05 | -1.4061016 | 1   | 0.5   |                                                                                                          |                      |
| DHR16:21776101 | 16 | 21776101  | 21776800  | 700  | 1  | 3.49E-05 | -0.8854366 | 7   | 1     | AABR07024907.1                                                                                           |                      |

|                |    |           |           |       |     |          |            |     |       |                                                                                                                                                                                                                                                                                                                                                                                      |               |
|----------------|----|-----------|-----------|-------|-----|----------|------------|-----|-------|--------------------------------------------------------------------------------------------------------------------------------------------------------------------------------------------------------------------------------------------------------------------------------------------------------------------------------------------------------------------------------------|---------------|
| DHR16:64458801 | 16 | 64458801  | 64459700  | 900   | 1   | 6.67E-05 | -1.8155484 | 11  | 1.222 |                                                                                                                                                                                                                                                                                                                                                                                      |               |
| DHR16:64934001 | 16 | 64934001  | 64935300  | 1300  | 1   | 2.32E-06 | -1.0314784 | 8   | 0.615 | AABR07026120.1                                                                                                                                                                                                                                                                                                                                                                       |               |
| DHR16:88956701 | 16 | 88956701  | 88956800  | 100   | 1   | 5.36E-05 | 2.3017838  | 2   | 2     |                                                                                                                                                                                                                                                                                                                                                                                      |               |
| DHR17:42053101 | 17 | 42053101  | 42054600  | 1500  | 1   | 1.53E-05 | -2.0010266 | 22  | 1.467 | Mrs2                                                                                                                                                                                                                                                                                                                                                                                 | Metabolism    |
| DHR17:44304401 | 17 | 44304401  | 44306000  | 1600  | 1   | 1.37E-05 | -0.5846451 | 41  | 2.562 |                                                                                                                                                                                                                                                                                                                                                                                      |               |
| DHR17:57783601 | 17 | 57783601  | 57786400  | 2800  | 1   | 6.00E-05 | 2.6977113  | 31  | 1.107 |                                                                                                                                                                                                                                                                                                                                                                                      |               |
| DHR17:57829701 | 17 | 57829701  | 57829800  | 100   | 1   | 4.95E-05 | 1.4968309  | 0   | 0     | AABR07028143.1                                                                                                                                                                                                                                                                                                                                                                       |               |
| DHR18:68399101 | 18 | 68399101  | 68399200  | 100   | 1   | 5.15E-05 | -1.9856506 | 1   | 1     | Ccdc68                                                                                                                                                                                                                                                                                                                                                                               |               |
| DHR18:85542201 | 18 | 85542201  | 85542500  | 300   | 1   | 8.31E-05 | -1.6136354 | 4   | 1.333 |                                                                                                                                                                                                                                                                                                                                                                                      |               |
| DHR18:88188701 | 18 | 88188701  | 88188800  | 100   | 1   | 2.88E-06 | -2.1796876 | 0   | 0     |                                                                                                                                                                                                                                                                                                                                                                                      |               |
| DHR19:210101   | 19 | 210101    | 212300    | 2200  | 1   | 4.76E-05 | 1.6568588  | 18  | 0.818 | LOC108348293                                                                                                                                                                                                                                                                                                                                                                         |               |
| DHR19:423701   | 19 | 423701    | 425900    | 2200  | 1   | 4.28E-05 | 2.3353479  | 19  | 0.864 | AABR07042629.1                                                                                                                                                                                                                                                                                                                                                                       |               |
| DHR19:26487101 | 19 | 26487101  | 26489000  | 1900  | 1   | 5.63E-05 | 1.3995067  | 15  | 0.789 |                                                                                                                                                                                                                                                                                                                                                                                      |               |
| DHR19:28226801 | 19 | 28226801  | 28230600  | 3800  | 1   | 3.81E-06 | 1.8263463  | 19  | 0.5   | AABR07043421.1                                                                                                                                                                                                                                                                                                                                                                       |               |
| DHR19:57975301 | 19 | 57975301  | 57975500  | 200   | 2   | 1.83E-09 | -3.4677102 | 6   | 3     | Disc1                                                                                                                                                                                                                                                                                                                                                                                |               |
| DHR20:4897001  | 20 | 4897001   | 4899300   | 2300  | 1   | 9.99E-05 | 2.0094935  | 29  | 1.261 | RT1-CE1;RT1-CE4;RT1-CE7;AABR07044408.1;RT1-CE5;AABR07044408.3                                                                                                                                                                                                                                                                                                                        | Immune        |
| DHR20:5366701  | 20 | 5366701   | 5366900   | 200   | 1   | 5.01E-05 | 1.6601379  | 2   | 1     | RT1-A1;RT1-A2                                                                                                                                                                                                                                                                                                                                                                        | Immune        |
| DHR20:19484001 | 20 | 19484001  | 19485800  | 1800  | 15  | 4.72E-21 | -3.3584221 | 22  | 1.222 | Fam13c                                                                                                                                                                                                                                                                                                                                                                               |               |
| DHR20:40882301 | 20 | 40882301  | 40883600  | 1300  | 1   | 9.20E-05 | 0.550579   | 42  | 3.231 |                                                                                                                                                                                                                                                                                                                                                                                      |               |
| DHRMT:1        | MT | 1         | 16313     | 16313 | 164 | 1.07E-54 | -2.0405289 | 303 | 1.857 | AY172581.13;AY172581.9;AY172581.3;AY172581.24;AY172581.14;Mt-nd1;AY172581.4;AY172581.21;AY172581.15;Mt-nd2;AY172581.6;AY172581.22;AY172581.18;AY172581.10;AY172581.7;Mt-co1;AY172581.19;AY172581.12;Mt-co2;AY172581.1;Mt-atp8;Mt-atp6;Mt-co3;AY172581.5;Mt-nd3;AY172581.16;Mt-nd4l;Mt-nd4;AY172581.23;AY172581.17;AY172581.11;Mt-nd5;Mt-nd6;AY172581.20;Mt-cyb;AY172581.8;AY172581.2 |               |
| DHRX:91801     | X  | 91801     | 94300     | 2500  | 1   | 3.43E-09 | -1.5659714 | 13  | 0.52  |                                                                                                                                                                                                                                                                                                                                                                                      |               |
| DHRX:73399601  | X  | 73399601  | 73401500  | 1900  | 12  | 1.38E-07 | -2.7078473 | 0   | 0     | Zfp449                                                                                                                                                                                                                                                                                                                                                                               | Transcription |
| DHRX:117450901 | X  | 117450901 | 117451700 | 800   | 1   | 5.88E-05 | -1.5041802 | 1   | 0.125 |                                                                                                                                                                                                                                                                                                                                                                                      |               |
| DHRX:159920101 | X  | 159920101 | 159920800 | 700   | 1   | 7.18E-06 | 2.5107059  | 6   | 0.857 |                                                                                                                                                                                                                                                                                                                                                                                      |               |
| DHRY:1467201   | Y  | 1467201   | 1467600   | 400   | 1   | 6.53E-05 | 1.9473017  | 15  | 3.75  |                                                                                                                                                                                                                                                                                                                                                                                      |               |

**(B) Control Caput versus Cauda**

| DHR Name       | Chr | Start     | Stop      | Length | # Sig Win | minP     | maxLFC     | CpG # | CpG Density | Gene Annotation                                                          | Gene Category |
|----------------|-----|-----------|-----------|--------|-----------|----------|------------|-------|-------------|--------------------------------------------------------------------------|---------------|
| DHR1:11904001  | 1   | 11904001  | 11920500  | 16500  | 3         | 1.05E-05 | -0.9763775 | 1467  | 8.891       | RF00002;RF01518                                                          |               |
|                |     |           |           |        |           |          |            |       |             | RF01518;AABR07000398.1;RF00002;AABR07000402.1;AABR07000404.1;LOC10090959 |               |
| DHR1:11957601  | 1   | 11957601  | 11975300  | 17700  | 2         | 3.61E-05 | -1.1072542 | 1546  | 8.734       | 9                                                                        |               |
| DHR1:24905001  | 1   | 24905001  | 24906500  | 1500   | 1         | 3.66E-05 | -2.0748207 | 9     | 0.6         | AABR07000740.2                                                           |               |
| DHR1:26287001  | 1   | 26287001  | 26288700  | 1700   | 1         | 1.19E-05 | -2.0691577 | 27    | 1.588       |                                                                          |               |
| DHR1:26875701  | 1   | 26875701  | 26875900  | 200    | 1         | 1.43E-05 | -2.1278118 | 3     | 1.5         |                                                                          |               |
| DHR1:37427001  | 1   | 37427001  | 37427800  | 800    | 1         | 3.40E-05 | -2.6687322 | 6     | 0.75        |                                                                          |               |
| DHR1:54206501  | 1   | 54206501  | 54210100  | 3600   | 1         | 9.08E-05 | -1.3895226 | 29    | 0.806       |                                                                          |               |
| DHR1:76262301  | 1   | 76262301  | 76262500  | 200    | 1         | 4.18E-05 | -2.8247304 | 1     | 0.5         | Sult2a2                                                                  | Metabolism    |
| DHR1:77223701  | 1   | 77223701  | 77225900  | 2200   | 1         | 7.79E-07 | -3.3147606 | 3     | 0.136       |                                                                          |               |
| DHR1:86811901  | 1   | 86811901  | 86812400  | 500    | 1         | 4.91E-05 | -0.8785013 | 3     | 0.6         | AABR07002845.1                                                           |               |
| DHR1:95728701  | 1   | 95728701  | 95729400  | 700    | 1         | 6.26E-06 | -3.2777554 | 7     | 1           |                                                                          |               |
| DHR1:95770701  | 1   | 95770701  | 95771000  | 300    | 1         | 6.98E-05 | -2.3046743 | 0     | 0           |                                                                          |               |
| DHR1:147363001 | 1   | 147363001 | 147363400 | 400    | 1         | 4.26E-05 | -2.2729142 | 1     | 0.25        |                                                                          |               |
| DHR1:152174901 | 1   | 152174901 | 152175300 | 400    | 1         | 1.44E-05 | 1.8629767  | 4     | 1           |                                                                          |               |
| DHR1:153058001 | 1   | 153058001 | 153058100 | 100    | 1         | 2.62E-05 | 2.287647   | 0     | 0           | Tmem135                                                                  | Unknown       |
| DHR1:160130201 | 1   | 160130201 | 160130500 | 300    | 1         | 9.90E-05 | 1.61003    | 5     | 1.667       | AABR07004833.1                                                           |               |
| DHR1:168733301 | 1   | 168733301 | 168733900 | 600    | 1         | 5.66E-06 | 1.9602636  | 3     | 0.5         | Olr115                                                                   |               |
| DHR1:179090801 | 1   | 179090801 | 179095300 | 4500   | 1         | 1.43E-05 | -2.1279327 | 44    | 0.978       |                                                                          |               |
| DHR1:179136701 | 1   | 179136701 | 179143000 | 6300   | 1         | 2.62E-05 | -1.4016688 | 43    | 0.683       |                                                                          |               |
| DHR1:179933801 | 1   | 179933801 | 179935100 | 1300   | 1         | 5.67E-05 | -1.640661  | 7     | 0.538       |                                                                          |               |
| DHR1:179936501 | 1   | 179936501 | 179939100 | 2600   | 1         | 5.30E-05 | -1.7743018 | 11    | 0.423       |                                                                          |               |
| DHR1:180858001 | 1   | 180858001 | 180860000 | 2000   | 1         | 4.95E-05 | 0.7191308  | 47    | 2.35        |                                                                          |               |
| DHR1:181412701 | 1   | 181412701 | 181415600 | 2900   | 1         | 3.97E-05 | -0.9383679 | 43    | 1.483       |                                                                          |               |
| DHR1:182406401 | 1   | 182406401 | 182407600 | 1200   | 1         | 1.47E-05 | -3.0117132 | 2     | 0.167       |                                                                          |               |
| DHR1:182967901 | 1   | 182967901 | 182968000 | 100    | 1         | 9.18E-05 | -2.0197174 | 0     | 0           |                                                                          |               |
| DHR1:195713501 | 1   | 195713501 | 195715300 | 1800   | 1         | 4.41E-05 | 1.0843938  | 8     | 0.444       |                                                                          |               |
| DHR1:212980301 | 1   | 212980301 | 212981100 | 800    | 1         | 3.91E-05 | -2.7515833 | 6     | 0.75        | Olr298                                                                   |               |
| DHR1:223749401 | 1   | 223749401 | 223750900 | 1500   | 1         | 5.47E-05 | -2.3072806 | 14    | 0.933       |                                                                          |               |
| DHR1:253407801 | 1   | 253407801 | 253408100 | 300    | 1         | 5.32E-05 | 1.6190855  | 2     | 0.667       |                                                                          |               |
| DHR2:1266701   | 2   | 1266701   | 1267200   | 500    | 1         | 9.47E-05 | -1.9505171 | 2     | 0.4         |                                                                          |               |
| DHR2:5733801   | 2   | 5733801   | 5734000   | 200    | 1         | 6.92E-05 | 2.1302549  | 2     | 1           |                                                                          |               |
| DHR2:21056201  | 2   | 21056201  | 21057200  | 1000   | 1         | 1.82E-05 | -2.1214912 | 13    | 1.3         |                                                                          |               |
| DHR2:49316201  | 2   | 49316201  | 49325000  | 8800   | 1         | 7.27E-06 | -1.7081442 | 280   | 3.182       |                                                                          |               |
| DHR2:53003301  | 2   | 53003301  | 53003900  | 600    | 1         | 1.88E-05 | 1.4709403  | 3     | 0.5         |                                                                          |               |
| DHR2:70637701  | 2   | 70637701  | 70638000  | 300    | 1         | 7.06E-05 | 1.6448843  | 3     | 1           |                                                                          |               |
| DHR2:78294801  | 2   | 78294801  | 78297100  | 2300   | 1         | 2.54E-05 | 1.9146706  | 17    | 0.739       |                                                                          |               |
| DHR2:114698401 | 2   | 114698401 | 114699300 | 900    | 1         | 8.23E-05 | -2.2601998 | 4     | 0.444       |                                                                          |               |
| DHR2:124031701 | 2   | 124031701 | 124032000 | 300    | 1         | 3.38E-05 | 1.6604377  | 0     | 0           |                                                                          |               |
| DHR2:130619601 | 2   | 130619601 | 130620000 | 400    | 1         | 6.98E-05 | 1.8725698  | 3     | 0.75        |                                                                          |               |
| DHR2:133205001 | 2   | 133205001 | 133206100 | 1100   | 1         | 2.30E-05 | 1.7752973  | 12    | 1.091       |                                                                          |               |
| DHR2:156111901 | 2   | 156111901 | 156112100 | 200    | 1         | 4.74E-05 | -2.3014406 | 2     | 1           |                                                                          |               |
| DHR2:156563001 | 2   | 156563001 | 156566800 | 3800   | 1         | 1.63E-05 | -1.9156578 | 58    | 1.526       |                                                                          |               |
| DHR2:159023701 | 2   | 159023701 | 159041600 | 17900  | 2         | 9.61E-06 | -1.272306  | 245   | 1.369       |                                                                          |               |
| DHR2:159241501 | 2   | 159241501 | 159241800 | 300    | 1         | 1.55E-05 | -2.1761834 | 2     | 0.667       |                                                                          |               |
| DHR2:159887801 | 2   | 159887801 | 159888000 | 200    | 1         | 1.05E-08 | -4.3231903 | 4     | 2           |                                                                          |               |
| DHR2:160770001 | 2   | 160770001 | 160771400 | 1400   | 1         | 5.72E-05 | -2.0102717 | 18    | 1.286       |                                                                          |               |
| DHR2:160935501 | 2   | 160935501 | 160936900 | 1400   | 1         | 4.81E-05 | -1.8284273 | 23    | 1.643       |                                                                          |               |
| DHR2:161071401 | 2   | 161071401 | 161071800 | 400    | 1         | 2.62E-05 | -2.5492176 | 4     | 1           |                                                                          |               |
| DHR2:161490501 | 2   | 161490501 | 161490800 | 300    | 1         | 6.62E-05 | -1.1651501 | 2     | 0.667       |                                                                          |               |
| DHR2:161610701 | 2   | 161610701 | 161611400 | 700    | 1         | 3.54E-05 | -1.2368948 | 2     | 0.286       |                                                                          |               |
| DHR2:162544301 | 2   | 162544301 | 162544700 | 400    | 1         | 7.86E-06 | -2.4658441 | 3     | 0.75        |                                                                          |               |

|                |   |           |           |       |   |          |            |      |        |                                        |               |
|----------------|---|-----------|-----------|-------|---|----------|------------|------|--------|----------------------------------------|---------------|
| DHR2:163345901 | 2 | 163345901 | 163346200 | 300   | 1 | 4.79E-05 | -2.7483371 | 5    | 1.667  | AABR07011545.1                         |               |
| DHR2:179506301 | 2 | 179506301 | 179506400 | 100   | 1 | 1.90E-05 | -2.8936993 | 2    | 2      |                                        |               |
| DHR2:196967601 | 2 | 196967601 | 196968000 | 400   | 1 | 7.69E-05 | -1.7816017 | 3    | 0.75   |                                        |               |
| DHR2:197138101 | 2 | 197138101 | 197140000 | 1900  | 1 | 7.23E-05 | -1.1251469 | 55   | 2.895  |                                        |               |
| DHR2:201702201 | 2 | 201702201 | 201705600 | 3400  | 1 | 8.17E-05 | -1.7168038 | 28   | 0.824  |                                        |               |
| DHR2:262620101 | 2 | 262620101 | 262620300 | 200   | 1 | 5.74E-06 | 2.0468625  | 1    | 0.5    |                                        |               |
| DHR3:17867601  | 3 | 17867601  | 17867700  | 100   | 1 | 5.32E-05 | 1.618986   | 1    | 1      |                                        |               |
| DHR3:47892601  | 3 | 47892601  | 47892700  | 100   | 1 | 6.98E-05 | 1.8724662  | 2    | 2      |                                        |               |
| DHR3:96283801  | 3 | 96283801  | 96284500  | 700   | 1 | 6.98E-05 | -2.2725342 | 9    | 1.286  |                                        |               |
| DHR3:96759501  | 3 | 96759501  | 96760200  | 700   | 1 | 2.29E-05 | -2.1332728 | 10   | 1.429  |                                        |               |
| DHR3:133560501 | 3 | 133560501 | 133568600 | 8100  | 2 | 4.84E-07 | -0.8323417 | 107  | 1.321  |                                        |               |
| DHR3:169271601 | 3 | 169271601 | 169271800 | 200   | 1 | 6.29E-05 | -1.6290544 | 3    | 1.5    |                                        |               |
| DHR3:169432201 | 3 | 169432201 | 169434900 | 2700  | 1 | 8.56E-05 | -2.3586996 | 28   | 1.037  |                                        |               |
| DHR4:20863701  | 4 | 20863701  | 20863800  | 100   | 1 | 1.45E-05 | 1.9868593  | 0    | 0      |                                        |               |
| DHR4:33208001  | 4 | 33208001  | 33212700  | 4700  | 2 | 3.66E-05 | -2.047632  | 28   | 0.596  | AABR07059723.1                         |               |
| DHR4:33591501  | 4 | 33591501  | 33592400  | 900   | 2 | 5.39E-07 | 1.9214181  | 7    | 0.778  |                                        |               |
| DHR4:129358201 | 4 | 129358201 | 129358400 | 200   | 1 | 4.13E-05 | 1.8678284  | 3    | 1.5    | Fam19a4                                |               |
| DHR4:146538701 | 4 | 146538701 | 146543600 | 4900  | 2 | 2.98E-05 | 0.5447802  | 147  | 3      |                                        |               |
| DHR4:146545701 | 4 | 146545701 | 146548800 | 3100  | 1 | 5.18E-05 | 0.4774839  | 93   | 3      |                                        |               |
| DHR4:172584001 | 4 | 172584001 | 172584600 | 600   | 1 | 6.88E-05 | 1.5252091  | 5    | 0.833  |                                        |               |
| DHR5:16400901  | 5 | 16400901  | 16401100  | 200   | 1 | 6.98E-05 | 1.8726224  | 0    | 0      | Tmem68                                 | Unknown       |
| DHR5:36846601  | 5 | 36846601  | 36847000  | 400   | 1 | 7.78E-05 | 1.6599442  | 6    | 1.5    |                                        |               |
| DHR5:38275501  | 5 | 38275501  | 38275700  | 200   | 1 | 2.85E-05 | 2.2506691  | 3    | 1.5    |                                        |               |
| DHR5:39607001  | 5 | 39607001  | 39607100  | 100   | 1 | 9.12E-05 | 1.4794666  | 0    | 0      | Fhl5;Ufl1                              | Transcription |
| DHR5:85718901  | 5 | 85718901  | 85719000  | 100   | 1 | 5.66E-06 | 2.0633327  | 0    | 0      |                                        |               |
| DHR5:91123901  | 5 | 91123901  | 91137700  | 13800 | 3 | 1.08E-06 | -1.3280459 | 1568 | 11.362 | RF01518;RF00002;AABR07048791.1         |               |
| DHR5:96304601  | 5 | 96304601  | 96306900  | 2300  | 1 | 3.57E-06 | 1.6543192  | 28   | 1.217  |                                        |               |
| DHR5:97239501  | 5 | 97239501  | 97239800  | 300   | 1 | 8.12E-05 | 1.9833457  | 2    | 0.667  |                                        |               |
| DHR5:121162701 | 5 | 121162701 | 121163400 | 700   | 1 | 6.68E-05 | -2.1162169 | 9    | 1.286  |                                        |               |
| DHR6:16259201  | 6 | 16259201  | 16261600  | 2400  | 1 | 2.94E-05 | -1.7611726 | 11   | 0.458  |                                        |               |
| DHR6:16551701  | 6 | 16551701  | 16551900  | 200   | 1 | 4.26E-05 | -2.2729308 | 1    | 0.5    |                                        |               |
| DHR6:16846201  | 6 | 16846201  | 16846900  | 700   | 1 | 9.24E-05 | -2.3242063 | 4    | 0.571  |                                        |               |
| DHR6:30436201  | 6 | 30436201  | 30436900  | 700   | 1 | 3.95E-06 | -2.302091  | 9    | 1.286  |                                        |               |
| DHR6:31064801  | 6 | 31064801  | 31070900  | 6100  | 1 | 6.02E-05 | -1.0090723 | 110  | 1.803  |                                        |               |
| DHR6:54052801  | 6 | 54052801  | 54053000  | 200   | 1 | 5.14E-05 | 2.0425498  | 2    | 1      | Hdac9                                  |               |
| DHR6:58851201  | 6 | 58851201  | 58852000  | 800   | 1 | 3.45E-06 | 2.1302705  | 7    | 0.875  |                                        |               |
| DHR6:125451301 | 6 | 125451301 | 125451600 | 300   | 1 | 6.30E-05 | 0.6083593  | 10   | 3.333  | Tc2n                                   | Unknown       |
| DHR7:230301    | 7 | 230301    | 230500    | 200   | 1 | 6.28E-05 | -2.1759135 | 1    | 0.5    |                                        |               |
| DHR7:21655601  | 7 | 21655601  | 21657700  | 2100  | 1 | 8.71E-05 | -1.6926849 | 32   | 1.524  |                                        |               |
| DHR7:22571901  | 7 | 22571901  | 22572000  | 100   | 1 | 7.05E-05 | -2.4040363 | 0    | 0      |                                        |               |
| DHR7:87937001  | 7 | 87937001  | 87937900  | 900   | 1 | 2.47E-05 | -2.4753801 | 16   | 1.778  | AABR07057765.1                         |               |
| DHR7:99350501  | 7 | 99350501  | 99350600  | 100   | 1 | 3.43E-05 | -2.4182926 | 0    | 0      |                                        |               |
| DHR7:100303401 | 7 | 100303401 | 100305700 | 2300  | 1 | 4.01E-05 | 0.5922911  | 64   | 2.783  |                                        |               |
| DHR8:11928201  | 8 | 11928201  | 11928300  | 100   | 1 | 5.80E-05 | -2.722215  | 0    | 0      | Ccdc82;Maml2                           | Transcription |
| DHR8:18890001  | 8 | 18890001  | 18890300  | 300   | 1 | 4.26E-05 | 1.9227436  | 0    | 0      |                                        |               |
| DHR8:96952201  | 8 | 96952201  | 96953100  | 900   | 1 | 8.63E-05 | 1.828928   | 6    | 0.667  |                                        |               |
| DHR8:112344801 | 8 | 112344801 | 112345700 | 900   | 1 | 3.81E-05 | -2.0745537 | 7    | 0.778  |                                        |               |
| DHR8:120953001 | 8 | 120953001 | 120953400 | 400   | 1 | 8.33E-05 | 1.7750481  | 5    | 1.25   |                                        |               |
| DHR9:2005601   | 9 | 2005601   | 2005700   | 100   | 1 | 6.28E-05 | -2.2047211 | 2    | 2      |                                        |               |
| DHR9:4001701   | 9 | 4001701   | 4005000   | 3300  | 1 | 1.02E-05 | -2.2725173 | 9    | 0.273  |                                        |               |
| DHR9:4104001   | 9 | 4104001   | 4104500   | 500   | 1 | 3.37E-05 | -1.9912348 | 5    | 1      | LOC100910057;RGD1562392;AABR07066160.1 | Metabolism    |
| DHR9:11480201  | 9 | 11480201  | 11480500  | 300   | 1 | 3.52E-06 | -3.3507576 | 6    | 2      |                                        |               |
| DHR9:11705301  | 9 | 11705301  | 11706500  | 1200  | 1 | 2.54E-05 | -2.1758035 | 6    | 0.5    |                                        |               |
| DHR9:12467401  | 9 | 12467401  | 12469500  | 2100  | 1 | 9.54E-05 | -0.9825045 | 12   | 0.571  | AABR07066700.1                         |               |
| DHR9:21903201  | 9 | 21903201  | 21905000  | 1800  | 1 | 3.66E-05 | -2.0476487 | 13   | 0.722  |                                        |               |

|                 |    |           |           |      |   |          |            |     |        |                                              |            |
|-----------------|----|-----------|-----------|------|---|----------|------------|-----|--------|----------------------------------------------|------------|
| DHR9:22760401   | 9  | 22760401  | 22760500  | 100  | 1 | 2.73E-05 | 2.0178746  | 0   | 0      |                                              |            |
| DHR9:75401701   | 9  | 75401701  | 75401900  | 200  | 1 | 2.58E-09 | 1.820571   | 0   | 0      | ErbB4                                        | Signaling  |
| DHR9:76420401   | 9  | 76420401  | 76420900  | 500  | 1 | 9.43E-06 | 2.0180447  | 8   | 1.6    |                                              |            |
| DHR9:103429101  | 9  | 103429101 | 103429300 | 200  | 1 | 1.55E-05 | 1.863805   | 3   | 1.5    |                                              |            |
| DHR10:112502101 | 10 | 112502101 | 112503200 | 1100 | 1 | 6.91E-05 | 1.4441902  | 3   | 0.273  |                                              |            |
| DHR11:7067801   | 11 | 7067801   | 7067900   | 100  | 1 | 5.00E-05 | 2.182874   | 0   | 0      |                                              |            |
| DHR11:16170401  | 11 | 16170401  | 16171100  | 700  | 1 | 1.54E-05 | 2.1543088  | 3   | 0.429  |                                              |            |
| DHR11:29747401  | 11 | 29747401  | 29748500  | 1100 | 1 | 3.47E-06 | 1.8571647  | 10  | 0.909  |                                              |            |
| DHR11:36816801  | 11 | 36816801  | 36817000  | 200  | 1 | 5.11E-05 | 1.8170751  | 1   | 0.5    |                                              |            |
| DHR11:60753901  | 11 | 60753901  | 60754300  | 400  | 1 | 5.81E-05 | 1.6523631  | 5   | 1.25   |                                              |            |
| DHR12:35676901  | 12 | 35676901  | 35677400  | 500  | 1 | 8.07E-05 | -2.49025   | 8   | 1.6    |                                              |            |
| DHR13:19383601  | 13 | 19383601  | 19388100  | 4500 | 1 | 1.60E-06 | -1.4411695 | 34  | 0.756  |                                              |            |
| DHR13:27983501  | 13 | 27983501  | 27983600  | 100  | 1 | 2.80E-05 | 2.0381609  | 1   | 1      |                                              |            |
| DHR13:32647101  | 13 | 32647101  | 32647600  | 500  | 1 | 9.42E-05 | 1.8785531  | 1   | 0.2    |                                              |            |
| DHR14:4887501   | 14 | 4887501   | 4887700   | 200  | 1 | 9.91E-05 | 1.9827426  | 5   | 2.5    |                                              |            |
| DHR14:21680201  | 14 | 21680201  | 21684300  | 4100 | 1 | 5.66E-05 | 1.6951515  | 17  | 0.415  | Smr3b                                        |            |
| DHR14:22059201  | 14 | 22059201  | 22064500  | 5300 | 1 | 5.36E-05 | 1.3822103  | 25  | 0.472  | Sult1e1                                      | Metabolism |
| DHR14:46547801  | 14 | 46547801  | 46555400  | 7600 | 1 | 1.42E-05 | -1.0609466 | 128 | 1.684  |                                              |            |
| DHR14:46564901  | 14 | 46564901  | 46566800  | 1900 | 2 | 1.18E-05 | -1.0518517 | 113 | 5.947  | RF01518                                      |            |
| DHR14:46599801  | 14 | 46599801  | 46605700  | 5900 | 1 | 2.13E-05 | -0.8446078 | 101 | 1.712  | AABR07015067.1;AABR07015067.2                |            |
| DHR14:46609501  | 14 | 46609501  | 46613300  | 3800 | 1 | 9.63E-06 | -1.0636189 | 68  | 1.789  |                                              |            |
| DHR14:46633701  | 14 | 46633701  | 46635700  | 2000 | 1 | 5.67E-06 | -0.9113983 | 158 | 7.9    | RF01518                                      |            |
| DHR14:46636901  | 14 | 46636901  | 46642000  | 5100 | 3 | 2.04E-06 | -1.0960068 | 580 | 11.373 | RF01518;Rn5-8s;AABR07015078.1;AABR07015078.2 |            |
| DHR14:46666601  | 14 | 46666601  | 46667400  | 800  | 1 | 2.34E-05 | -1.5826909 | 6   | 0.75   | AABR07015081.2                               |            |
| DHR14:46678401  | 14 | 46678401  | 46683600  | 5200 | 4 | 4.38E-06 | -1.0822103 | 560 | 10.769 | RF01518;RF00002                              |            |
| DHR14:52440001  | 14 | 52440001  | 52440200  | 200  | 1 | 6.98E-05 | 1.8726102  | 1   | 0.5    |                                              |            |
| DHR14:71475701  | 14 | 71475701  | 71475800  | 100  | 1 | 1.54E-05 | 2.0341017  | 1   | 1      |                                              |            |
| DHR14:94776701  | 14 | 94776701  | 94777000  | 300  | 1 | 2.92E-07 | 0.6360154  | 10  | 3.333  | AABR07016166.1                               |            |
| DHR14:95386201  | 14 | 95386201  | 95386400  | 200  | 1 | 2.57E-05 | -2.576022  | 3   | 1.5    |                                              |            |
| DHR14:95728701  | 14 | 95728701  | 95728800  | 100  | 1 | 9.88E-05 | -2.3398942 | 1   | 1      |                                              |            |
| DHR14:101401801 | 14 | 101401801 | 101404600 | 2800 | 1 | 5.15E-05 | -2.5427721 | 27  | 0.964  |                                              |            |
| DHR14:101987301 | 14 | 101987301 | 101990000 | 2700 | 1 | 6.85E-05 | -1.7369854 | 50  | 1.852  |                                              |            |
| DHR14:102136701 | 14 | 102136701 | 102136900 | 200  | 1 | 6.98E-05 | -2.2727134 | 3   | 1.5    |                                              |            |
| DHR14:102152301 | 14 | 102152301 | 102153400 | 1100 | 1 | 1.31E-05 | -2.8249046 | 10  | 0.909  |                                              |            |
| DHR15:21322401  | 15 | 21322401  | 21323100  | 700  | 1 | 5.32E-05 | -1.8890726 | 5   | 0.714  |                                              |            |
| DHR15:22353901  | 15 | 22353901  | 22354900  | 1000 | 2 | 1.26E-05 | -1.8311559 | 15  | 1.5    |                                              |            |
| DHR15:22384601  | 15 | 22384601  | 22386200  | 1600 | 1 | 2.72E-05 | -2.1712526 | 29  | 1.812  |                                              |            |
| DHR15:22684201  | 15 | 22684201  | 22684300  | 100  | 1 | 1.98E-06 | -3.4201967 | 2   | 2      |                                              |            |
| DHR15:65100301  | 15 | 65100301  | 65101400  | 1100 | 1 | 3.92E-05 | -2.2330077 | 5   | 0.455  |                                              |            |
| DHR15:65195901  | 15 | 65195901  | 65198600  | 2700 | 1 | 8.87E-05 | -1.1233095 | 13  | 0.481  | AABR07018574.1                               |            |
| DHR15:65228701  | 15 | 65228701  | 65229300  | 600  | 1 | 7.80E-05 | -1.6869571 | 8   | 1.333  |                                              |            |
| DHR15:107460701 | 15 | 107460701 | 107461500 | 800  | 1 | 3.38E-05 | -1.9419557 | 6   | 0.75   |                                              |            |
| DHR16:30283401  | 16 | 30283401  | 30283600  | 200  | 1 | 8.59E-05 | -2.3542744 | 5   | 2.5    |                                              |            |
| DHR16:30748701  | 16 | 30748701  | 30749100  | 400  | 2 | 6.87E-05 | -2.0858631 | 8   | 2      |                                              |            |
| DHR16:31026001  | 16 | 31026001  | 31026500  | 500  | 1 | 7.72E-05 | -2.4701003 | 12  | 2.4    |                                              |            |
| DHR16:37773601  | 16 | 37773601  | 37774800  | 1200 | 1 | 9.09E-05 | 0.94231    | 4   | 0.333  | Gla3                                         | Receptor   |
| DHR16:64912601  | 16 | 64912601  | 64913200  | 600  | 1 | 8.33E-05 | -1.8617178 | 4   | 0.667  |                                              |            |
| DHR16:64924301  | 16 | 64924301  | 64925600  | 1300 | 1 | 5.52E-06 | -2.2279383 | 13  | 1      | AABR07026120.1                               |            |

|                |    |           |           |      |   |          |            |     |       |                |               |
|----------------|----|-----------|-----------|------|---|----------|------------|-----|-------|----------------|---------------|
| DHR16:66340901 | 16 | 66340901  | 66341200  | 300  | 1 | 8.72E-06 | -1.1104075 | 2   | 0.667 | LOC302192      | Unknown       |
| DHR17:11806201 | 17 | 11806201  | 11806400  | 200  | 1 | 7.97E-05 | -1.5915205 | 1   | 0.5   |                |               |
| DHR17:11808501 | 17 | 11808501  | 11809800  | 1300 | 1 | 6.58E-05 | -1.1296086 | 11  | 0.846 |                |               |
| DHR17:12514901 | 17 | 12514901  | 12516100  | 1200 | 1 | 6.81E-06 | -2.2666933 | 3   | 0.25  |                |               |
| DHR17:43378001 | 17 | 43378001  | 43378700  | 700  | 1 | 1.74E-06 | 2.2180372  | 4   | 0.571 | Scgn           | Signaling     |
| DHR17:43552901 | 17 | 43552901  | 43553100  | 200  | 1 | 8.00E-05 | 1.9655098  | 3   | 1.5   | Slc17a3        | Transport     |
| DHR17:89456501 | 17 | 89456501  | 89460100  | 3600 | 1 | 4.25E-05 | 0.4642291  | 9   | 0.25  | AABR07028872.1 |               |
| DHR18:5383501  | 18 | 5383501   | 5386000   | 2500 | 1 | 9.18E-05 | 1.7734428  | 26  | 1.04  |                |               |
| DHR18:87926201 | 18 | 87926201  | 87927500  | 1300 | 1 | 6.67E-05 | -1.877608  | 27  | 2.077 |                |               |
| DHR19:5827701  | 19 | 5827701   | 5828000   | 300  | 1 | 6.73E-05 | -1.5088893 | 5   | 1.667 |                |               |
| DHR19:5829001  | 19 | 5829001   | 5837200   | 8200 | 2 | 3.86E-06 | -4.1764919 | 234 | 2.854 |                |               |
| DHR19:26457301 | 19 | 26457301  | 26458800  | 1500 | 1 | 4.32E-05 | -1.9015546 | 14  | 0.933 |                |               |
| DHR19:29942401 | 19 | 29942401  | 29942700  | 300  | 1 | 3.92E-05 | 1.86385    | 0   | 0     | Inpp4b         | Signaling     |
| DHR19:45476401 | 19 | 45476401  | 45476600  | 200  | 1 | 1.79E-05 | 1.6743088  | 2   | 1     |                |               |
| DHR20:40830801 | 20 | 40830801  | 40832100  | 1300 | 2 | 1.90E-05 | 1.0902238  | 2   | 0.154 |                |               |
| DHR20:40898601 | 20 | 40898601  | 40899100  | 500  | 1 | 2.49E-06 | 0.5489577  | 15  | 3     |                |               |
| DHRX:73101     | X  | 73101     | 74400     | 1300 | 2 | 3.60E-05 | -1.5560481 | 5   | 0.385 |                |               |
| DHRX:78701     | X  | 78701     | 80000     | 1300 | 1 | 2.93E-05 | -2.5084997 | 5   | 0.385 |                |               |
| DHRX:89101     | X  | 89101     | 92600     | 3500 | 1 | 6.47E-05 | -1.3076018 | 23  | 0.657 |                |               |
| DHRX:93701     | X  | 93701     | 94400     | 700  | 1 | 2.46E-06 | -1.6469482 | 3   | 0.429 |                |               |
| DHRX:110801    | X  | 110801    | 113600    | 2800 | 1 | 5.65E-05 | -1.5562906 | 23  | 0.821 |                |               |
| DHRX:184201    | X  | 184201    | 187000    | 2800 | 1 | 7.47E-05 | -2.4758094 | 8   | 0.286 |                |               |
| DHRX:310801    | X  | 310801    | 311400    | 600  | 1 | 7.76E-05 | -1.5230017 | 2   | 0.333 |                |               |
| DHRX:18229801  | X  | 18229801  | 18231000  | 1200 | 1 | 1.28E-05 | -1.1458284 | 4   | 0.333 |                |               |
| DHRX:19634101  | X  | 19634101  | 19634200  | 100  | 1 | 7.34E-05 | -2.2778006 | 1   | 1     |                |               |
| DHRX:26152101  | X  | 26152101  | 26152400  | 300  | 1 | 2.56E-06 | 1.9490626  | 5   | 1.667 |                |               |
| DHRX:26277201  | X  | 26277201  | 26277400  | 200  | 1 | 9.18E-05 | 1.6885609  | 0   | 0     |                |               |
| DHRX:66868601  | X  | 66868601  | 66868700  | 100  | 1 | 7.65E-05 | 1.8626987  | 0   | 0     |                |               |
| DHRX:104053201 | X  | 104053201 | 104053400 | 200  | 1 | 6.73E-05 | -2.7218632 | 0   | 0     |                |               |
| DHRX:150665601 | X  | 150665601 | 150666200 | 600  | 1 | 2.15E-05 | 1.7429319  | 5   | 0.833 | AABR07042226.1 |               |
| DHRX:155836801 | X  | 155836801 | 155836900 | 100  | 1 | 7.48E-05 | -1.8028732 | 5   | 5     | Dkc1           | Transcription |
| DHRY:208901    | Y  | 208901    | 209100    | 200  | 1 | 8.48E-05 | -2.3677459 | 4   | 2     | LOC103694540   |               |
| DHRY:1838301   | Y  | 1838301   | 1839200   | 900  | 1 | 2.35E-05 | -0.9688381 | 32  | 3.556 |                |               |
| DHRY:1840201   | Y  | 1840201   | 1847900   | 7700 | 1 | 2.09E-06 | -2.2757602 | 259 | 3.364 |                |               |

**(C) Control H3K27me3 Caput versus Cauda**

| DHR Name       | Chr | Start     | Stop      | Length | # Sig Win | minP     | maxLFC     | CpG # | CpG Density | Gene Annotation                                                                                                                                                                                                                                                                                                                                                                     | Gene Category |
|----------------|-----|-----------|-----------|--------|-----------|----------|------------|-------|-------------|-------------------------------------------------------------------------------------------------------------------------------------------------------------------------------------------------------------------------------------------------------------------------------------------------------------------------------------------------------------------------------------|---------------|
| DHR1:37352801  | 1   | 37352801  | 37353100  | 300    | 1         | 8.53E-05 | 1.7874461  | 2     | 0.667       |                                                                                                                                                                                                                                                                                                                                                                                     |               |
| DHR1:38368801  | 1   | 38368801  | 38370300  | 1500   | 1         | 5.63E-07 | -3.6888712 | 3     | 0.2         |                                                                                                                                                                                                                                                                                                                                                                                     |               |
| DHR2:693501    | 2   | 693501    | 694200    | 700    | 1         | 4.24E-05 | -2.2231222 | 2     | 0.286       |                                                                                                                                                                                                                                                                                                                                                                                     |               |
| DHR2:774301    | 2   | 774301    | 774700    | 400    | 1         | 2.56E-05 | -2.4026656 | 1     | 0.25        |                                                                                                                                                                                                                                                                                                                                                                                     |               |
| DHR2:835401    | 2   | 835401    | 835900    | 500    | 1         | 9.95E-05 | -1.8924458 | 0     | 0           |                                                                                                                                                                                                                                                                                                                                                                                     |               |
| DHR2:20252501  | 2   | 20252501  | 20252600  | 100    | 1         | 9.74E-05 | 1.6328888  | 2     | 2           |                                                                                                                                                                                                                                                                                                                                                                                     |               |
| DHR2:146854701 | 2   | 146854701 | 146855100 | 400    | 1         | 2.52E-05 | 1.8788249  | 12    | 3           |                                                                                                                                                                                                                                                                                                                                                                                     |               |
| DHR2:161097001 | 2   | 161097001 | 161097300 | 300    | 1         | 5.28E-05 | -1.9392416 | 2     | 0.667       |                                                                                                                                                                                                                                                                                                                                                                                     |               |
| DHR3:133887401 | 3   | 133887401 | 133887600 | 200    | 1         | 7.09E-05 | -2.3294361 | 0     | 0           | AABR07053968.1                                                                                                                                                                                                                                                                                                                                                                      |               |
| DHR4:146477201 | 4   | 146477201 | 146477700 | 500    | 1         | 3.16E-05 | 0.8858945  | 9     | 1.8         |                                                                                                                                                                                                                                                                                                                                                                                     |               |
| DHR4:146538701 | 4   | 146538701 | 146548700 | 10000  | 1         | 3.70E-06 | 0.6206305  | 294   | 2.94        |                                                                                                                                                                                                                                                                                                                                                                                     |               |
| DHR4:173875501 | 4   | 173875501 | 173875600 | 100    | 1         | 6.94E-05 | 1.9324548  | 1     | 1           | Pik3c2g;AABR07062390.2                                                                                                                                                                                                                                                                                                                                                              | Signaling     |
| DHR5:6372701   | 5   | 6372701   | 6374700   | 2000   | 13        | 4.85E-11 | -2.1580081 | 33    | 1.65        | AABR07046778.1                                                                                                                                                                                                                                                                                                                                                                      |               |
| DHR5:58954701  | 5   | 58954701  | 58954800  | 100    | 1         | 6.64E-05 | 1.792298   | 2     | 2           | Cd72                                                                                                                                                                                                                                                                                                                                                                                |               |
| DHR7:1595101   | 7   | 1595101   | 1595200   | 100    | 1         | 7.43E-05 | -1.6863379 | 2     | 2           | LOC108351589                                                                                                                                                                                                                                                                                                                                                                        |               |
| DHR7:21775901  | 7   | 21775901  | 21776400  | 500    | 1         | 2.76E-05 | -1.7925099 | 2     | 0.4         |                                                                                                                                                                                                                                                                                                                                                                                     |               |
| DHR7:49494401  | 7   | 49494401  | 49494900  | 500    | 1         | 5.16E-05 | 1.610024   | 5     | 1           | Lin7a                                                                                                                                                                                                                                                                                                                                                                               | Cell Junction |
| DHR8:181201    | 8   | 181201    | 182300    | 1100   | 4         | 4.42E-07 | -2.61287   | 24    | 2.182       |                                                                                                                                                                                                                                                                                                                                                                                     |               |
| DHR9:4028201   | 9   | 4028201   | 4029500   | 1300   | 1         | 1.17E-05 | -2.490459  | 13    | 1           |                                                                                                                                                                                                                                                                                                                                                                                     |               |
| DHR9:4788001   | 9   | 4788001   | 4788900   | 900    | 1         | 4.94E-05 | -2.015017  | 6     | 0.667       |                                                                                                                                                                                                                                                                                                                                                                                     |               |
| DHR12:34931101 | 12  | 34931101  | 34931600  | 500    | 1         | 7.27E-05 | -1.4913791 | 1     | 0.2         |                                                                                                                                                                                                                                                                                                                                                                                     |               |
| DHR12:35044601 | 12  | 35044601  | 35044700  | 100    | 1         | 8.27E-05 | 1.6700974  | 0     | 0           |                                                                                                                                                                                                                                                                                                                                                                                     |               |
| DHR15:5789101  | 15  | 5789101   | 5789500   | 400    | 1         | 5.77E-05 | 1.6700537  | 2     | 0.5         | LOC108348081;AABR07016992.1                                                                                                                                                                                                                                                                                                                                                         |               |
| DHR15:55541701 | 15  | 55541701  | 55542000  | 300    | 1         | 2.53E-05 | 1.5401823  | 9     | 3           |                                                                                                                                                                                                                                                                                                                                                                                     |               |
| DHR16:403201   | 16  | 403201    | 403600    | 400    | 1         | 6.31E-06 | 1.2631279  | 9     | 2.25        |                                                                                                                                                                                                                                                                                                                                                                                     |               |
| DHR16:77428601 | 16  | 77428601  | 77429700  | 1100   | 1         | 1.01E-05 | 2.1205017  | 7     | 0.636       |                                                                                                                                                                                                                                                                                                                                                                                     |               |
| DHR19:8431601  | 19  | 8431601   | 8431900   | 300    | 1         | 7.13E-06 | -2.6407775 | 7     | 2.333       |                                                                                                                                                                                                                                                                                                                                                                                     |               |
| DHR20:19484001 | 20  | 19484001  | 19485200  | 1200   | 12        | 1.03E-11 | -2.5311577 | 14    | 1.167       | Fam13c                                                                                                                                                                                                                                                                                                                                                                              |               |
| DHRMT:1        | MT  | 1         | 16300     | 16300  | 147       | 2.27E-17 | -2.5261656 | 303   | 1.859       | AY172581.13;AY172581.9;AY172581.3;AY172581.24;AY172581.14;Mt-nd1;AY172581.4;AY172581.21;AY172581.15;Mt-nd2;AY172581.6;AY172581.22;AY172581.18;AY172581.10;AY172581.7;Mt-co1;AY172581.19;AY172581.12;Mt-co2;AY172581.1;Mt-atp8;Mt-atp6;Mt-co3;AY172581.5;Mt-nd3;AY172581.16;Mt-nd4;Mt-nd4;AY172581.23;AY172581.17;AY172581.11;Mt-nd5;Mt-nd6;AY172581.20;Mt-cyb;AY172581.8;AY172581.2 |               |
| DHRX:36450401  | X   | 36450401  | 36451200  | 800    | 1         | 9.38E-05 | 0.6087044  | 30    | 3.75        |                                                                                                                                                                                                                                                                                                                                                                                     |               |
| DHRX:89297801  | X   | 89297801  | 89298000  | 200    | 1         | 4.24E-05 | 1.746955   | 0     | 0           |                                                                                                                                                                                                                                                                                                                                                                                     |               |
| DHRX:98571301  | X   | 98571301  | 98571400  | 100    | 1         | 4.27E-05 | -2.3296222 | 0     | 0           |                                                                                                                                                                                                                                                                                                                                                                                     |               |
| DHRX:113683801 | X   | 113683801 | 113684700 | 900    | 1         | 8.35E-05 | 1.8216035  | 9     | 1           |                                                                                                                                                                                                                                                                                                                                                                                     |               |
| DHRX:145785801 | X   | 145785801 | 145786000 | 200    | 1         | 6.64E-05 | 1.7922848  | 3     | 1.5         |                                                                                                                                                                                                                                                                                                                                                                                     |               |
