# Supplementary material
Source: PubMed Central journal article supplement (PMC7484192)
Supplement: NIHMS1614283-supplement-7.pdf [file NIHMS1614283-supplement-7.pdf]

Supplemental Table S2

(A) DDT Round Spermatid DHR List

| DHR Name        | Chr | Start     | Stop      | Length | # Sig Win | minP     | maxLFC     | CpG # | CpG Density | Gene Annotation          | Gene Category |
|-----------------|-----|-----------|-----------|--------|-----------|----------|------------|-------|-------------|--------------------------|---------------|
| DHR1:24888401+L | 1   | 24888401  | 24888500  | 100    | 1         | 5.41E-05 | -1.6163981 | 0     | 0           | AABR07000738.1           |               |
| DHR1:116086301  | 1   | 116086301 | 116086500 | 200    | 1         | 5.84E-05 | -1.9463774 | 2     | 1           | Atp10a                   | Transport     |
| DHR1:179972601  | 1   | 179972601 | 179975100 | 2500   | 1         | 5.32E-05 | 1.6245419  | 12    | 0.48        |                          |               |
| DHR1:196186701  | 1   | 196186701 | 196186800 | 100    | 1         | 8.01E-06 | -2.5323772 | 1     | 1           |                          |               |
| DHR1:269436501  | 1   | 269436501 | 269436700 | 200    | 1         | 1.30E-05 | 2.3201821  | 0     | 0           |                          |               |
| DHR2:48692001   | 2   | 48692001  | 48692300  | 300    | 1         | 2.04E-06 | 2.7754533  | 3     | 1           |                          |               |
| DHR2:114565501  | 2   | 114565501 | 114565700 | 200    | 2         | 1.85E-11 | -2.4727895 | 3     | 1.5         |                          |               |
| DHR2:157009201  | 2   | 157009201 | 157009400 | 200    | 1         | 5.51E-05 | -1.4707168 | 1     | 0.5         |                          |               |
| DHR2:219525301  | 2   | 219525301 | 219525500 | 200    | 1         | 6.56E-05 | -1.8820273 | 5     | 2.5         |                          |               |
| DHR2:242007901  | 2   | 242007901 | 242008000 | 100    | 1         | 5.53E-05 | -1.3061864 | 0     | 0           | Ppp3ca                   | Signaling     |
| DHR3:26410101   | 3   | 26410101  | 26410300  | 200    | 1         | 2.72E-05 | -2.6214855 | 4     | 2           |                          |               |
| DHR3:70799201   | 3   | 70799201  | 70799400  | 200    | 1         | 7.82E-05 | -1.9068653 | 5     | 2.5         |                          |               |
| DHR3:102234201  | 3   | 102234201 | 102234300 | 100    | 1         | 2.87E-05 | -2.1407387 | 1     | 1           |                          |               |
| DHR3:149856501  | 3   | 149856501 | 149856700 | 200    | 2         | 1.05E-07 | -1.8950988 | 8     | 4           | Cdk5rap1                 | Signaling     |
| DHR3:169457801  | 3   | 169457801 | 169459300 | 1500   | 1         | 9.35E-06 | 2.0081008  | 9     | 0.6         |                          |               |
| DHR3:173401701  | 3   | 173401701 | 173402000 | 300    | 1         | 7.72E-05 | -1.8481771 | 1     | 0.333       |                          |               |
| DHR4:63748701   | 4   | 63748701  | 63749000  | 300    | 1         | 1.76E-05 | -2.4524937 | 0     | 0           |                          |               |
| DHR4:126752601  | 4   | 126752601 | 126752800 | 200    | 1         | 2.36E-05 | -1.4460772 | 0     | 0           |                          |               |
| DHR4:165619301  | 4   | 165619301 | 165619500 | 200    | 2         | 1.13E-07 | -2.5579882 | 3     | 1.5         | Ybx3;RF00156             | Unknown       |
| DHR5:45446501   | 5   | 45446501  | 45446700  | 200    | 1         | 7.25E-07 | 2.7767324  | 0     | 0           |                          |               |
| DHR5:74897201   | 5   | 74897201  | 74897300  | 100    | 1         | 2.71E-07 | -2.6027233 | 5     | 5           | AC134204.1;Akap2;RF00017 | Signaling     |
| DHR6:67091301   | 6   | 67091301  | 67091400  | 100    | 1         | 3.40E-05 | -1.8315189 | 2     | 2           | Nova1                    | Transcription |
| DHR7:22395401   | 7   | 22395401  | 22396600  | 1200   | 1         | 4.51E-05 | 0.7553002  | 2     | 0.167       |                          |               |
| DHR7:53452301   | 7   | 53452301  | 53452900  | 600    | 1         | 6.46E-05 | 1.9021529  | 5     | 0.833       |                          |               |
| DHR7:53504901   | 7   | 53504901  | 53505000  | 100    | 1         | 2.58E-07 | 2.8141545  | 0     | 0           |                          |               |
| DHR7:114548401  | 7   | 114548401 | 114548700 | 300    | 1         | 3.00E-05 | -1.3713732 | 1     | 0.333       | Ptk2                     | Signaling     |
| DHR8:10334701   | 8   | 10334701  | 10335200  | 500    | 1         | 5.92E-05 | 2.187003   | 5     | 1           |                          |               |
| DHR8:10675201   | 8   | 10675201  | 10675300  | 100    | 1         | 7.33E-05 | -1.5115469 | 0     | 0           |                          |               |
| DHR8:103539201  | 8   | 103539201 | 103539400 | 200    | 1         | 6.46E-07 | 2.4662079  | 0     | 0           | Trpc1                    | Transport     |
| DHR9:22025001   | 9   | 22025001  | 22026500  | 1500   | 1         | 1.77E-05 | 2.1357692  | 3     | 0.2         |                          |               |
| DHR9:67578901   | 9   | 67578901  | 67579100  | 200    | 1         | 9.59E-05 | 1.7692777  | 3     | 1.5         | Cd28                     | Receptor      |
| DHR9:103473601  | 9   | 103473601 | 103474000 | 400    | 1         | 3.19E-05 | 2.4458437  | 4     | 1           |                          |               |
| DHR9:116461301  | 9   | 116461301 | 116461400 | 100    | 1         | 6.94E-05 | 2.3745356  | 0     | 0           |                          |               |
| DHR13:14200701  | 13  | 14200701  | 14201000  | 300    | 1         | 4.20E-05 | 1.8751983  | 7     | 2.333       |                          |               |
| DHR13:58444501  | 13  | 58444501  | 58444600  | 100    | 1         | 2.95E-05 | -2.0140164 | 1     | 1           |                          |               |
| DHR13:72018701  | 13  | 72018701  | 72018900  | 200    | 1         | 4.29E-05 | 2.1972074  | 3     | 1.5         | Cacna1e                  | Transport     |
| DHR14:46547101  | 14  | 46547101  | 46548900  | 1800   | 1         | 9.66E-05 | 0.7659273  | 39    | 2.167       |                          |               |
| DHR14:94625501  | 14  | 94625501  | 94625700  | 200    | 1         | 4.43E-05 | -0.7254696 | 2     | 1           |                          |               |
| DHR15:67129301  | 15  | 67129301  | 67129500  | 200    | 1         | 9.87E-05 | 2.1592131  | 0     | 0           |                          |               |
| DHR17:76671301  | 17  | 76671301  | 76671400  | 100    | 1         | 5.96E-05 | 1.6314816  | 0     | 0           | Camk1d                   | Signaling     |
| DHR17:89385101  | 17  | 89385101  | 89396800  | 11700  | 5         | 8.19E-09 | 1.6324951  | 86    | 0.735       |                          |               |
| DHR17:89407901  | 17  | 89407901  | 89411600  | 3700   | 2         | 1.22E-05 | 0.8545634  | 26    | 0.703       |                          |               |
| DHR17:89412701  | 17  | 89412701  | 89419300  | 6600   | 4         | 1.65E-07 | 0.9051095  | 68    | 1.03        |                          |               |
| DHR17:89427101  | 17  | 89427101  | 89428900  | 1800   | 1         | 3.41E-05 | 1.1777023  | 17    | 0.944       |                          |               |
| DHR17:89430101  | 17  | 89430101  | 89442200  | 12100  | 7         | 1.24E-06 | 1.0274704  | 72    | 0.595       |                          |               |
| DHR18:37041501  | 18  | 37041501  | 37041700  | 200    | 2         | 1.67E-07 | -1.5397304 | 0     | 0           | Ppp2r2b                  | Signaling     |
| DHR18:47369001  | 18  | 47369001  | 47369200  | 200    | 1         | 3.25E-05 | -1.9499729 | 0     | 0           |                          |               |
| DHR18:66430701  | 18  | 66430701  | 66432500  | 1800   | 1         | 5.02E-05 | 1.8780219  | 20    | 1.111       |                          |               |
| DHR19:204801    | 19  | 204801    | 208400    | 3600   | 1         | 6.83E-05 | 0.9875035  | 22    | 0.611       | LOC108348293             |               |
| DHR19:391801    | 19  | 391801    | 392000    | 200    | 1         | 6.22E-05 | 1.3196853  | 2     | 1           | LOC102547811             | EST           |
| DHR19:26959901  | 19  | 26959901  | 26960000  | 100    | 1         | 1.07E-05 | -2.2558462 | 2     | 2           |                          |               |
| DHR19:28603101  | 19  | 28603101  | 28603300  | 200    | 1         | 7.84E-05 | -1.5002089 | 2     | 1           | AABR07043449.1           |               |
| DHR19:28881501  | 19  | 28881501  | 28881700  | 200    | 1         | 3.89E-05 | -1.354041  | 1     | 0.5         |                          |               |

|                |    |           |           |      |   |          |            |    |       |                                               |        |
|----------------|----|-----------|-----------|------|---|----------|------------|----|-------|-----------------------------------------------|--------|
| DHR20:4678301  | 20 | 4678301   | 4680100   | 1800 | 1 | 7.22E-05 | -1.219849  | 13 | 0.722 | RT1-CE1;AABR07044397.1;RT1-CE4;AABR07044404.1 | Immune |
| DHR20:4939601  | 20 | 4939601   | 4939900   | 300  | 1 | 2.26E-06 | -1.8397839 | 1  | 0.333 | RT1-CE1;RT1-CE4;AABR07044408.1;RT1-CE3        | Immune |
| DHR20:5399001  | 20 | 5399001   | 5399500   | 500  | 1 | 4.57E-07 | 2.7761432  | 7  | 1.4   | RT1-A1                                        | Immune |
| DHRX:322501    | X  | 322501    | 325600    | 3100 | 1 | 4.18E-05 | 1.7944409  | 18 | 0.581 |                                               |        |
| DHRX:117439701 | X  | 117439701 | 117441200 | 1500 | 1 | 1.77E-05 | 2.3223174  | 13 | 0.867 |                                               |        |
| DHRX:118675601 | X  | 118675601 | 118675700 | 100  | 1 | 9.50E-05 | -2.1364255 | 0  | 0     |                                               |        |
| DHRX:150223001 | X  | 150223001 | 150223300 | 300  | 1 | 9.82E-05 | -1.6634364 | 6  | 2     |                                               |        |
| DHRX:150526001 | X  | 150526001 | 150529400 | 3400 | 1 | 9.33E-05 | 2.4049182  | 12 | 0.353 |                                               |        |

**(B) DDT Caput DHR List**

| DHR Name       | Chr | Start     | Stop      | Length | # Sig Win | minP     | maxLFC     | CpG # | CpG Density | Gene Annotation               | Gene Category |
|----------------|-----|-----------|-----------|--------|-----------|----------|------------|-------|-------------|-------------------------------|---------------|
| DHR1:30130601  | 1   | 30130601  | 30133600  | 3000   | 1         | 5.89E-05 | 1.6519664  | 25    | 0.833       |                               |               |
| DHR1:38079701  | 1   | 38079701  | 38081400  | 1700   | 1         | 1.94E-05 | 1.4974718  | 13    | 0.765       |                               |               |
| DHR1:39045901  | 1   | 39045901  | 39047900  | 2000   | 1         | 8.50E-05 | -1.4114117 | 15    | 0.75        |                               |               |
| DHR1:54290001  | 1   | 54290001  | 54291000  | 1000   | 1         | 7.71E-05 | 1.936333   | 6     | 0.6         | AABR07001610.1;LOC102551080   |               |
| DHR1:76608501  | 1   | 76608501  | 76608700  | 200    | 2         | 4.48E-06 | 2.3180353  | 1     | 0.5         | Sult2a2                       | Metabolism    |
| DHR1:86140301  | 1   | 86140301  | 86141300  | 1000   | 1         | 8.96E-05 | -1.93554   | 6     | 0.6         | Vom2r10                       | Receptor      |
| DHR1:179599001 | 1   | 179599001 | 179599500 | 500    | 1         | 5.88E-07 | 1.3631321  | 6     | 1.2         |                               |               |
| DHR1:181925201 | 1   | 181925201 | 181928100 | 2900   | 1         | 3.07E-05 | 1.7646905  | 33    | 1.138       |                               |               |
| DHR1:182777001 | 1   | 182777001 | 182778100 | 1100   | 1         | 6.96E-05 | 2.0192886  | 9     | 0.818       |                               |               |
| DHR2:3325801   | 2   | 3325801   | 3326800   | 1000   | 1         | 5.52E-07 | 2.604142   | 11    | 1.1         |                               |               |
| DHR2:47057101  | 2   | 47057101  | 47057200  | 100    | 1         | 6.96E-05 | -1.9338931 | 1     | 1           | Itga2                         | Signaling     |
| DHR2:61619701  | 2   | 61619701  | 61619800  | 100    | 1         | 7.51E-05 | 1.7142687  | 1     | 1           |                               |               |
| DHR2:76206401  | 2   | 76206401  | 76207100  | 700    | 1         | 9.04E-05 | 1.9747039  | 3     | 0.429       |                               |               |
| DHR2:162108601 | 2   | 162108601 | 162108800 | 200    | 1         | 7.92E-05 | 1.9473502  | 2     | 1           |                               |               |
| DHR2:192227201 | 2   | 192227201 | 192227400 | 200    | 1         | 4.72E-05 | 2.0597676  | 0     | 0           |                               |               |
| DHR2:197219801 | 2   | 197219801 | 197220200 | 400    | 1         | 4.25E-05 | 2.0596633  | 6     | 1.5         | RF00002                       |               |
| DHR2:197496901 | 2   | 197496901 | 197497600 | 700    | 1         | 8.87E-05 | 1.7169487  | 6     | 0.857       |                               |               |
| DHR2:218356201 | 2   | 218356201 | 218356400 | 200    | 1         | 1.17E-05 | 2.073891   | 2     | 1           |                               |               |
| DHR2:222703501 | 2   | 222703501 | 222703600 | 100    | 1         | 2.59E-05 | 2.2131333  | 0     | 0           | Dpyd                          | Metabolism    |
| DHR2:266189101 | 2   | 266189101 | 266189300 | 200    | 1         | 8.35E-05 | 1.5330014  | 3     | 1.5         |                               |               |
| DHR3:133742201 | 3   | 133742201 | 133742800 | 600    | 1         | 3.50E-05 | 1.6112131  | 6     | 1           |                               |               |
| DHR3:133967901 | 3   | 133967901 | 133968200 | 300    | 1         | 8.99E-05 | -1.4765032 | 0     | 0           |                               |               |
| DHR3:145938701 | 3   | 145938701 | 145939000 | 300    | 1         | 8.94E-05 | 1.478192   | 1     | 0.333       |                               |               |
| DHR3:165410801 | 3   | 165410801 | 165411000 | 200    | 1         | 5.79E-05 | -1.7658427 | 0     | 0           | AABR07054639.1                |               |
| DHR4:3425901   | 4   | 3425901   | 3426100   | 200    | 1         | 9.82E-05 | -1.3413506 | 1     | 0.5         |                               |               |
| DHR4:53028301  | 4   | 53028301  | 53028600  | 300    | 1         | 4.55E-05 | -1.4672048 | 4     | 1.333       |                               |               |
| DHR4:135603301 | 4   | 135603301 | 135603600 | 300    | 1         | 5.29E-05 | 1.7497501  | 4     | 1.333       |                               |               |
| DHR4:148503001 | 4   | 148503001 | 148504700 | 1700   | 1         | 3.36E-05 | 2.2863557  | 14    | 0.824       |                               |               |
| DHR4:162306301 | 4   | 162306301 | 162306400 | 100    | 1         | 5.66E-05 | 2.0981169  | 0     | 0           | Clec2dl1;Clec2d               | Development   |
| DHR4:164589401 | 4   | 164589401 | 164589600 | 200    | 1         | 2.58E-05 | -2.1779775 | 3     | 1.5         | Ly49s4;Ly49i4                 | Receptor      |
| DHR5:8926301   | 5   | 8926301   | 8926600   | 300    | 1         | 4.11E-05 | 1.9738915  | 5     | 1.667       | Ppp1r42                       |               |
| DHR5:15107301  | 5   | 15107301  | 15107500  | 200    | 1         | 2.90E-06 | 3.1393516  | 1     | 0.5         |                               |               |
| DHR5:16284501  | 5   | 16284501  | 16285600  | 1100   | 1         | 1.29E-05 | 1.5544401  | 27    | 2.455       |                               |               |
| DHR5:24717401  | 5   | 24717401  | 24720300  | 2900   | 1         | 2.08E-05 | 0.9556804  | 18    | 0.621       | AABR07047221.1                |               |
| DHR5:24754801  | 5   | 24754801  | 24761100  | 6300   | 1         | 8.99E-05 | 1.5936224  | 56    | 0.889       | AABR07047221.1                |               |
| DHR5:24815901  | 5   | 24815901  | 24817700  | 1800   | 1         | 3.01E-06 | 1.8900487  | 14    | 0.778       | AABR07047221.1                |               |
| DHR5:49912501  | 5   | 49912501  | 49912900  | 400    | 1         | 9.87E-05 | 1.3732729  | 2     | 0.5         |                               |               |
| DHR5:58001901  | 5   | 58001901  | 58002200  | 300    | 1         | 7.29E-06 | -2.1700809 | 2     | 0.667       | Dnai1                         | Cytoskeleton  |
| DHR6:19824501  | 6   | 19824501  | 19826800  | 2300   | 1         | 8.70E-06 | 2.2431     | 20    | 0.87        |                               |               |
| DHR6:42044401  | 6   | 42044401  | 42044500  | 100    | 1         | 9.78E-08 | 2.5957097  | 1     | 1           |                               |               |
| DHR6:50668901  | 6   | 50668901  | 50669100  | 200    | 1         | 4.28E-05 | -2.23717   | 1     | 0.5         |                               |               |
| DHR6:103799601 | 6   | 103799601 | 103803100 | 3500   | 1         | 3.74E-05 | -1.4926898 | 26    | 0.743       | AABR07064998.2;AABR07064998.1 |               |
| DHR6:139990201 | 6   | 139990201 | 139990900 | 700    | 1         | 2.58E-05 | -2.015583  | 1     | 0.143       | AABR07065740.1                |               |
| DHR7:279801    | 7   | 279801    | 280000    | 200    | 1         | 3.90E-05 | 1.9008808  | 3     | 1.5         |                               |               |
| DHR7:7487501   | 7   | 7487501   | 7489900   | 2400   | 1         | 4.11E-05 | 2.0109218  | 21    | 0.875       |                               |               |
| DHR7:21598901  | 7   | 21598901  | 21599100  | 200    | 1         | 9.98E-05 | -1.7759741 | 0     | 0           |                               |               |
| DHR7:21682801  | 7   | 21682801  | 21683300  | 500    | 1         | 8.71E-05 | 2.3935243  | 1     | 0.2         |                               |               |
| DHR7:22010601  | 7   | 22010601  | 22014600  | 4000   | 1         | 6.87E-05 | 1.5317105  | 25    | 0.625       |                               |               |
| DHR7:35621701  | 7   | 35621701  | 35622300  | 600    | 1         | 7.10E-05 | 2.1615126  | 2     | 0.333       |                               |               |
| DHR7:83221301  | 7   | 83221301  | 83222600  | 1300   | 1         | 1.56E-05 | 2.1367253  | 12    | 0.923       |                               |               |
| DHR7:86781101  | 7   | 86781101  | 86781400  | 300    | 1         | 7.35E-05 | 2.0541121  | 1     | 0.333       | AABR07057765.1                |               |
| DHR8:10647101  | 8   | 10647101  | 10647700  | 600    | 1         | 6.23E-05 | 1.7650271  | 6     | 1           |                               |               |
| DHR8:37144001  | 8   | 37144001  | 37144100  | 100    | 1         | 7.10E-05 | -2.0099961 | 3     | 3           |                               |               |
| DHR9:7255401   | 9   | 7255401   | 7255500   | 100    | 1         | 7.48E-05 | 1.8369687  | 3     | 3           |                               |               |

|                 |    |           |           |       |    |          |            |    |       |                                                                              |                              |
|-----------------|----|-----------|-----------|-------|----|----------|------------|----|-------|------------------------------------------------------------------------------|------------------------------|
| DHR9:24716301   | 9  | 24716301  | 24719100  | 2800  | 1  | 1.92E-05 | 1.9746245  | 32 | 1.143 |                                                                              |                              |
| DHR9:118945501  | 9  | 118945501 | 118945700 | 200   | 1  | 5.83E-05 | -1.870706  | 2  | 1     | Dlgap1                                                                       | Signaling                    |
| DHR10:854401    | 10 | 854401    | 854500    | 100   | 1  | 2.53E-07 | 2.8817345  | 0  | 0     | Myh11;Nde1                                                                   | Cytoskeleton;<br>Development |
| DHR11:90459201  | 11 | 90459201  | 90459400  | 200   | 1  | 4.78E-05 | 1.3825382  | 0  | 0     |                                                                              |                              |
| DHR12:49171701  | 12 | 49171701  | 49171800  | 100   | 1  | 4.64E-05 | -2.0869442 | 1  | 1     |                                                                              |                              |
| DHR13:25407801  | 13 | 25407801  | 25408500  | 700   | 1  | 6.65E-05 | -1.7182997 | 5  | 0.714 |                                                                              |                              |
| DHR13:42426001  | 13 | 42426001  | 42429100  | 3100  | 1  | 6.65E-05 | 1.630022   | 33 | 1.065 | Nckap5                                                                       |                              |
| DHR13:90145301  | 13 | 90145301  | 90149900  | 4600  | 5  | 7.78E-07 | -2.2797344 | 55 | 1.196 | Cd48                                                                         | Immune                       |
| DHR13:103015201 | 13 | 103015201 | 103015400 | 200   | 1  | 2.53E-05 | -1.9467413 | 10 | 5     |                                                                              |                              |
| DHR13:105667901 | 13 | 105667901 | 105668000 | 100   | 1  | 3.90E-05 | -1.8510712 | 1  | 1     | Spata17                                                                      |                              |
| DHR13:112858801 | 13 | 112858801 | 112859000 | 200   | 1  | 9.23E-05 | -2.0800345 | 1  | 0.5   |                                                                              |                              |
| DHR14:96886901  | 14 | 96886901  | 96887000  | 100   | 1  | 2.57E-05 | -2.096594  | 7  | 7     | AABR07016332.1                                                               |                              |
| DHR15:21280101  | 15 | 21280101  | 21280200  | 100   | 1  | 3.79E-06 | 2.2458375  | 1  | 1     |                                                                              |                              |
| DHR15:60059901  | 15 | 60059901  | 60060200  | 300   | 1  | 5.18E-05 | 1.5059873  | 4  | 1.333 | Dnajc15                                                                      | Transcription                |
| DHR15:90829501  | 15 | 90829501  | 90829700  | 200   | 1  | 1.07E-05 | 2.2084926  | 3  | 1.5   | Mycbp2;AABR07019140.1                                                        | Metabolism                   |
| DHR15:93243501  | 15 | 93243501  | 93244400  | 900   | 1  | 5.49E-06 | 1.998557   | 12 | 1.333 | Mycbp2                                                                       | Metabolism                   |
| DHR15:110431201 | 15 | 110431201 | 110431400 | 200   | 1  | 1.24E-05 | -1.6836503 | 2  | 1     | Fgf14;AC109837.1                                                             |                              |
| DHR16:662701    | 16 | 662701    | 663300    | 600   | 1  | 6.52E-05 | -1.1436619 | 3  | 0.5   |                                                                              |                              |
| DHR16:64975701  | 16 | 64975701  | 64979300  | 3600  | 1  | 5.14E-05 | -1.3577215 | 19 | 0.528 | AABR07026125.1                                                               |                              |
| DHR17:10300901  | 17 | 10300901  | 10301000  | 100   | 1  | 9.15E-05 | 1.6463594  | 0  | 0     |                                                                              |                              |
| DHR17:14143001  | 17 | 14143001  | 14143200  | 200   | 1  | 5.03E-05 | -1.8933896 | 6  | 3     |                                                                              |                              |
| DHR17:30500701  | 17 | 30500701  | 30500800  | 100   | 1  | 3.90E-05 | 1.7680686  | 0  | 0     |                                                                              |                              |
| DHR17:53559501  | 17 | 53559501  | 53559700  | 200   | 1  | 3.22E-05 | 2.3070036  | 0  | 0     | Hecw1                                                                        | Protease                     |
| DHR17:65602101  | 17 | 65602101  | 65602200  | 100   | 1  | 3.74E-05 | 2.1394303  | 0  | 0     | Ryr2                                                                         | Receptor                     |
| DHR17:89385801  | 17 | 89385801  | 89397000  | 11200 | 8  | 2.67E-06 | 0.8336181  | 85 | 0.759 |                                                                              |                              |
| DHR17:89407701  | 17 | 89407701  | 89411600  | 3900  | 4  | 4.97E-06 | 0.5768733  | 27 | 0.692 |                                                                              |                              |
| DHR17:89412701  | 17 | 89412701  | 89419300  | 6600  | 7  | 3.21E-07 | 0.8315577  | 68 | 1.03  |                                                                              |                              |
| DHR17:89430001  | 17 | 89430001  | 89442200  | 12200 | 12 | 1.64E-07 | 0.8697929  | 73 | 0.598 |                                                                              |                              |
| DHR17:89443301  | 17 | 89443301  | 89447300  | 4000  | 1  | 4.01E-05 | 0.6385889  | 24 | 0.6   | AABR07028872.1                                                               |                              |
| DHR17:89450301  | 17 | 89450301  | 89464000  | 13700 | 7  | 6.47E-06 | 0.8397715  | 96 | 0.701 | AABR07028872.1                                                               |                              |
| DHR18:5383901   | 18 | 5383901   | 5384700   | 800   | 1  | 1.32E-05 | -1.6553559 | 6  | 0.75  |                                                                              |                              |
| DHR18:83735701  | 18 | 83735701  | 83735900  | 200   | 1  | 9.69E-06 | -1.8875467 | 2  | 1     | RF00003                                                                      |                              |
| DHR19:331001    | 19 | 331001    | 331500    | 500   | 1  | 2.60E-05 | -0.7474444 | 3  | 0.6   | AABR07042611.1;LOC501297                                                     |                              |
| DHR19:28966501  | 19 | 28966501  | 28966700  | 200   | 1  | 7.36E-05 | -1.0735411 | 2  | 1     | LOC501317                                                                    | EST                          |
| DHR19:29292601  | 19 | 29292601  | 29292800  | 200   | 1  | 9.20E-05 | -1.3981489 | 3  | 1.5   | AABR07043564.1                                                               |                              |
| DHR20:2948401   | 20 | 2948401   | 2950400   | 2000  | 1  | 6.27E-05 | -1.9746051 | 28 | 1.4   | AABR07044340.1                                                               |                              |
| DHR20:4692801   | 20 | 4692801   | 4694000   | 1200  | 1  | 4.53E-05 | 2.266428   | 5  | 0.417 | RT1-CE1;RT1-CE4;AABR07044404.1;RT1-CE7                                       | Immune                       |
| DHR20:4903901   | 20 | 4903901   | 4904600   | 700   | 1  | 2.01E-05 | -1.8887848 | 7  | 1     | RT1-CE1;RT1-CE4;RT1-CE7;AABR07044408.1;RT1-CE5;AABR07044408.3;AABR07044408.2 | Immune                       |
| DHR20:37482601  | 20 | 37482601  | 37482800  | 200   | 1  | 4.79E-05 | 1.8146484  | 0  | 0     | Tbc1d32                                                                      | Unknown                      |
| DHRX:316001     | X  | 316001    | 324100    | 8100  | 1  | 5.29E-05 | 1.7497261  | 40 | 0.494 |                                                                              |                              |
| DHRX:325201     | X  | 325201    | 330100    | 4900  | 1  | 5.09E-05 | 1.1632658  | 29 | 0.592 |                                                                              |                              |
| DHRX:2952101    | X  | 2952101   | 2953100   | 1000  | 1  | 2.57E-05 | -2.0965515 | 6  | 0.6   |                                                                              |                              |
| DHRX:32643401   | X  | 32643401  | 32644500  | 1100  | 1  | 3.37E-06 | -2.1661762 | 10 | 0.909 |                                                                              |                              |
| DHRX:46961401   | X  | 46961401  | 46961500  | 100   | 1  | 9.58E-05 | 2.1339948  | 1  | 1     |                                                                              |                              |
| DHRX:70401101   | X  | 70401101  | 70401400  | 300   | 1  | 4.22E-05 | 1.8438171  | 4  | 1.333 | Awat1                                                                        | Metabolism                   |
| DHRX:80454401   | X  | 80454401  | 80457200  | 2800  | 7  | 2.86E-07 | 2.3654307  | 11 | 0.393 |                                                                              |                              |
| DHRX:89078801   | X  | 89078801  | 89078900  | 100   | 1  | 4.28E-05 | -2.237179  | 1  | 1     |                                                                              |                              |
| DHRX:91560801   | X  | 91560801  | 91561600  | 800   | 1  | 3.36E-05 | -1.7571776 | 9  | 1.125 |                                                                              |                              |
| DHRX:150228201  | X  | 150228201 | 150229300 | 1100  | 1  | 7.47E-05 | -2.0437197 | 9  | 0.818 |                                                                              |                              |
| DHRX:150606401  | X  | 150606401 | 150607500 | 1100  | 1  | 7.45E-05 | -1.5564067 | 6  | 0.545 |                                                                              |                              |

## (C) DDT Cauda DHR List

| DHR Name       | Chr | Start     | Stop      | Length | # Sig Win | minP     | maxLFC     | CpG # | CpG Density | Gene Annotation                                                                                                                                                                                                                                                                                                                                                                      | Gene Category |
|----------------|-----|-----------|-----------|--------|-----------|----------|------------|-------|-------------|--------------------------------------------------------------------------------------------------------------------------------------------------------------------------------------------------------------------------------------------------------------------------------------------------------------------------------------------------------------------------------------|---------------|
| DHR1:148308901 | 1   | 148308901 | 148309000 | 100    | 1         | 2.10E-06 | 2.0727644  | 3     | 3           |                                                                                                                                                                                                                                                                                                                                                                                      |               |
| DHR1:153058001 | 1   | 153058001 | 153058100 | 100    | 1         | 7.15E-05 | 2.0348312  | 0     | 0           | Tmem135                                                                                                                                                                                                                                                                                                                                                                              | Unknown       |
| DHR1:189008801 | 1   | 189008801 | 189009100 | 300    | 1         | 7.34E-05 | 2.1542411  | 3     | 1           | AABR07005581.1;RF00560                                                                                                                                                                                                                                                                                                                                                               |               |
| DHR2:155101801 | 2   | 155101801 | 155102400 | 600    | 1         | 5.68E-06 | 2.2454452  | 3     | 0.5         | AABR07010907.1                                                                                                                                                                                                                                                                                                                                                                       |               |
| DHR2:160936601 | 2   | 160936601 | 160936700 | 100    | 1         | 1.37E-05 | -2.0595262 | 1     | 1           |                                                                                                                                                                                                                                                                                                                                                                                      |               |
| DHR2:194120801 | 2   | 194120801 | 194121000 | 200    | 1         | 7.29E-05 | -2.1001661 | 3     | 1.5         |                                                                                                                                                                                                                                                                                                                                                                                      |               |
| DHR3:78904001  | 3   | 78904001  | 78904100  | 100    | 1         | 7.00E-05 | 2.0547735  | 1     | 1           |                                                                                                                                                                                                                                                                                                                                                                                      |               |
| DHR3:143902201 | 3   | 143902201 | 143902300 | 100    | 1         | 7.89E-05 | 1.7920024  | 0     | 0           | Andpro                                                                                                                                                                                                                                                                                                                                                                               |               |
| DHR3:149856501 | 3   | 149856501 | 149856700 | 200    | 2         | 3.55E-07 | -2.3833467 | 8     | 4           | Cdk5rap1                                                                                                                                                                                                                                                                                                                                                                             | Signaling     |
| DHR5:653901    | 5   | 653901    | 655700    | 1800   | 1         | 6.30E-05 | 1.7675615  | 22    | 1.222       |                                                                                                                                                                                                                                                                                                                                                                                      |               |
| DHR7:447801    | 7   | 447801    | 449800    | 2000   | 1         | 6.70E-05 | 1.9712436  | 12    | 0.6         | AABR07055191.1                                                                                                                                                                                                                                                                                                                                                                       |               |
| DHR7:10257101  | 7   | 10257101  | 10257700  | 600    | 1         | 3.55E-06 | -1.8616112 | 1     | 0.167       | AABR07055812.1                                                                                                                                                                                                                                                                                                                                                                       |               |
| DHR7:21795601  | 7   | 21795601  | 21795700  | 100    | 1         | 1.54E-05 | -2.1025766 | 2     | 2           |                                                                                                                                                                                                                                                                                                                                                                                      |               |
| DHR7:32729901  | 7   | 32729901  | 32730000  | 100    | 1         | 3.17E-05 | 1.9724425  | 2     | 2           |                                                                                                                                                                                                                                                                                                                                                                                      |               |
| DHR7:114548401 | 7   | 114548401 | 114548600 | 200    | 1         | 2.33E-05 | -1.517978  | 0     | 0           | Ptk2                                                                                                                                                                                                                                                                                                                                                                                 | Signaling     |
| DHR9:75401701  | 9   | 75401701  | 75401900  | 200    | 1         | 9.02E-05 | 1.7106544  | 0     | 0           | ErbB4                                                                                                                                                                                                                                                                                                                                                                                | Signaling     |
| DHR11:29748301 | 11  | 29748301  | 29748400  | 100    | 1         | 4.28E-05 | 2.0948911  | 1     | 1           |                                                                                                                                                                                                                                                                                                                                                                                      |               |
| DHR11:88456301 | 11  | 88456301  | 88456400  | 100    | 1         | 1.93E-05 | 2.48624    | 1     | 1           | Spag6l                                                                                                                                                                                                                                                                                                                                                                               |               |
| DHR14:9915401  | 14  | 9915401   | 9915700   | 300    | 1         | 1.50E-05 | 1.8401882  | 5     | 1.667       | RF00026                                                                                                                                                                                                                                                                                                                                                                              |               |
| DHR16:64977901 | 16  | 64977901  | 64979400  | 1500   | 1         | 2.21E-06 | -1.8310873 | 8     | 0.533       | AABR07026125.1                                                                                                                                                                                                                                                                                                                                                                       |               |
| DHR17:9593901  | 17  | 9593901   | 9594100   | 200    | 1         | 2.58E-05 | -2.03422   | 0     | 0           | Fam193b                                                                                                                                                                                                                                                                                                                                                                              |               |
| DHR17:89385901 | 17  | 89385901  | 89397000  | 11100  | 8         | 8.81E-06 | 0.9173086  | 85    | 0.766       |                                                                                                                                                                                                                                                                                                                                                                                      |               |
| DHR17:89407501 | 17  | 89407501  | 89411400  | 3900   | 2         | 2.38E-06 | 0.8960897  | 24    | 0.615       |                                                                                                                                                                                                                                                                                                                                                                                      |               |
| DHR17:89412901 | 17  | 89412901  | 89419800  | 6900   | 2         | 3.42E-06 | 0.8262896  | 70    | 1.014       |                                                                                                                                                                                                                                                                                                                                                                                      |               |
| DHR17:89427001 | 17  | 89427001  | 89429000  | 2000   | 1         | 9.46E-05 | 0.9245905  | 19    | 0.95        |                                                                                                                                                                                                                                                                                                                                                                                      |               |
| DHR17:89430101 | 17  | 89430101  | 89442300  | 12200  | 14        | 1.26E-07 | 1.1382655  | 72    | 0.59        |                                                                                                                                                                                                                                                                                                                                                                                      |               |
| DHR17:89443401 | 17  | 89443401  | 89446600  | 3200   | 2         | 3.89E-06 | 0.883254   | 20    | 0.625       | AABR07028872.1                                                                                                                                                                                                                                                                                                                                                                       |               |
| DHR17:89449601 | 17  | 89449601  | 89464100  | 14500  | 6         | 1.57E-06 | 1.0509194  | 97    | 0.669       | AABR07028872.1                                                                                                                                                                                                                                                                                                                                                                       |               |
| DHR19:26948701 | 19  | 26948701  | 26949900  | 1200   | 1         | 4.14E-05 | -1.9110613 | 3     | 0.25        | AABR07043271.1                                                                                                                                                                                                                                                                                                                                                                       |               |
| DHR20:5403801  | 20  | 5403801   | 5403900   | 100    | 1         | 1.62E-05 | 2.1069568  | 1     | 1           | RT1-A1                                                                                                                                                                                                                                                                                                                                                                               | Immune        |
| DHRMT:1        | MT  | 1         | 16300     | 16300  | 1         | 8.68E-05 | 1.938918   | 303   | 1.859       | AY172581.13;AY172581.9;AY172581.3;AY172581.24;AY172581.14;Mt-nd1;AY172581.4;AY172581.21;AY172581.15;Mt-nd2;AY172581.6;AY172581.22;AY172581.18;AY172581.10;AY172581.7;Mt-co1;AY172581.19;AY172581.12;Mt-co2;AY172581.1;Mt-atp8;Mt-atp6;Mt-co3;AY172581.5;Mt-nd3;AY172581.16;Mt-nd4l;Mt-nd4;AY172581.23;AY172581.17;AY172581.11;Mt-nd5;Mt-nd6;AY172581.20;Mt-cyb;AY172581.8;AY172581.2 |               |
| DHRX:166201    | X   | 166201    | 169800    | 3600   | 1         | 6.97E-05 | -1.5857853 | 32    | 0.889       |                                                                                                                                                                                                                                                                                                                                                                                      |               |
| DHRX:53575901  | X   | 53575901  | 53576600  | 700    | 1         | 5.66E-05 | 1.931926   | 5     | 0.714       |                                                                                                                                                                                                                                                                                                                                                                                      |               |

**(D) DDT H3k27me Caput DHR List**

| DHR Name       | Chr | Start     | Stop      | Length | # Sig Win | minP     | maxLFC     | CpG # | CpG Density | Gene Annotation | Gene Category |
|----------------|-----|-----------|-----------|--------|-----------|----------|------------|-------|-------------|-----------------|---------------|
| DHR1:70907101  | 1   | 70907101  | 70907200  | 100    | 1         | 1.53E-05 | -2.489312  | 0     | 0           |                 |               |
| DHR1:71755701  | 1   | 71755701  | 71755800  | 100    | 1         | 7.11E-05 | 1.7943801  | 0     | 0           |                 |               |
| DHR1:180311301 | 1   | 180311301 | 180311400 | 100    | 1         | 4.17E-05 | 1.8668297  | 0     | 0           |                 |               |
| DHR1:181455001 | 1   | 181455001 | 181455100 | 100    | 1         | 6.67E-05 | -1.9727694 | 0     | 0           |                 |               |
| DHR1:182734301 | 1   | 182734301 | 182734500 | 200    | 1         | 2.53E-05 | -1.8334011 | 0     | 0           |                 |               |
| DHR2:10029601  | 2   | 10029601  | 10030800  | 1200   | 1         | 3.65E-05 | -1.781232  | 12    | 1           |                 |               |
| DHR2:114604901 | 2   | 114604901 | 114605300 | 400    | 1         | 2.51E-05 | -1.9283691 | 1     | 0.25        |                 |               |
| DHR2:156562501 | 2   | 156562501 | 156563200 | 700    | 1         | 7.83E-05 | 1.1430675  | 4     | 0.571       |                 |               |
| DHR2:224898001 | 2   | 224898001 | 224898500 | 500    | 1         | 6.07E-05 | 1.3111959  | 0     | 0           | Alg14;RF00100   | Metabolism    |
| DHR3:42647801  | 3   | 42647801  | 42648000  | 200    | 1         | 9.99E-05 | -1.9414692 | 6     | 3           |                 |               |
| DHR3:44869001  | 3   | 44869001  | 44872000  | 3000   | 1         | 2.58E-05 | 2.1318664  | 34    | 1.133       |                 |               |
| DHR3:89442901  | 3   | 89442901  | 89444400  | 1500   | 1         | 5.80E-05 | 1.7299868  | 14    | 0.933       |                 |               |
| DHR3:96403801  | 3   | 96403801  | 96404100  | 300    | 1         | 2.63E-05 | -2.0102333 | 2     | 0.667       |                 |               |
| DHR4:78546201  | 4   | 78546201  | 78546500  | 300    | 1         | 3.40E-05 | -1.5692853 | 9     | 3           |                 |               |
| DHR4:127911001 | 4   | 127911001 | 127911400 | 400    | 1         | 4.28E-05 | 1.9155166  | 1     | 0.25        |                 |               |
| DHR5:9556601   | 5   | 9556601   | 9557700   | 1100   | 1         | 7.77E-07 | -3.0284625 | 6     | 0.545       |                 |               |
| DHR6:22240501  | 6   | 22240501  | 22240600  | 100    | 1         | 7.53E-06 | -3.0283673 | 1     | 1           | Spast           | Cytoskeleton  |
| DHR6:42044401  | 6   | 42044401  | 42044500  | 100    | 1         | 1.57E-05 | 2.6984274  | 1     | 1           |                 |               |
| DHR6:57976301  | 6   | 57976301  | 57976600  | 300    | 1         | 6.26E-05 | 1.7031723  | 4     | 1.333       | Dgkb            | Signaling     |
| DHR6:125468301 | 6   | 125468301 | 125468600 | 300    | 1         | 3.90E-05 | -2.3083576 | 1     | 0.333       | Tc2n            | Unknown       |
| DHR7:21792801  | 7   | 21792801  | 21794600  | 1800   | 1         | 3.92E-06 | -2.0778377 | 4     | 0.222       |                 |               |
| DHR7:53450201  | 7   | 53450201  | 53451800  | 1600   | 1         | 6.69E-05 | 1.4569245  | 8     | 0.5         |                 |               |
| DHR7:111810801 | 7   | 111810801 | 111811000 | 200    | 1         | 4.25E-05 | -2.0282375 | 1     | 0.5         |                 |               |
| DHR8:55594001  | 8   | 55594001  | 55594200  | 200    | 1         | 6.08E-05 | 2.0660192  | 1     | 0.5         | Pou2af1         |               |
| DHR9:8908501   | 9   | 8908501   | 8909600   | 1100   | 1         | 7.00E-05 | 1.2507139  | 4     | 0.364       | AABR07066440.1  |               |
| DHR9:14851001  | 9   | 14851001  | 14853200  | 2200   | 1         | 2.29E-05 | -1.9566516 | 27    | 1.227       | LOC680920       |               |
| DHR9:19111001  | 9   | 19111001  | 19111100  | 100    | 1         | 7.11E-05 | 1.867011   | 0     | 0           |                 |               |
| DHR9:33514801  | 9   | 33514801  | 33515000  | 200    | 1         | 4.25E-05 | 1.7155183  | 1     | 0.5         |                 |               |
| DHR9:102824301 | 9   | 102824301 | 102824800 | 500    | 1         | 5.39E-06 | 2.0146964  | 5     | 1           |                 |               |
| DHR11:16967801 | 11  | 16967801  | 16968000  | 200    | 1         | 9.99E-05 | -1.8396467 | 3     | 1.5         |                 |               |
| DHR11:90459201 | 11  | 90459201  | 90459500  | 300    | 1         | 5.74E-05 | 1.7160926  | 0     | 0           |                 |               |
| DHR12:20390101 | 12  | 20390101  | 20390400  | 300    | 1         | 2.53E-05 | 1.703242   | 1     | 0.333       |                 |               |
| DHR12:34648701 | 12  | 34648701  | 34650100  | 1400   | 1         | 7.40E-05 | -1.5622263 | 12    | 0.857       | AABR07036101.1  |               |
| DHR12:35322101 | 12  | 35322101  | 35322200  | 100    | 1         | 3.90E-05 | -2.6093027 | 0     | 0           | AABR07036167.1  |               |
| DHR13:2497401  | 13  | 2497401   | 2498400   | 1000   | 1         | 2.18E-05 | -2.5684331 | 7     | 0.7         |                 |               |
| DHR13:10343201 | 13  | 10343201  | 10343300  | 100    | 1         | 4.12E-05 | -1.8092185 | 0     | 0           |                 |               |
| DHR13:27598401 | 13  | 27598401  | 27599000  | 600    | 1         | 3.51E-06 | -2.6844605 | 3     | 0.5         |                 |               |
| DHR13:44280401 | 13  | 44280401  | 44280500  | 100    | 1         | 2.26E-05 | -2.5706118 | 0     | 0           | Tmem163         | Unknown       |
| DHR13:89445601 | 13  | 89445601  | 89446900  | 1300   | 1         | 6.23E-05 | 0.734331   | 32    | 2.462       |                 |               |
| DHR13:90145301 | 13  | 90145301  | 90149300  | 4000   | 2         | 7.03E-07 | -2.5727432 | 47    | 1.175       | Cd48            | Immune        |
| DHR14:49671601 | 14  | 49671601  | 49671800  | 200    | 1         | 5.30E-05 | -1.6759196 | 3     | 1.5         |                 |               |
| DHR14:57716401 | 14  | 57716401  | 57716700  | 300    | 1         | 8.08E-06 | 2.1545343  | 4     | 1.333       |                 |               |
| DHR14:62887601 | 14  | 62887601  | 62890500  | 2900   | 1         | 6.11E-05 | 1.7076266  | 33    | 1.138       |                 |               |
| DHR14:88206001 | 14  | 88206001  | 88206400  | 400    | 1         | 9.65E-05 | -1.5894688 | 2     | 0.5         | AABR07015966.1  |               |
| DHR15:65051101 | 15  | 65051101  | 65052000  | 900    | 1         | 2.43E-05 | -1.8995916 | 3     | 0.333       |                 |               |
| DHR16:370101   | 16  | 370101    | 370400    | 300    | 1         | 9.99E-05 | -1.7458613 | 2     | 0.667       |                 |               |
| DHR16:18258501 | 16  | 18258501  | 18258800  | 300    | 1         | 4.28E-05 | 1.9622014  | 2     | 0.667       |                 |               |
| DHR16:48633301 | 16  | 48633301  | 48633500  | 200    | 1         | 8.10E-05 | 1.734609   | 1     | 0.5         | Irf2            | Transcription |
| DHR17:9924401  | 17  | 9924401   | 9924500   | 100    | 1         | 2.74E-06 | 2.2135466  | 0     | 0           | Nsd1            | Transcription |
| DHR17:48421401 | 17  | 48421401  | 48422000  | 600    | 1         | 9.55E-05 | -1.8054309 | 1     | 0.167       | Amph            | Receptor      |
| DHR17:76671301 | 17  | 76671301  | 76671400  | 100    | 1         | 7.46E-07 | 2.008938   | 0     | 0           | Camk1d          | Signaling     |
| DHR17:89385101 | 17  | 89385101  | 89396900  | 11800  | 1         | 6.49E-05 | 0.6135299  | 88    | 0.746       |                 |               |
| DHR17:89467401 | 17  | 89467401  | 89468800  | 1400   | 1         | 1.43E-05 | 0.750213   | 4     | 0.286       |                 |               |
| DHR18:35242001 | 18  | 35242001  | 35242500  | 500    | 1         | 1.96E-05 | 1.665367   | 4     | 0.8         | Spink6          |               |
| DHR18:80520201 | 18  | 80520201  | 80520400  | 200    | 2         | 2.79E-07 | -2.3767607 | 2     | 1           |                 |               |
| DHR19:29249401 | 19  | 29249401  | 29250500  | 1100   | 1         | 4.25E-05 | -2.0281187 | 7     | 0.636       | AABR07043564.1  |               |

|                |    |          |          |      |   |          |            |    |       |                     |           |
|----------------|----|----------|----------|------|---|----------|------------|----|-------|---------------------|-----------|
| DHR20:2601501  | 20 | 2601501  | 2602400  | 900  | 1 | 8.77E-06 | -2.2065193 | 5  | 0.556 | AC120486.10;RF00100 |           |
| DHR20:40846901 | 20 | 40846901 | 40847000 | 100  | 1 | 9.00E-05 | 1.4905153  | 0  | 0     |                     |           |
| DHR20:45928401 | 20 | 45928401 | 45928500 | 100  | 1 | 4.32E-06 | -2.4890489 | 0  | 0     | Fig4                | Signaling |
| DHRX:80441601  | X  | 80441601 | 80443500 | 1900 | 1 | 1.41E-05 | -2.6152897 | 7  | 0.368 |                     |           |
| DHRX:80454401  | X  | 80454401 | 80457200 | 2800 | 1 | 2.43E-05 | 1.6919803  | 11 | 0.393 |                     |           |
| DHRY:2908201   | Y  | 2908201  | 2909200  | 1000 | 1 | 7.89E-05 | 1.4284113  | 9  | 0.9   |                     |           |

## (E) DDT H3k27me Cauda DHR List

| DHR Name        | Chr | Start     | Stop      | Length | # Sig Win | minP     | maxLFC     | CpG # | CpG Density | Gene Annotation                                                                                                                                                                                                                                                                                                                                                                      | Gene Category |
|-----------------|-----|-----------|-----------|--------|-----------|----------|------------|-------|-------------|--------------------------------------------------------------------------------------------------------------------------------------------------------------------------------------------------------------------------------------------------------------------------------------------------------------------------------------------------------------------------------------|---------------|
| DHR2:160690101+ | 2   | 160690101 | 160695700 | 5600   | 2         | 3.30E-05 | 0.7548302  | 88    | 1.571       |                                                                                                                                                                                                                                                                                                                                                                                      |               |
| DHR2:160933601  | 2   | 160933601 | 160934000 | 400    | 1         | 3.61E-06 | 0.8047662  | 4     | 1           |                                                                                                                                                                                                                                                                                                                                                                                      |               |
| DHR3:96693901   | 3   | 96693901  | 96694100  | 200    | 1         | 1.52E-05 | 2.3496442  | 0     | 0           |                                                                                                                                                                                                                                                                                                                                                                                      |               |
| DHR3:133562601  | 3   | 133562601 | 133568300 | 5700   | 1         | 6.55E-06 | 0.8130422  | 82    | 1.439       |                                                                                                                                                                                                                                                                                                                                                                                      |               |
| DHR4:33182001   | 4   | 33182001  | 33182700  | 700    | 1         | 5.11E-05 | 1.4469118  | 6     | 0.857       | AABR07059723.1                                                                                                                                                                                                                                                                                                                                                                       |               |
| DHR4:146538701  | 4   | 146538701 | 146543900 | 5200   | 1         | 1.92E-05 | -0.4286636 | 158   | 3.038       |                                                                                                                                                                                                                                                                                                                                                                                      |               |
| DHR4:146545401  | 4   | 146545401 | 146548900 | 3500   | 1         | 4.65E-07 | -0.5473785 | 104   | 2.971       |                                                                                                                                                                                                                                                                                                                                                                                      |               |
| DHR5:6372801    | 5   | 6372801   | 6374500   | 1700   | 5         | 2.42E-07 | -1.9076657 | 30    | 1.765       | AABR07046778.1                                                                                                                                                                                                                                                                                                                                                                       |               |
| DHR5:24717401   | 5   | 24717401  | 24719900  | 2500   | 1         | 3.97E-05 | 1.1173524  | 15    | 0.6         | AABR07047221.1                                                                                                                                                                                                                                                                                                                                                                       |               |
| DHR5:146403201  | 5   | 146403201 | 146405700 | 2500   | 6         | 9.24E-06 | -1.7340314 | 7     | 0.28        | Csmd2                                                                                                                                                                                                                                                                                                                                                                                | Unknown       |
| DHR6:18759901   | 6   | 18759901  | 18760100  | 200    | 1         | 1.88E-05 | -2.0757935 | 1     | 0.5         |                                                                                                                                                                                                                                                                                                                                                                                      |               |
| DHR7:20152001   | 7   | 20152001  | 20154000  | 2000   | 1         | 4.22E-05 | -1.9283694 | 21    | 1.05        |                                                                                                                                                                                                                                                                                                                                                                                      |               |
| DHR7:21657301   | 7   | 21657301  | 21657400  | 100    | 1         | 6.61E-05 | 1.9913203  | 1     | 1           |                                                                                                                                                                                                                                                                                                                                                                                      |               |
| DHR7:27563201   | 7   | 27563201  | 27563600  | 400    | 1         | 1.03E-05 | -0.5131914 | 2     | 0.5         |                                                                                                                                                                                                                                                                                                                                                                                      |               |
| DHR7:114548401  | 7   | 114548401 | 114548600 | 200    | 1         | 2.57E-06 | -1.5908159 | 0     | 0           | Ptk2                                                                                                                                                                                                                                                                                                                                                                                 | Signaling     |
| DHR10:75365301  | 10  | 75365301  | 75365400  | 100    | 1         | 3.59E-05 | -2.3478315 | 0     | 0           | Vezf1                                                                                                                                                                                                                                                                                                                                                                                | Transcription |
| DHR14:46530801  | 14  | 46530801  | 46533400  | 2600   | 1         | 1.25E-05 | 0.6999735  | 59    | 2.269       | AABR07015055.1;AABR07015057.1;AABR07015055.2;AABR07015056.1                                                                                                                                                                                                                                                                                                                          |               |
| DHR14:46624601  | 14  | 46624601  | 46624800  | 200    | 1         | 6.50E-05 | 1.147842   | 6     | 3           | RF01518                                                                                                                                                                                                                                                                                                                                                                              |               |
| DHR14:46655901  | 14  | 46655901  | 46658400  | 2500   | 1         | 3.58E-05 | 0.6501733  | 79    | 3.16        | Rn5-8s;AABR07015078.1;AABR07015078.2;AABR07015079.1;AABR07015080.2;AABR07015081.2;AABR07015080.1;AABR07015081.1                                                                                                                                                                                                                                                                      |               |
| DHR17:89386101  | 17  | 89386101  | 89396500  | 10400  | 5         | 1.14E-05 | 1.0440628  | 74    | 0.712       |                                                                                                                                                                                                                                                                                                                                                                                      |               |
| DHR17:89430201  | 17  | 89430201  | 89442300  | 12100  | 4         | 1.76E-07 | 0.870951   | 72    | 0.595       |                                                                                                                                                                                                                                                                                                                                                                                      |               |
| DHR17:89443401  | 17  | 89443401  | 89446300  | 2900   | 3         | 8.09E-06 | 1.520874   | 19    | 0.655       | AABR07028872.1                                                                                                                                                                                                                                                                                                                                                                       |               |
| DHR17:89449601  | 17  | 89449601  | 89464100  | 14500  | 4         | 2.21E-05 | 1.4582651  | 97    | 0.669       | AABR07028872.1                                                                                                                                                                                                                                                                                                                                                                       |               |
| DHR18:80520201  | 18  | 80520201  | 80520300  | 100    | 1         | 2.52E-08 | -2.9402348 | 1     | 1           |                                                                                                                                                                                                                                                                                                                                                                                      |               |
| DHR18:81185001  | 18  | 81185001  | 81185300  | 300    | 1         | 6.22E-06 | 1.0538245  | 3     | 1           | Zfp407                                                                                                                                                                                                                                                                                                                                                                               | Transcription |
| DHR20:19484001  | 20  | 19484001  | 19485200  | 1200   | 3         | 8.84E-06 | -2.5624851 | 14    | 1.167       | Fam13c                                                                                                                                                                                                                                                                                                                                                                               |               |
| DHRMT:1         | MT  | 1         | 16300     | 16300  | 60        | 4.54E-10 | -2.1832911 | 303   | 1.859       | AY172581.13;AY172581.9;AY172581.3;AY172581.24;AY172581.14;Mt-nd1;AY172581.4;AY172581.21;AY172581.15;Mt-nd2;AY172581.6;AY172581.22;AY172581.18;AY172581.10;AY172581.7;Mt-co1;AY172581.19;AY172581.12;Mt-co2;AY172581.1;Mt-atp8;Mt-atp6;Mt-co3;AY172581.5;Mt-nd3;AY172581.16;Mt-nd4l;Mt-nd4;AY172581.23;AY172581.17;AY172581.11;Mt-nd5;Mt-nd6;AY172581.20;Mt-cyb;AY172581.8;AY172581.2 |               |
