# Supplementary material
Source: PubMed Central journal article supplement (PMC7484192)
Supplement: NIHMS1614283-supplement-8.pdf [file NIHMS1614283-supplement-8.pdf]

Supplemental Table S3

(A) Vinclozolin Round Spermatid DHR List

| DHR Name        | Chr | Start     | Stop      | Length | # Sig Win | minP     | maxLFC     | CpG # | CpG Density | Gene Annotation               | Gene Category                  |
|-----------------|-----|-----------|-----------|--------|-----------|----------|------------|-------|-------------|-------------------------------|--------------------------------|
| DHR1:24966001   | 1   | 24966001  | 24966600  | 600    | 1         | 5.46E-05 | 1.8781248  | 3     | 0.5         |                               |                                |
| DHR1:28532501   | 1   | 28532501  | 28532600  | 100    | 1         | 9.95E-05 | 2.1648947  | 1     | 1           | Tpd52l1                       |                                |
| DHR1:74369601   | 1   | 74369601  | 74369800  | 200    | 1         | 9.46E-05 | -1.7855978 | 0     | 0           |                               |                                |
| DHR1:94645801   | 1   | 94645801  | 94645900  | 100    | 1         | 5.44E-05 | -1.7198153 | 0     | 0           |                               |                                |
| DHR2:72810201   | 2   | 72810201  | 72811200  | 1000   | 1         | 3.38E-05 | -2.1073166 | 13    | 1.3         |                               |                                |
| DHR2:114565501  | 2   | 114565501 | 114565700 | 200    | 2         | 4.21E-10 | -2.293264  | 3     | 1.5         |                               |                                |
| DHR3:26885301   | 3   | 26885301  | 26885600  | 300    | 1         | 4.32E-05 | -1.0551756 | 2     | 0.667       |                               |                                |
| DHR3:52058501   | 3   | 52058501  | 52060200  | 1700   | 1         | 4.59E-05 | -1.3808385 | 8     | 0.471       | Csrnp3                        | Unknown                        |
| DHR3:149856501  | 3   | 149856501 | 149856700 | 200    | 2         | 1.00E-07 | -1.8463462 | 8     | 4           | Cdk5rap1                      | Signaling                      |
| DHR4:28391501   | 4   | 28391501  | 28391700  | 200    | 1         | 1.17E-07 | 3.0574432  | 0     | 0           |                               |                                |
| DHR4:33173201   | 4   | 33173201  | 33173500  | 300    | 1         | 1.79E-05 | 1.759499   | 2     | 0.667       | AABR07059723.1                |                                |
| DHR4:44708001   | 4   | 44708001  | 44708300  | 300    | 1         | 1.06E-05 | -1.2455348 | 3     | 1           |                               |                                |
| DHR5:38490001   | 5   | 38490001  | 38490200  | 200    | 1         | 5.32E-05 | -1.7827243 | 3     | 1.5         |                               |                                |
| DHR5:71284201   | 5   | 71284201  | 71284600  | 400    | 1         | 9.07E-05 | 1.3591066  | 2     | 0.5         |                               |                                |
| DHR5:74897201   | 5   | 74897201  | 74897300  | 100    | 1         | 1.11E-05 | -2.5516221 | 5     | 5           | AC134204.1;Akap2;RF00017      | Signaling                      |
| DHR6:10806501   | 6   | 10806501  | 10808000  | 1500   | 1         | 7.82E-05 | -2.2457624 | 61    | 4.067       |                               |                                |
| DHR6:31066001   | 6   | 31066001  | 31066800  | 800    | 1         | 8.19E-06 | -1.1437041 | 7     | 0.875       |                               |                                |
| DHR6:47096201   | 6   | 47096201  | 47097800  | 1600   | 1         | 1.57E-05 | -2.0684561 | 15    | 0.938       |                               |                                |
| DHR6:81595201   | 6   | 81595201  | 81595400  | 200    | 1         | 6.99E-05 | -1.9843014 | 2     | 1           |                               |                                |
| DHR6:128249301  | 6   | 128249301 | 128249400 | 100    | 1         | 2.74E-05 | -2.1535597 | 0     | 0           |                               |                                |
| DHR7:21663501   | 7   | 21663501  | 21665300  | 1800   | 1         | 2.92E-05 | 1.5037687  | 10    | 0.556       |                               |                                |
| DHR7:63898201   | 7   | 63898201  | 63898400  | 200    | 1         | 9.35E-05 | 1.3508108  | 0     | 0           |                               |                                |
| DHR8:39893001   | 8   | 39893001  | 39893300  | 300    | 3         | 4.22E-09 | 1.6927169  | 0     | 0           | LOC100911068;Robo3            | Extracellular Matrix; Receptor |
| DHR8:41832301   | 8   | 41832301  | 41832400  | 100    | 1         | 2.58E-05 | -2.1466546 | 0     | 0           |                               |                                |
| DHR9:8459801    | 9   | 8459801   | 8460100   | 300    | 1         | 1.13E-05 | 1.8912368  | 3     | 1           |                               |                                |
| DHR9:21886501   | 9   | 21886501  | 21887300  | 800    | 1         | 4.20E-05 | 1.6797412  | 7     | 0.875       |                               |                                |
| DHR10:111140601 | 10  | 111140601 | 111140700 | 100    | 1         | 8.92E-05 | 2.1496144  | 1     | 1           |                               |                                |
| DHR14:46619501  | 14  | 46619501  | 46624300  | 4800   | 2         | 8.49E-06 | -0.972726  | 69    | 1.438       | RF01518                       |                                |
| DHR14:91544901  | 14  | 91544901  | 91546200  | 1300   | 1         | 7.69E-05 | 1.9671448  | 40    | 3.077       | Zbp                           | Development                    |
| DHR15:95218401  | 15  | 95218401  | 95218500  | 100    | 1         | 3.60E-06 | -2.4692036 | 0     | 0           |                               |                                |
| DHR16:58844901  | 16  | 58844901  | 58845000  | 100    | 1         | 6.05E-07 | -2.3134362 | 1     | 1           | AABR07026012.1;AABR07026004.1 |                                |
| DHR16:64917001  | 16  | 64917001  | 64918600  | 1600   | 1         | 1.06E-07 | 2.1345328  | 5     | 0.312       | AABR07026120.1                |                                |
| DHR16:64920101  | 16  | 64920101  | 64924300  | 4200   | 1         | 5.04E-06 | 1.7737398  | 21    | 0.5         | AABR07026120.1                |                                |
| DHR16:64930301  | 16  | 64930301  | 64935800  | 5500   | 1         | 1.94E-05 | 1.2329167  | 30    | 0.545       | AABR07026120.1                |                                |
| DHR16:64975301  | 16  | 64975301  | 64979500  | 4200   | 1         | 3.80E-06 | 1.6820474  | 23    | 0.548       | AABR07026125.1                |                                |
| DHR17:76671301  | 17  | 76671301  | 76671400  | 100    | 1         | 2.92E-05 | 1.820256   | 0     | 0           | Camk1d                        | Signaling                      |
| DHR18:37041501  | 18  | 37041501  | 37041700  | 200    | 2         | 5.16E-07 | -1.4189023 | 0     | 0           | Ppp2r2b                       | Signaling                      |
| DHR19:15044401  | 19  | 15044401  | 15049000  | 4600   | 3         | 3.90E-07 | -1.8082477 | 143   | 3.109       | Ces1d                         | Metabolism                     |
| DHR19:26959901  | 19  | 26959901  | 26960000  | 100    | 1         | 2.87E-05 | -2.1889803 | 2     | 2           |                               |                                |
| DHR19:27225201  | 19  | 27225201  | 27225300  | 100    | 1         | 8.49E-05 | 1.6930147  | 0     | 0           |                               |                                |
| DHR19:43906101  | 19  | 43906101  | 43906300  | 200    | 1         | 2.58E-05 | -2.1467091 | 0     | 0           | Ctrb1;AC114198.1              | Protease                       |
| DHR20:133101    | 20  | 133101    | 134700    | 1600   | 1         | 6.16E-05 | -1.4414504 | 17    | 1.062       |                               |                                |
| DHR20:2587201   | 20  | 2587201   | 2588100   | 900    | 1         | 6.01E-05 | -1.6472221 | 5     | 0.556       | AC120486.10                   |                                |
| DHR20:5405101   | 20  | 5405101   | 5406600   | 1500   | 2         | 2.79E-05 | 1.8770364  | 9     | 0.6         | RT1-A1                        | Immune                         |
| DHRX:119756301  | X   | 119756301 | 119757200 | 900    | 1         | 3.49E-05 | -2.1145715 | 6     | 0.667       |                               |                                |
| DHRX:150485701  | X   | 150485701 | 150487200 | 1500   | 2         | 6.89E-07 | 1.7234528  | 8     | 0.533       |                               |                                |
| DHRX:150523801  | X   | 150523801 | 150524500 | 700    | 1         | 5.40E-05 | 1.7312293  | 4     | 0.571       |                               |                                |
| DHRX:150617001  | X   | 150617001 | 150619100 | 2100   | 1         | 6.11E-05 | 1.7290997  | 11    | 0.524       |                               |                                |
| DHRX:155840301  | X   | 155840301 | 155840500 | 200    | 1         | 8.46E-05 | -1.3726615 | 3     | 1.5         | Dkc1                          | Transcription                  |

**(B) Vinclozolin Caput DHR List**

| DHR Name       | Chr | Start     | Stop      | Length | # Sig Win | minP     | maxLFC     | CpG # | CpG Density | Gene Annotation                                             | Gene Category                 |
|----------------|-----|-----------|-----------|--------|-----------|----------|------------|-------|-------------|-------------------------------------------------------------|-------------------------------|
| DHR1:38064501  | 1   | 38064501  | 38065300  | 800    | 1         | 4.68E-05 | 1.148222   | 5     | 0.625       |                                                             |                               |
| DHR1:76468401  | 1   | 76468401  | 76470000  | 1600   | 1         | 3.90E-06 | 2.8705138  | 6     | 0.375       | Sult2a2                                                     | Metabolism                    |
| DHR1:77222401  | 1   | 77222401  | 77225900  | 3500   | 1         | 3.90E-05 | 2.1884884  | 11    | 0.314       |                                                             |                               |
| DHR1:97906101  | 1   | 97906101  | 97911500  | 5400   | 1         | 9.38E-06 | -1.7816414 | 14    | 0.259       |                                                             |                               |
| DHR1:148626701 | 1   | 148626701 | 148627400 | 700    | 1         | 6.28E-05 | 0.9280023  | 9     | 1.286       |                                                             |                               |
| DHR1:148650501 | 1   | 148650501 | 148653300 | 2800   | 1         | 2.76E-05 | 1.2628598  | 72    | 2.571       |                                                             |                               |
| DHR1:169135701 | 1   | 169135701 | 169135900 | 200    | 1         | 4.02E-05 | -2.1088751 | 1     | 0.5         | Olr136;LOC499219                                            |                               |
| DHR1:181483901 | 1   | 181483901 | 181484000 | 100    | 1         | 4.48E-06 | 2.1025637  | 0     | 0           |                                                             |                               |
| DHR2:2756201   | 2   | 2756201   | 2756400   | 200    | 1         | 4.95E-05 | -2.0056697 | 3     | 1.5         | Spata9                                                      | Development                   |
| DHR2:35057201  | 2   | 35057201  | 35057500  | 300    | 1         | 7.48E-05 | -1.6160433 | 5     | 1.667       |                                                             |                               |
| DHR2:49370601  | 2   | 49370601  | 49371000  | 400    | 1         | 2.03E-05 | -0.6963793 | 11    | 2.75        |                                                             |                               |
| DHR2:54463001  | 2   | 54463001  | 54463400  | 400    | 1         | 1.55E-05 | 2.0992573  | 7     | 1.75        | C6                                                          | Immune                        |
| DHR2:78637301  | 2   | 78637301  | 78637400  | 100    | 1         | 9.15E-05 | -1.869822  | 1     | 1           | AC115509.1                                                  |                               |
| DHR2:88614201  | 2   | 88614201  | 88614500  | 300    | 1         | 5.09E-05 | -1.7982404 | 3     | 1           | Slc7a12                                                     |                               |
| DHR2:112642801 | 2   | 112642801 | 112644000 | 1200   | 1         | 4.52E-05 | -2.054543  | 9     | 0.75        | Spata16                                                     |                               |
| DHR2:156155101 | 2   | 156155101 | 156157500 | 2400   | 1         | 8.30E-05 | 1.7209265  | 13    | 0.542       |                                                             |                               |
| DHR2:156933801 | 2   | 156933801 | 156935800 | 2000   | 1         | 7.72E-05 | -1.4483953 | 9     | 0.45        |                                                             |                               |
| DHR2:179209201 | 2   | 179209201 | 179209500 | 300    | 1         | 3.65E-05 | 1.8855022  | 1     | 0.333       |                                                             |                               |
| DHR2:197496601 | 2   | 197496601 | 197497600 | 1000   | 1         | 5.01E-05 | 1.9049775  | 12    | 1.2         |                                                             |                               |
| DHR2:197509101 | 2   | 197509101 | 197509200 | 100    | 1         | 8.19E-05 | 2.1038046  | 0     | 0           |                                                             |                               |
| DHR3:41423301  | 3   | 41423301  | 41424500  | 1200   | 1         | 1.50E-05 | -1.9080824 | 8     | 0.667       |                                                             |                               |
| DHR3:60071001  | 3   | 60071001  | 60073200  | 2200   | 1         | 3.12E-05 | -2.062925  | 21    | 0.955       | Gpr155                                                      | Receptor                      |
| DHR3:70058201  | 3   | 70058201  | 70058600  | 400    | 1         | 4.20E-05 | -1.6614812 | 20    | 5           |                                                             |                               |
| DHR3:83670001  | 3   | 83670001  | 83672900  | 2900   | 1         | 9.98E-05 | -1.6788745 | 25    | 0.862       |                                                             |                               |
| DHR3:96274901  | 3   | 96274901  | 96275200  | 300    | 1         | 6.36E-05 | 2.0739084  | 11    | 3.667       |                                                             |                               |
| DHR3:96665701  | 3   | 96665701  | 96666200  | 500    | 1         | 3.78E-06 | 2.5329201  | 4     | 0.8         |                                                             |                               |
| DHR3:133804501 | 3   | 133804501 | 133806400 | 1900   | 1         | 8.55E-05 | 1.8712076  | 7     | 0.368       |                                                             |                               |
| DHR3:149735001 | 3   | 149735001 | 149735500 | 500    | 2         | 1.01E-05 | 1.5510415  | 9     | 1.8         | Cdk5rap1;AABR07054355.1                                     | Signaling                     |
| DHR3:149856501 | 3   | 149856501 | 149856700 | 200    | 2         | 3.59E-05 | -1.371256  | 8     | 4           | Cdk5rap1                                                    | Signaling                     |
| DHR3:167217901 | 3   | 167217901 | 167218000 | 100    | 1         | 6.51E-05 | 1.9104726  | 0     | 0           | AABR07054705.2;AABR07054705.1                               |                               |
| DHR4:33167901  | 4   | 33167901  | 33168400  | 500    | 1         | 6.64E-05 | 2.3015806  | 2     | 0.4         |                                                             |                               |
| DHR4:44149601  | 4   | 44149601  | 44150600  | 1000   | 1         | 9.40E-06 | 2.2499572  | 14    | 1.4         |                                                             |                               |
| DHR4:53722101  | 4   | 53722101  | 53722400  | 300    | 1         | 3.62E-06 | 2.6060229  | 12    | 4           |                                                             |                               |
| DHR4:68984201  | 4   | 68984201  | 68984400  | 200    | 1         | 3.18E-06 | -2.2299728 | 2     | 1           | Mgam                                                        | Metabolism                    |
| DHR4:135083301 | 4   | 135083301 | 135083500 | 200    | 1         | 3.38E-05 | -1.0192474 | 0     | 0           |                                                             |                               |
| DHR5:121186501 | 5   | 121186501 | 121187200 | 700    | 1         | 2.22E-05 | 1.5980738  | 3     | 0.429       |                                                             |                               |
| DHR6:30408201  | 6   | 30408201  | 30410700  | 2500   | 1         | 3.40E-05 | 1.6694043  | 30    | 1.2         |                                                             |                               |
| DHR6:30646201  | 6   | 30646201  | 30647800  | 1600   | 1         | 3.50E-05 | 0.8819361  | 19    | 1.188       | AABR07063424.1;AABR07063425.3;AABR07063425.2;AABR07063425.1 |                               |
| DHR6:42044401  | 6   | 42044401  | 42044500  | 100    | 1         | 4.76E-10 | 3.5164494  | 1     | 1           |                                                             |                               |
| DHR6:79761301  | 6   | 79761301  | 79762100  | 800    | 1         | 9.98E-05 | -1.9116635 | 10    | 1.25        |                                                             |                               |
| DHR6:90605101  | 6   | 90605101  | 90605200  | 100    | 1         | 4.12E-05 | 1.9961115  | 0     | 0           |                                                             |                               |
| DHR6:94113401  | 6   | 94113401  | 94113500  | 100    | 1         | 6.66E-05 | -1.8704583 | 0     | 0           |                                                             |                               |
| DHR6:125678301 | 6   | 125678301 | 125678400 | 100    | 1         | 2.43E-05 | 2.0007344  | 1     | 1           | Fbln5                                                       | Signaling                     |
| DHR6:138891101 | 6   | 138891101 | 138892400 | 1300   | 1         | 6.21E-05 | 2.444957   | 12    | 0.923       | AABR07065656.3                                              |                               |
| DHR7:22032101  | 7   | 22032101  | 22032300  | 200    | 1         | 8.95E-05 | 1.5067294  | 1     | 0.5         |                                                             |                               |
| DHR7:22595801  | 7   | 22595801  | 22597100  | 1300   | 1         | 6.72E-05 | 2.2155469  | 11    | 0.846       |                                                             |                               |
| DHR7:124908501 | 7   | 124908501 | 124909200 | 700    | 1         | 9.53E-07 | 1.5384919  | 6     | 0.857       | Efcab6                                                      | Signaling                     |
| DHR8:39893001  | 8   | 39893001  | 39893300  | 300    | 3         | 2.54E-19 | 1.800967   | 0     | 0           | LOC100911068;Robo3                                          | Extracellular Matrix;Receptor |
| DHR9:1403401   | 9   | 1403401   | 1404800   | 1400   | 1         | 1.08E-05 | 1.1632516  | 11    | 0.786       | Tbc1d5                                                      | Signaling                     |
| DHR9:21833501  | 9   | 21833501  | 21835100  | 1600   | 1         | 1.45E-05 | 2.5279101  | 8     | 0.5         |                                                             |                               |
| DHR9:84785101  | 9   | 84785101  | 84785300  | 200    | 1         | 3.91E-05 | -1.8698639 | 4     | 2           |                                                             |                               |
| DHR9:90509601  | 9   | 90509601  | 90510400  | 800    | 1         | 9.41E-05 | -1.7499322 | 6     | 0.75        |                                                             |                               |
| DHR9:95714401  | 9   | 95714401  | 95715800  | 1400   | 2         | 3.91E-05 | -1.9613943 | 13    | 0.929       |                                                             |                               |
| DHR10:854401   | 10  | 854401    | 854500    | 100    | 1         | 2.66E-08 | 3.8621674  | 0     | 0           | Myh11;Nde1                                                  | Cytoskeleton;Development      |
| DHR10:35027801 | 10  | 35027801  | 35028200  | 400    | 1         | 7.75E-05 | -1.8723489 | 0     | 0           | Trappc2b                                                    |                               |

|                |    |           |           |      |   |          |            |    |       |                          |         |
|----------------|----|-----------|-----------|------|---|----------|------------|----|-------|--------------------------|---------|
| DHR11:4627401  | 11 | 4627401   | 4627500   | 100  | 1 | 6.66E-05 | -2.0025146 | 3  | 3     |                          |         |
| DHR11:13643801 | 11 | 13643801  | 13643900  | 100  | 1 | 4.95E-06 | -2.4503591 | 0  | 0     |                          |         |
| DHR11:21446501 | 11 | 21446501  | 21448600  | 2100 | 1 | 1.70E-05 | -2.1071687 | 20 | 0.952 |                          |         |
| DHR11:26219101 | 11 | 26219101  | 26219300  | 200  | 1 | 2.58E-05 | -1.8705042 | 1  | 0.5   |                          |         |
| DHR12:79901    | 12 | 79901     | 80800     | 900  | 1 | 8.46E-05 | -1.9229714 | 11 | 1.222 |                          |         |
| DHR12:49142201 | 12 | 49142201  | 49142300  | 100  | 1 | 9.04E-05 | -1.9171772 | 0  | 0     |                          |         |
| DHR13:5845201  | 13 | 5845201   | 5846400   | 1200 | 1 | 7.18E-05 | 2.112572   | 7  | 0.583 |                          |         |
| DHR13:33489301 | 13 | 33489301  | 33490200  | 900  | 3 | 2.15E-05 | -0.6357947 | 23 | 2.556 |                          |         |
| DHR13:37729301 | 13 | 37729301  | 37729900  | 600  | 1 | 1.33E-05 | -1.9088349 | 11 | 1.833 |                          |         |
| DHR14:33201101 | 14 | 33201101  | 33203000  | 1900 | 1 | 7.38E-05 | 1.7470921  | 20 | 1.053 |                          |         |
| DHR14:48287101 | 14 | 48287101  | 48287300  | 200  | 1 | 7.07E-05 | -1.8709591 | 0  | 0     |                          |         |
| DHR14:74640201 | 14 | 74640201  | 74642200  | 2000 | 1 | 4.25E-05 | -1.9600423 | 17 | 0.85  |                          |         |
| DHR15:296301   | 15 | 296301    | 297700    | 1400 | 1 | 2.68E-05 | -1.8758501 | 11 | 0.786 |                          |         |
| DHR15:5475001  | 15 | 5475001   | 5476400   | 1400 | 2 | 1.25E-05 | 1.5509238  | 10 | 0.714 | Spetex-2F;AABR07016950.1 | Unknown |
| DHR15:32025701 | 15 | 32025701  | 32025800  | 100  | 1 | 2.17E-05 | 2.6220678  | 0  | 0     | AABR07017868.3           |         |
| DHR15:69398901 | 15 | 69398901  | 69399400  | 500  | 1 | 5.30E-05 | -1.7658911 | 9  | 1.8   |                          |         |
| DHR15:95219201 | 15 | 95219201  | 95220800  | 1600 | 1 | 9.98E-05 | -1.7904453 | 13 | 0.812 |                          |         |
| DHR15:97985001 | 15 | 97985001  | 97986000  | 1000 | 1 | 2.15E-07 | -2.2704182 | 9  | 0.9   |                          |         |
| DHR16:21832101 | 16 | 21832101  | 21832500  | 400  | 1 | 3.67E-05 | -0.7185273 | 2  | 0.5   |                          |         |
| DHR16:64976501 | 16 | 64976501  | 64982400  | 5900 | 1 | 9.20E-05 | 1.4320262  | 30 | 0.508 | AABR07026125.1           |         |
| DHR17:31794201 | 17 | 31794201  | 31796700  | 2500 | 1 | 1.78E-05 | -2.2803916 | 23 | 0.92  |                          |         |
| DHR17:38157801 | 17 | 38157801  | 38158000  | 200  | 1 | 8.12E-05 | -1.5139536 | 2  | 1     |                          |         |
| DHR17:42711701 | 17 | 42711701  | 42711900  | 200  | 1 | 9.98E-05 | -1.7905618 | 4  | 2     | Prl6a1                   |         |
| DHR17:74639101 | 17 | 74639101  | 74640700  | 1600 | 1 | 4.31E-05 | -1.5965871 | 14 | 0.875 |                          |         |
| DHR18:30636701 | 18 | 30636701  | 30636900  | 200  | 1 | 5.66E-05 | -1.6699068 | 4  | 2     |                          |         |
| DHR18:37497801 | 18 | 37497801  | 37497900  | 100  | 1 | 7.18E-05 | 1.868934   | 1  | 1     |                          |         |
| DHR18:80520201 | 18 | 80520201  | 80520400  | 200  | 2 | 3.20E-07 | -1.8348024 | 2  | 1     |                          |         |
| DHR19:26308301 | 19 | 26308301  | 26309700  | 1400 | 1 | 3.00E-05 | 1.6233477  | 15 | 1.071 |                          |         |
| DHR19:26433701 | 19 | 26433701  | 26436900  | 3200 | 1 | 3.97E-05 | 1.4528062  | 17 | 0.531 |                          |         |
| DHR19:28519301 | 19 | 28519301  | 28520900  | 1600 | 1 | 5.60E-05 | 1.573558   | 10 | 0.625 |                          |         |
| DHR19:28665301 | 19 | 28665301  | 28666600  | 1300 | 1 | 7.60E-05 | 1.4063702  | 5  | 0.385 | AABR07043453.1           |         |
| DHRX:18091501  | X  | 18091501  | 18094200  | 2700 | 1 | 3.88E-05 | 2.2125548  | 93 | 3.444 | AABR07037302.1           |         |
| DHRX:45238901  | X  | 45238901  | 45239500  | 600  | 1 | 4.95E-06 | 2.566187   | 4  | 0.667 | Pbsn                     |         |
| DHRX:66708601  | X  | 66708601  | 66708900  | 300  | 1 | 9.07E-05 | 2.0293419  | 6  | 2     |                          |         |
| DHRX:80454401  | X  | 80454401  | 80457200  | 2800 | 4 | 5.64E-06 | 2.2835326  | 11 | 0.393 |                          |         |
| DHRX:90719401  | X  | 90719401  | 90721000  | 1600 | 1 | 8.79E-05 | 1.9150196  | 20 | 1.25  |                          |         |
| DHRX:117342101 | X  | 117342101 | 117343200 | 1100 | 1 | 8.22E-05 | 1.8322742  | 7  | 0.636 |                          |         |
| DHRX:135622301 | X  | 135622301 | 135622400 | 100  | 1 | 3.45E-05 | -2.005393  | 0  | 0     |                          |         |

**(C) Vinclozolin Cauda DHR List**

| DHR Name       | Chr | Start     | Stop      | Length | # Sig Win | minP     | maxLFC     | CpG # | CpG Density | Gene Annotation    | Gene Category                 |
|----------------|-----|-----------|-----------|--------|-----------|----------|------------|-------|-------------|--------------------|-------------------------------|
| DHR1:181225901 | 1   | 181225901 | 181227700 | 1800   | 1         | 1.92E-05 | 1.6066553  | 46    | 2.556       |                    |                               |
| DHR1:195846501 | 1   | 195846501 | 195846700 | 200    | 1         | 6.24E-05 | 1.6128841  | 0     | 0           |                    |                               |
| DHR2:49370501  | 2   | 49370501  | 49371100  | 600    | 1         | 3.82E-05 | -1.0145022 | 16    | 2.667       |                    |                               |
| DHR2:150716401 | 2   | 150716401 | 150717000 | 600    | 1         | 5.13E-05 | 2.3434229  | 2     | 0.333       |                    |                               |
| DHR3:83513601  | 3   | 83513601  | 83513800  | 200    | 1         | 1.47E-05 | -1.8243194 | 0     | 0           |                    |                               |
| DHR3:149856501 | 3   | 149856501 | 149856700 | 200    | 2         | 1.85E-10 | -2.5994752 | 8     | 4           | Cdk5rap1           | Signaling                     |
| DHR3:170151901 | 3   | 170151901 | 170152100 | 200    | 1         | 2.17E-05 | -1.9376425 | 0     | 0           |                    |                               |
| DHR4:54839901  | 4   | 54839901  | 54840100  | 200    | 1         | 1.69E-05 | 2.6104605  | 5     | 2.5         | Grm8               | Receptor                      |
| DHR7:73275901  | 7   | 73275901  | 73276000  | 100    | 1         | 6.33E-06 | 2.5805315  | 0     | 0           | Rida;Pop1          | Transcription                 |
| DHR7:114548401 | 7   | 114548401 | 114548700 | 300    | 1         | 6.11E-05 | -1.5654741 | 1     | 0.333       | Ptk2               | Signaling                     |
| DHR8:39893001  | 8   | 39893001  | 39893300  | 300    | 2         | 4.89E-06 | 1.8339518  | 0     | 0           | LOC100911068;Robo3 | Extracellular Matrix;Receptor |
| DHR9:4804201   | 9   | 4804201   | 4804400   | 200    | 1         | 8.53E-05 | 1.5239031  | 1     | 0.5         | LOC100910526       | Metabolism                    |
| DHR9:12298701  | 9   | 12298701  | 12299400  | 700    | 1         | 6.56E-05 | -1.7066269 | 5     | 0.714       |                    |                               |
| DHR15:26183701 | 15  | 26183701  | 26183800  | 100    | 1         | 1.96E-05 | 3.025967   | 2     | 2           | Slc35f4            | Metabolism                    |
| DHR16:64917601 | 16  | 64917601  | 64918900  | 1300   | 1         | 1.56E-05 | 2.4511798  | 3     | 0.231       | AABR07026120.1     |                               |
| DHR17:9593901  | 17  | 9593901   | 9594100   | 200    | 1         | 2.06E-06 | -2.1794612 | 0     | 0           | Fam193b            |                               |
| DHR19:15046301 | 19  | 15046301  | 15048800  | 2500   | 1         | 7.52E-05 | -1.7495062 | 77    | 3.08        | Ces1d              | Metabolism                    |
| DHR1:181225901 | 1   | 181225901 | 181227700 | 1800   | 1         | 1.92E-05 | 1.6066553  | 46    | 2.556       |                    |                               |
| DHR1:195846501 | 1   | 195846501 | 195846700 | 200    | 1         | 6.24E-05 | 1.6128841  | 0     | 0           |                    |                               |
| DHR2:49370501  | 2   | 49370501  | 49371100  | 600    | 1         | 3.82E-05 | -1.0145022 | 16    | 2.667       |                    |                               |
| DHR2:150716401 | 2   | 150716401 | 150717000 | 600    | 1         | 5.13E-05 | 2.3434229  | 2     | 0.333       |                    |                               |
| DHR3:83513601  | 3   | 83513601  | 83513800  | 200    | 1         | 1.47E-05 | -1.8243194 | 0     | 0           |                    |                               |
| DHR3:149856501 | 3   | 149856501 | 149856700 | 200    | 2         | 1.85E-10 | -2.5994752 | 8     | 4           | Cdk5rap1           | Signaling                     |
| DHR3:170151901 | 3   | 170151901 | 170152100 | 200    | 1         | 2.17E-05 | -1.9376425 | 0     | 0           |                    |                               |
| DHR4:54839901  | 4   | 54839901  | 54840100  | 200    | 1         | 1.69E-05 | 2.6104605  | 5     | 2.5         | Grm8               | Receptor                      |
| DHR7:73275901  | 7   | 73275901  | 73276000  | 100    | 1         | 6.33E-06 | 2.5805315  | 0     | 0           | Rida;Pop1          | Transcription                 |
| DHR7:114548401 | 7   | 114548401 | 114548700 | 300    | 1         | 6.11E-05 | -1.5654741 | 1     | 0.333       | Ptk2               | Signaling                     |
| DHR8:39893001  | 8   | 39893001  | 39893300  | 300    | 2         | 4.89E-06 | 1.8339518  | 0     | 0           | LOC100911068;Robo3 | Extracellular Matrix;Receptor |
| DHR9:4804201   | 9   | 4804201   | 4804400   | 200    | 1         | 8.53E-05 | 1.5239031  | 1     | 0.5         | LOC100910526       | Metabolism                    |
| DHR9:12298701  | 9   | 12298701  | 12299400  | 700    | 1         | 6.56E-05 | -1.7066269 | 5     | 0.714       |                    |                               |
| DHR15:26183701 | 15  | 26183701  | 26183800  | 100    | 1         | 1.96E-05 | 3.025967   | 2     | 2           | Slc35f4            | Metabolism                    |
| DHR16:64917601 | 16  | 64917601  | 64918900  | 1300   | 1         | 1.56E-05 | 2.4511798  | 3     | 0.231       | AABR07026120.1     |                               |
| DHR17:9593901  | 17  | 9593901   | 9594100   | 200    | 1         | 2.06E-06 | -2.1794612 | 0     | 0           | Fam193b            |                               |
| DHR19:15046301 | 19  | 15046301  | 15048800  | 2500   | 1         | 7.52E-05 | -1.7495062 | 77    | 3.08        | Ces1d              | Metabolism                    |

**(D) Vinclozolin H3K27me Caput DHR List**

| DHR Name       | Chr | Start     | Stop      | Length | # Sig Win | minP     | maxLFC     | CpG # | CpG Density | Gene Annotation                    | Gene Category                 |
|----------------|-----|-----------|-----------|--------|-----------|----------|------------|-------|-------------|------------------------------------|-------------------------------|
| DHR1:70640701  | 1   | 70640701  | 70640900  | 200    | 1         | 2.52E-05 | 1.8598038  | 2     | 1           |                                    |                               |
| DHR1:75628401  | 1   | 75628401  | 75628600  | 200    | 1         | 1.56E-05 | -2.5193779 | 4     | 2           | Pla2g4c;AABR07002493.1             | Metabolism                    |
| DHR1:76443901  | 1   | 76443901  | 76445000  | 1100   | 2         | 3.06E-05 | 1.7360418  | 5     | 0.455       | Sult2a2                            | Metabolism                    |
| DHR1:76480801  | 1   | 76480801  | 76481500  | 700    | 1         | 4.24E-05 | 1.8959719  | 4     | 0.571       | Sult2a2                            | Metabolism                    |
| DHR1:97908301  | 1   | 97908301  | 97911700  | 3400   | 1         | 4.31E-05 | -1.5911984 | 6     | 0.176       |                                    |                               |
| DHR1:131705201 | 1   | 131705201 | 131705300 | 100    | 1         | 1.44E-05 | -2.3199386 | 0     | 0           |                                    |                               |
| DHR1:134971401 | 1   | 134971401 | 134971600 | 200    | 1         | 1.66E-06 | -2.4881538 | 4     | 2           |                                    |                               |
| DHR1:160585401 | 1   | 160585401 | 160585600 | 200    | 1         | 4.40E-05 | -2.2974865 | 2     | 1           |                                    |                               |
| DHR1:167880701 | 1   | 167880701 | 167880800 | 100    | 1         | 4.30E-06 | -2.6218214 | 1     | 1           | Olr63;Olr62;Olr61                  | Receptor                      |
| DHR1:180221701 | 1   | 180221701 | 180222800 | 1100   | 1         | 6.64E-05 | -1.9938922 | 9     | 0.818       |                                    |                               |
| DHR1:223728801 | 1   | 223728801 | 223729700 | 900    | 1         | 9.59E-06 | -1.9019606 | 14    | 1.556       |                                    |                               |
| DHR1:225258501 | 1   | 225258501 | 225258800 | 300    | 1         | 5.19E-07 | -1.8567607 | 0     | 0           |                                    |                               |
| DHR1:238948401 | 1   | 238948401 | 238948700 | 300    | 1         | 6.94E-05 | 1.8475241  | 1     | 0.333       |                                    |                               |
| DHR1:258851201 | 1   | 258851201 | 258851600 | 400    | 1         | 1.07E-05 | -2.6876411 | 9     | 2.25        | Cyp2c13                            |                               |
| DHR1:260287001 | 1   | 260287001 | 260287200 | 200    | 1         | 5.97E-05 | -2.3772843 | 0     | 0           | Dntt                               | Transcription                 |
| DHR2:12367201  | 2   | 12367201  | 12367600  | 400    | 1         | 1.33E-05 | 1.7841279  | 6     | 1.5         |                                    |                               |
| DHR2:12618901  | 2   | 12618901  | 12619300  | 400    | 1         | 9.95E-05 | -1.8406365 | 3     | 0.75        |                                    |                               |
| DHR2:49363601  | 2   | 49363601  | 49365800  | 2200   | 1         | 4.76E-05 | 0.6192282  | 65    | 2.955       |                                    |                               |
| DHR2:59409601  | 2   | 59409601  | 59409900  | 300    | 1         | 2.42E-05 | 1.8048096  | 1     | 0.333       |                                    |                               |
| DHR2:108675301 | 2   | 108675301 | 108676100 | 800    | 1         | 6.55E-05 | 1.8958809  | 5     | 0.625       |                                    |                               |
| DHR2:158807001 | 2   | 158807001 | 158807100 | 100    | 1         | 1.30E-05 | -2.5486889 | 0     | 0           |                                    |                               |
| DHR2:161780901 | 2   | 161780901 | 161783700 | 2800   | 1         | 5.77E-05 | -1.9621769 | 30    | 1.071       |                                    |                               |
| DHR2:196762701 | 2   | 196762701 | 196762900 | 200    | 1         | 1.01E-05 | -2.7712662 | 2     | 1           |                                    |                               |
| DHR3:12674201  | 3   | 12674201  | 12674500  | 300    | 1         | 1.74E-06 | -1.8728781 | 1     | 0.333       | Lmx1b                              |                               |
| DHR3:37775101  | 3   | 37775101  | 37776100  | 1000   | 1         | 8.36E-06 | 1.8202892  | 13    | 1.3         | Neb                                | Cytoskeleton                  |
| DHR3:116843301 | 3   | 116843301 | 116843500 | 200    | 1         | 4.16E-06 | -2.2138802 | 0     | 0           |                                    |                               |
| DHR3:131624601 | 3   | 131624601 | 131624900 | 300    | 1         | 5.37E-05 | 1.8863134  | 3     | 1           | AABR07053870.1                     |                               |
| DHR3:149735001 | 3   | 149735001 | 149735500 | 500    | 2         | 2.98E-07 | 1.9182096  | 9     | 1.8         | Cdk5rap1;AABR07054355.1            | Signaling                     |
| DHR3:149794201 | 3   | 149794201 | 149795200 | 1000   | 1         | 9.07E-06 | -2.7577954 | 9     | 0.9         | Cdk5rap1;AABR07054358.1; LOC690507 | Signaling                     |
| DHR4:26607801  | 4   | 26607801  | 26608300  | 500    | 1         | 2.23E-05 | -2.0307522 | 5     | 1           | RF00026                            |                               |
| DHR4:28386901  | 4   | 28386901  | 28387400  | 500    | 1         | 7.43E-05 | 1.6284818  | 4     | 0.8         |                                    |                               |
| DHR4:28391701  | 4   | 28391701  | 28392400  | 700    | 1         | 8.59E-06 | 2.0381995  | 7     | 1           |                                    |                               |
| DHR4:32793901  | 4   | 32793901  | 32794800  | 900    | 1         | 7.43E-05 | -1.6292826 | 3     | 0.333       |                                    |                               |
| DHR4:44708001  | 4   | 44708001  | 44708300  | 300    | 2         | 2.83E-12 | -1.7426474 | 3     | 1           |                                    |                               |
| DHR4:93679701  | 4   | 93679701  | 93680400  | 700    | 1         | 4.78E-05 | 1.6275584  | 6     | 0.857       |                                    |                               |
| DHR4:100449901 | 4   | 100449901 | 100450900 | 1000   | 1         | 8.05E-05 | -1.8578187 | 38    | 3.8         | Elmod3                             | Signaling                     |
| DHR4:125210301 | 4   | 125210301 | 125212700 | 2400   | 1         | 7.59E-05 | 1.3512611  | 24    | 1           | AABR07061448.2                     |                               |
| DHR4:135083301 | 4   | 135083301 | 135083500 | 200    | 1         | 8.88E-05 | -1.2257082 | 0     | 0           |                                    |                               |
| DHR4:178495701 | 4   | 178495701 | 178495800 | 100    | 1         | 3.64E-05 | -1.9911243 | 1     | 1           |                                    |                               |
| DHR5:27854301  | 5   | 27854301  | 27854400  | 100    | 1         | 2.56E-05 | 1.9682808  | 4     | 4           |                                    |                               |
| DHR5:28043301  | 5   | 28043301  | 28044800  | 1500   | 1         | 1.91E-06 | 2.2829492  | 15    | 1           | Slc26a7                            | Transport                     |
| DHR5:78023201  | 5   | 78023201  | 78023300  | 100    | 1         | 1.40E-06 | -3.0736551 | 0     | 0           |                                    |                               |
| DHR5:134445601 | 5   | 134445601 | 134448000 | 2400   | 1         | 6.64E-05 | -1.9937499 | 24    | 1           | AABR07049728.1                     |                               |
| DHR6:30537701  | 6   | 30537701  | 30538000  | 300    | 1         | 1.33E-05 | -1.700973  | 0     | 0           |                                    |                               |
| DHR6:42044401  | 6   | 42044401  | 42044500  | 100    | 1         | 1.21E-05 | 2.4511627  | 1     | 1           |                                    |                               |
| DHR6:78309601  | 6   | 78309601  | 78309900  | 300    | 1         | 6.24E-05 | -2.0880005 | 4     | 1.333       | Mipol1                             |                               |
| DHR6:87036801  | 6   | 87036801  | 87038900  | 2100   | 1         | 7.09E-05 | -2.2838552 | 16    | 0.762       |                                    |                               |
| DHR7:16532901  | 7   | 16532901  | 16533300  | 400    | 1         | 3.99E-05 | -1.5269855 | 4     | 1           |                                    |                               |
| DHR7:33896801  | 7   | 33896801  | 33898000  | 1200   | 1         | 4.00E-06 | 2.337549   | 9     | 0.75        | AABR07056636.1                     |                               |
| DHR7:38339401  | 7   | 38339401  | 38339500  | 100    | 1         | 1.47E-05 | -2.6568028 | 0     | 0           |                                    |                               |
| DHR7:45685501  | 7   | 45685501  | 45687500  | 2000   | 1         | 2.52E-05 | -1.8721533 | 18    | 0.9         |                                    |                               |
| DHR7:67916001  | 7   | 67916001  | 67916500  | 500    | 1         | 4.31E-05 | -1.8213576 | 6     | 1.2         |                                    |                               |
| DHR7:73275901  | 7   | 73275901  | 73276000  | 100    | 1         | 6.97E-07 | 3.1685492  | 0     | 0           | Rida;Pop1                          | Transcription                 |
| DHR8:3587801   | 8   | 3587801   | 3588000   | 200    | 1         | 8.80E-05 | 1.638857   | 2     | 1           |                                    |                               |
| DHR8:10734401  | 8   | 10734401  | 10735800  | 1400   | 1         | 9.66E-05 | 1.5569696  | 4     | 0.286       |                                    |                               |
| DHR8:37950701  | 8   | 37950701  | 37951400  | 700    | 1         | 5.17E-05 | 1.5269385  | 3     | 0.429       |                                    |                               |
| DHR8:39893001  | 8   | 39893001  | 39893300  | 300    | 3         | 1.33E-19 | 2.080174   | 0     | 0           | LOC100911068;Robo3                 | Extracellular Matrix;Receptor |
| DHR8:41655301  | 8   | 41655301  | 41655700  | 400    | 1         | 8.27E-05 | -1.7079149 | 2     | 0.5         | Rup2                               |                               |

|                 |    |           |           |      |   |          |            |    |       |                      |                    |
|-----------------|----|-----------|-----------|------|---|----------|------------|----|-------|----------------------|--------------------|
| DHR8:72483501   | 8  | 72483501  | 72484600  | 1100 | 1 | 3.64E-05 | 1.7547114  | 6  | 0.545 | Aph1b                | Development        |
| DHR9:20437301   | 9  | 20437301  | 20437600  | 300  | 1 | 4.65E-05 | -1.1204111 | 0  | 0     |                      |                    |
| DHR9:105968401  | 9  | 105968401 | 105968600 | 200  | 1 | 2.56E-05 | 2.1483278  | 1  | 0.5   |                      |                    |
| DHR9:110161501  | 9  | 110161501 | 110161600 | 100  | 1 | 5.77E-05 | -1.9622576 | 0  | 0     | Efna5                | Signaling          |
| DHR10:53942501  | 10 | 53942501  | 53942700  | 200  | 1 | 1.63E-05 | -1.5690821 | 0  | 0     |                      |                    |
| DHR11:198401    | 11 | 198401    | 198800    | 400  | 1 | 7.02E-05 | -2.1697969 | 2  | 0.5   |                      |                    |
| DHR11:6396501   | 11 | 6396501   | 6397600   | 1100 | 1 | 5.37E-05 | -2.9538565 | 20 | 1.818 |                      |                    |
| DHR11:38057601  | 11 | 38057601  | 38058500  | 900  | 1 | 7.24E-05 | -1.8916971 | 9  | 1     | Mx2;Tmprss2          | Immune;Proteolysis |
| DHR12:35746301  | 12 | 35746301  | 35746800  | 500  | 1 | 3.54E-05 | -2.039584  | 9  | 1.8   |                      |                    |
| DHR13:3384801   | 13 | 3384801   | 3385200   | 400  | 1 | 6.94E-05 | -1.9274597 | 3  | 0.75  |                      |                    |
| DHR13:16033201  | 13 | 16033201  | 16034100  | 900  | 1 | 6.31E-05 | 1.4493363  | 8  | 0.889 |                      |                    |
| DHR13:33487801  | 13 | 33487801  | 33489800  | 2000 | 1 | 1.14E-05 | -0.494969  | 53 | 2.65  |                      |                    |
| DHR13:101476501 | 13 | 101476501 | 101476700 | 200  | 1 | 1.28E-06 | 1.9241445  | 16 | 8     | Disp1                |                    |
| DHR14:22408401  | 14 | 22408401  | 22411600  | 3200 | 1 | 5.86E-05 | 1.6268693  | 15 | 0.469 | Ugt2a3;Ugt2b37       | Metabolism         |
| DHR15:34888101  | 15 | 34888101  | 34888200  | 100  | 1 | 8.76E-05 | 1.62955    | 0  | 0     | Mcpt2;AABR07017936.1 | Proteolysis        |
| DHR16:37022901  | 16 | 37022901  | 37023400  | 500  | 1 | 3.07E-05 | -1.5786096 | 0  | 0     |                      |                    |
| DHR17:86241401  | 17 | 86241401  | 86241600  | 200  | 1 | 5.53E-05 | -1.0016623 | 0  | 0     | AABR07028785.1       |                    |
| DHR17:89389201  | 17 | 89389201  | 89396900  | 7700 | 1 | 9.91E-05 | 0.4289181  | 62 | 0.805 |                      |                    |
| DHR18:8870301   | 18 | 8870301   | 8871400   | 1100 | 1 | 3.35E-05 | -2.047159  | 6  | 0.545 |                      |                    |
| DHR18:11161801  | 18 | 11161801  | 11162000  | 200  | 1 | 1.07E-05 | 2.0333672  | 2  | 1     |                      |                    |
| DHR18:80520201  | 18 | 80520201  | 80520400  | 200  | 2 | 1.22E-10 | -2.7783409 | 2  | 1     |                      |                    |
| DHR19:306701    | 19 | 306701    | 308000    | 1300 | 1 | 5.29E-05 | 0.6279511  | 8  | 0.615 |                      |                    |
| DHR19:15046701  | 19 | 15046701  | 15048400  | 1700 | 2 | 7.32E-05 | -1.0542571 | 49 | 2.882 | Ces1d                | Metabolism         |
| DHRX:17125301   | X  | 17125301  | 17125400  | 100  | 1 | 7.09E-05 | -2.0343452 | 0  | 0     |                      |                    |
| DHRX:18091601   | X  | 18091601  | 18094100  | 2500 | 1 | 5.28E-05 | 1.708749   | 85 | 3.4   | AABR07037302.1       |                    |
| DHRX:26739301   | X  | 26739301  | 26739400  | 100  | 1 | 3.16E-06 | -2.5193948 | 0  | 0     |                      |                    |
| DHRX:63460301   | X  | 63460301  | 63463000  | 2700 | 2 | 3.42E-05 | -2.2485931 | 37 | 1.37  | AABR07038886.2       |                    |
| DHRX:91909001   | X  | 91909001  | 91909200  | 200  | 2 | 7.64E-06 | -1.6889994 | 0  | 0     |                      |                    |
| DHRX:111113901  | X  | 111113901 | 111114100 | 200  | 1 | 6.94E-05 | -2.1400902 | 2  | 1     | Cldn2                | Cytoskeleton       |
| DHRX:131186601  | X  | 131186601 | 131187000 | 400  | 1 | 9.20E-06 | -1.8831736 | 0  | 0     |                      |                    |
| DHRX:150418201  | X  | 150418201 | 150419900 | 1700 | 1 | 5.11E-05 | -2.2841351 | 3  | 0.176 |                      |                    |
| DHRX:152735801  | X  | 152735801 | 152736000 | 200  | 1 | 7.45E-05 | 2.0251727  | 2  | 1     |                      |                    |

## (E) Vinclozolin H3K27me Cauda DHR List

| DHR Name        | Chr | Start     | Stop      | Length | # Sig Win | minP     | maxLFC     | CpG # | CpG Density | Gene Annotation                                             | Gene Category                 |
|-----------------|-----|-----------|-----------|--------|-----------|----------|------------|-------|-------------|-------------------------------------------------------------|-------------------------------|
| DHR1:11924201   | 1   | 11924201  | 11930900  | 6700   | 4         | 1.72E-06 | 1.012934   | 99    | 1.478       | RF01518                                                     |                               |
| DHR1:36748301   | 1   | 36748301  | 36750500  | 2200   | 2         | 9.18E-06 | -1.0379509 | 68    | 3.091       |                                                             |                               |
| DHR1:38956501   | 1   | 38956501  | 38956700  | 200    | 1         | 2.75E-05 | 1.990229   | 2     | 1           | AABR07001233.1                                              |                               |
| DHR1:53670601   | 1   | 53670601  | 53670900  | 300    | 1         | 5.74E-05 | 1.5124603  | 1     | 0.333       |                                                             |                               |
| DHR1:55729501   | 1   | 55729501  | 55730400  | 900    | 1         | 1.00E-04 | 0.6446577  | 22    | 2.444       | AABR07001734.1                                              |                               |
| DHR1:148469801  | 1   | 148469801 | 148470500 | 700    | 3         | 1.81E-09 | -1.1689159 | 8     | 1.143       |                                                             |                               |
| DHR1:148626701  | 1   | 148626701 | 148627500 | 800    | 1         | 4.87E-05 | -0.9804167 | 11    | 1.375       |                                                             |                               |
| DHR1:148632701  | 1   | 148632701 | 148633700 | 1000   | 4         | 4.22E-08 | -1.1698118 | 10    | 1           |                                                             |                               |
| DHR1:148652001  | 1   | 148652001 | 148653300 | 1300   | 2         | 2.83E-05 | -1.0923662 | 25    | 1.923       |                                                             |                               |
| DHR1:159567001  | 1   | 159567001 | 159567500 | 500    | 1         | 6.54E-05 | -1.4492069 | 4     | 0.8         |                                                             |                               |
| DHR1:180910101  | 1   | 180910101 | 180912000 | 1900   | 1         | 8.77E-05 | 1.345745   | 45    | 2.368       |                                                             |                               |
| DHR2:49370601   | 2   | 49370601  | 49371000  | 400    | 2         | 1.71E-07 | -0.9532665 | 11    | 2.75        |                                                             |                               |
| DHR2:74318001   | 2   | 74318001  | 74318800  | 800    | 1         | 1.52E-05 | -2.2132114 | 6     | 0.75        | RF00560                                                     |                               |
| DHR2:80429901   | 2   | 80429901  | 80430400  | 500    | 1         | 5.41E-05 | -1.1589134 | 2     | 0.4         |                                                             |                               |
| DHR2:160890001  | 2   | 160890001 | 160891700 | 1700   | 2         | 1.47E-06 | 0.8647259  | 20    | 1.176       |                                                             |                               |
| DHR2:160933401  | 2   | 160933401 | 160934200 | 800    | 1         | 3.83E-05 | 0.6932213  | 5     | 0.625       |                                                             |                               |
| DHR2:197168901  | 2   | 197168901 | 197169200 | 300    | 1         | 7.06E-05 | 1.392034   | 2     | 0.667       |                                                             |                               |
| DHR3:20524201   | 3   | 20524201  | 20524400  | 200    | 1         | 9.00E-06 | -2.2558636 | 0     | 0           | AABR07051735.1                                              |                               |
| DHR3:25592801   | 3   | 25592801  | 25593500  | 700    | 1         | 6.90E-05 | -2.0071134 | 9     | 1.286       |                                                             |                               |
| DHR3:133659701  | 3   | 133659701 | 133659800 | 100    | 1         | 4.21E-05 | 2.1233056  | 0     | 0           |                                                             |                               |
| DHR3:149735001  | 3   | 149735001 | 149735500 | 500    | 1         | 3.61E-05 | 1.8767362  | 9     | 1.8         | Cdk5rap1;AABR07054355.1                                     | Signaling                     |
| DHR3:149856501  | 3   | 149856501 | 149856700 | 200    | 1         | 1.21E-06 | -1.4187899 | 8     | 4           | Cdk5rap1                                                    | Signaling                     |
| DHR4:29649101   | 4   | 29649101  | 29650400  | 1300   | 1         | 1.11E-07 | -1.3211625 | 4     | 0.308       | Casd1                                                       |                               |
| DHR4:77446601   | 4   | 77446601  | 77453300  | 6700   | 4         | 1.18E-05 | -0.6432391 | 226   | 3.373       | AABR07060519.1;RF00019                                      |                               |
| DHR4:96103101   | 4   | 96103101  | 96105600  | 2500   | 2         | 9.14E-09 | -2.5869223 | 19    | 0.76        |                                                             |                               |
| DHR4:114548401  | 4   | 114548401 | 114548600 | 200    | 1         | 2.56E-05 | -2.0936515 | 3     | 1.5         |                                                             |                               |
| DHR4:132936401  | 4   | 132936401 | 132937300 | 900    | 3         | 1.37E-06 | -1.4074774 | 4     | 0.444       |                                                             |                               |
| DHR4:146538701  | 4   | 146538701 | 146548900 | 10200  | 64        | 6.68E-12 | -1.5061998 | 299   | 2.931       |                                                             |                               |
| DHR4:146550201  | 4   | 146550201 | 146551400 | 1200   | 1         | 2.57E-06 | -0.6944349 | 29    | 2.417       |                                                             |                               |
| DHR4:146561001  | 4   | 146561001 | 146563400 | 2400   | 3         | 1.12E-06 | -1.301875  | 63    | 2.625       |                                                             |                               |
| DHR5:6372701    | 5   | 6372701   | 6374600   | 1900   | 17        | 1.39E-16 | -2.7065932 | 33    | 1.737       | AABR07046778.1                                              |                               |
| DHR5:106596201  | 5   | 106596201 | 106596700 | 500    | 1         | 5.58E-06 | -2.0830772 | 3     | 0.6         | Focad                                                       |                               |
| DHR5:107131801  | 5   | 107131801 | 107133000 | 1200   | 2         | 9.00E-06 | -2.2558585 | 7     | 0.583       |                                                             |                               |
| DHR5:146403201  | 5   | 146403201 | 146406100 | 2900   | 18        | 1.05E-12 | -2.8586406 | 7     | 0.241       | Csmd2                                                       | Unknown                       |
| DHR6:4208501    | 6   | 4208501   | 4208900   | 400    | 1         | 9.00E-05 | -0.6486448 | 0     | 0           |                                                             |                               |
| DHR6:10806201   | 6   | 10806201  | 10809300  | 3100   | 1         | 4.25E-05 | -1.6267457 | 128   | 4.129       |                                                             |                               |
| DHR6:30646401   | 6   | 30646401  | 30647800  | 1400   | 1         | 8.65E-05 | 0.9208162  | 15    | 1.071       | AABR07063424.1;AABR07063425.3;AABR07063425.2;AABR07063425.1 |                               |
| DHR6:31053801   | 6   | 31053801  | 31061400  | 7600   | 6         | 3.89E-08 | 1.0387415  | 108   | 1.421       | AABR07063462.1                                              |                               |
| DHR6:138199401  | 6   | 138199401 | 138200000 | 600    | 1         | 1.54E-05 | -2.1350597 | 2     | 0.333       | lghm                                                        |                               |
| DHR7:27563101   | 7   | 27563101  | 27563700  | 600    | 4         | 5.58E-10 | -0.8072242 | 4     | 0.667       |                                                             |                               |
| DHR7:27579201   | 7   | 27579201  | 27579600  | 400    | 1         | 7.88E-07 | -0.6121506 | 4     | 1           |                                                             |                               |
| DHR7:106327901  | 7   | 106327901 | 106328000 | 100    | 1         | 2.54E-05 | -2.1693107 | 2     | 2           |                                                             |                               |
| DHR8:181301     | 8   | 181301    | 182300    | 1000   | 6         | 5.92E-09 | -2.9050307 | 23    | 2.3         |                                                             |                               |
| DHR8:15593801   | 8   | 15593801  | 15598600  | 4800   | 1         | 5.86E-05 | 0.7755924  | 70    | 1.458       |                                                             |                               |
| DHR8:39893001   | 8   | 39893001  | 39893300  | 300    | 1         | 7.54E-06 | 1.3491164  | 0     | 0           | LOC100911068;Robo3                                          | Extracellular Matrix;Receptor |
| DHR8:40843801   | 8   | 40843801  | 40845100  | 1300   | 1         | 3.64E-05 | 1.1761534  | 7     | 0.538       | AABR07069816.1                                              |                               |
| DHR9:8405501    | 9   | 8405501   | 8407100   | 1600   | 1         | 7.75E-05 | -1.9997786 | 4     | 0.25        | AABR07066379.1                                              |                               |
| DHR9:40516001   | 9   | 40516001  | 40518400  | 2400   | 9         | 3.66E-10 | -1.2170326 | 14    | 0.583       |                                                             |                               |
| DHR9:40522201   | 9   | 40522201  | 40522800  | 600    | 2         | 1.16E-06 | -1.1395896 | 3     | 0.5         |                                                             |                               |
| DHR9:119866801  | 9   | 119866801 | 119867000 | 200    | 1         | 6.97E-05 | 1.2811412  | 7     | 3.5         | Mettl4;Ndc80                                                | Epigenetic;Transcription      |
| DHR10:44825101  | 10  | 44825101  | 44825800  | 700    | 2         | 4.02E-06 | -0.7923615 | 14    | 2           |                                                             |                               |
| DHR10:75365301  | 10  | 75365301  | 75365400  | 100    | 1         | 3.65E-07 | -2.4881398 | 0     | 0           | Vezf1                                                       | Transcription                 |
| DHR10:110051401 | 10  | 110051401 | 110051600 | 200    | 1         | 6.75E-05 | -2.1362662 | 0     | 0           | Ccdc57                                                      | Unknown                       |
| DHR11:31012201  | 11  | 31012201  | 31012500  | 300    | 1         | 7.56E-05 | -0.8971057 | 0     | 0           | Eva1c                                                       | Unknown                       |
| DHR11:71268601  | 11  | 71268601  | 71268700  | 100    | 1         | 6.90E-05 | -2.0071156 | 1     | 1           | AABR07034428.1                                              |                               |
| DHR12:38201     | 12  | 38201     | 39100     | 900    | 1         | 5.09E-05 | 1.5265742  | 15    | 1.667       |                                                             |                               |
| DHR12:50001     | 12  | 50001     | 51700     | 1700   | 1         | 3.18E-05 | 1.7489022  | 14    | 0.824       | AABR07034833.1;AABR07034833.2                               |                               |
| DHR12:104401    | 12  | 104401    | 106900    | 2500   | 1         | 3.41E-05 | 1.1759492  | 11    | 0.44        |                                                             |                               |
| DHR12:9530301   | 12  | 9530301   | 9534100   | 3800   | 8         | 2.49E-10 | -1.7048173 | 9     | 0.237       |                                                             |                               |

|                 |    |           |           |       |     |          |            |     |       |                                                                                                                                                                                                                                                                                                                                                                                     |               |  |
|-----------------|----|-----------|-----------|-------|-----|----------|------------|-----|-------|-------------------------------------------------------------------------------------------------------------------------------------------------------------------------------------------------------------------------------------------------------------------------------------------------------------------------------------------------------------------------------------|---------------|--|
| DHR12:9535201   | 12 | 9535201   | 9550400   | 15200 | 63  | 1.23E-12 | -2.8988306 | 49  | 0.322 |                                                                                                                                                                                                                                                                                                                                                                                     |               |  |
| DHR12:10456301  | 12 | 10456301  | 10457100  | 800   | 3   | 4.03E-07 | -1.6436451 | 4   | 0.5   |                                                                                                                                                                                                                                                                                                                                                                                     |               |  |
| DHR13:33726401  | 13 | 33726401  | 33728500  | 2100  | 1   | 1.24E-05 | 0.7020146  | 49  | 2.333 |                                                                                                                                                                                                                                                                                                                                                                                     |               |  |
| DHR13:84656301  | 13 | 84656301  | 84656400  | 100   | 1   | 6.60E-05 | -1.9478541 | 2   | 2     |                                                                                                                                                                                                                                                                                                                                                                                     |               |  |
| DHR14:46528801  | 14 | 46528801  | 46535500  | 6700  | 2   | 3.48E-05 | 0.8456106  | 114 | 1.701 | AABR07015055.1;AABR07015057.1;AABR07015055.2;AABR07015056.1                                                                                                                                                                                                                                                                                                                         |               |  |
| DHR14:46593201  | 14 | 46593201  | 46610100  | 16900 | 5   | 2.33E-07 | 0.8177238  | 278 | 1.645 | AABR07015066.1;AABR07015067.1;AABR07015067.2                                                                                                                                                                                                                                                                                                                                        |               |  |
| DHR14:46657001  | 14 | 46657001  | 46662000  | 5000  | 3   | 1.73E-05 | 0.9918783  | 93  | 1.86  | AABR07015078.1;AABR07015078.2;AABR07015079.1;AABR07015080.2;AABR07015081.2;AABR07015080.1;AABR07015081.1                                                                                                                                                                                                                                                                            |               |  |
| DHR14:48427401  | 14 | 48427401  | 48427800  | 400   | 1   | 1.84E-05 | 1.1188707  | 9   | 2.25  |                                                                                                                                                                                                                                                                                                                                                                                     |               |  |
| DHR14:80323901  | 14 | 80323901  | 80327400  | 3500  | 2   | 1.79E-06 | -1.3476111 | 42  | 1.2   | Acox3                                                                                                                                                                                                                                                                                                                                                                               | Metabolism    |  |
| DHR14:101989501 | 14 | 101989501 | 101993200 | 3700  | 3   | 1.69E-08 | 1.32186    | 62  | 1.676 |                                                                                                                                                                                                                                                                                                                                                                                     |               |  |
| DHR14:101994201 | 14 | 101994201 | 101994500 | 300   | 1   | 8.05E-06 | 1.3322268  | 3   | 1     |                                                                                                                                                                                                                                                                                                                                                                                     |               |  |
| DHR14:102070201 | 14 | 102070201 | 102072100 | 1900  | 1   | 6.93E-05 | 0.9083906  | 22  | 1.158 |                                                                                                                                                                                                                                                                                                                                                                                     |               |  |
| DHR15:22214001  | 15 | 22214001  | 22216000  | 2000  | 1   | 1.97E-05 | 1.5412783  | 30  | 1.5   |                                                                                                                                                                                                                                                                                                                                                                                     |               |  |
| DHR15:22347101  | 15 | 22347101  | 22348700  | 1600  | 1   | 7.62E-05 | 0.6810973  | 17  | 1.062 |                                                                                                                                                                                                                                                                                                                                                                                     |               |  |
| DHR16:63201     | 16 | 63201     | 64100     | 900   | 1   | 5.72E-07 | -1.7882113 | 3   | 0.333 | AABR07024441.1                                                                                                                                                                                                                                                                                                                                                                      |               |  |
| DHR16:64912701  | 16 | 64912701  | 64913900  | 1200  | 1   | 3.78E-05 | 1.6163532  | 8   | 0.667 | AABR07026120.1                                                                                                                                                                                                                                                                                                                                                                      |               |  |
| DHR16:80784601  | 16 | 80784601  | 80784800  | 200   | 1   | 3.34E-06 | -1.5322023 | 0   | 0     | Fbxo25                                                                                                                                                                                                                                                                                                                                                                              |               |  |
| DHR17:44233601  | 17 | 44233601  | 44234400  | 800   | 1   | 6.93E-05 | 0.8711112  | 12  | 1.5   |                                                                                                                                                                                                                                                                                                                                                                                     |               |  |
| DHR17:86241401  | 17 | 86241401  | 86241600  | 200   | 1   | 8.96E-08 | -1.9609257 | 0   | 0     | AABR07028785.1                                                                                                                                                                                                                                                                                                                                                                      |               |  |
| DHR17:89445001  | 17 | 89445001  | 89446200  | 1200  | 1   | 8.82E-05 | 0.9444518  | 7   | 0.583 | AABR07028872.1                                                                                                                                                                                                                                                                                                                                                                      |               |  |
| DHR18:80520201  | 18 | 80520201  | 80520400  | 200   | 2   | 4.32E-09 | -3.1614705 | 2   | 1     |                                                                                                                                                                                                                                                                                                                                                                                     |               |  |
| DHR19:56336401  | 19 | 56336401  | 56336600  | 200   | 2   | 1.86E-05 | -0.8735126 | 13  | 6.5   | Gas8;RF00001                                                                                                                                                                                                                                                                                                                                                                        | Cell Cycle    |  |
| DHR19:56337601  | 19 | 56337601  | 56339400  | 1800  | 16  | 2.75E-14 | -0.759682  | 88  | 4.889 | Gas8;RF00001                                                                                                                                                                                                                                                                                                                                                                        | Cell Cycle    |  |
| DHR20:4931901   | 20 | 4931901   | 4933900   | 2000  | 1   | 3.32E-05 | -1.8146187 | 11  | 0.55  | RT1-CE1;RT1-CE4;AABR07044408.1;RT1-CE3                                                                                                                                                                                                                                                                                                                                              | Immune        |  |
| DHR20:5355301   | 20 | 5355301   | 5355600   | 300   | 1   | 6.32E-05 | -1.2879578 | 2   | 0.667 | AABR07044420.1;AABR07044420.2;RT1-A1;AABR07044421.1                                                                                                                                                                                                                                                                                                                                 | Immune        |  |
| DHR20:19484001  | 20 | 19484001  | 19485200  | 1200  | 12  | 1.52E-17 | -3.1742864 | 14  | 1.167 | Fam13c                                                                                                                                                                                                                                                                                                                                                                              |               |  |
| DHR20:45349401  | 20 | 45349401  | 45349900  | 500   | 2   | 3.66E-10 | -1.1973384 | 1   | 0.2   | Rpf2;RF00411;Gtf3c6;RF00012;RF01848                                                                                                                                                                                                                                                                                                                                                 | Transcription |  |
| DHRMT:1         | MT | 1         | 16300     | 16300 | 162 | 4.80E-26 | -2.8406793 | 303 | 1.859 | AY172581.13;AY172581.9;AY172581.3;AY172581.24;AY172581.14;Mt-nd1;AY172581.4;AY172581.21;AY172581.15;Mt-nd2;AY172581.6;AY172581.22;AY172581.18;AY172581.10;AY172581.7;Mt-co1;AY172581.19;AY172581.12;Mt-co2;AY172581.1;Mt-atp8;Mt-atp6;Mt-co3;AY172581.5;Mt-nd3;AY172581.16;Mt-nd4;Mt-nd4;AY172581.23;AY172581.17;AY172581.11;Mt-nd5;Mt-nd6;AY172581.20;Mt-cyb;AY172581.8;AY172581.2 |               |  |
| DHRX:14951701   | X  | 14951701  | 14955600  | 3900  | 7   | 7.02E-08 | -2.0790603 | 20  | 0.513 | RF00568;Slc38a5                                                                                                                                                                                                                                                                                                                                                                     | Unknown       |  |
| DHRX:35262701   | X  | 35262701  | 35265700  | 3000  | 1   | 9.45E-05 | -1.014857  | 17  | 0.567 |                                                                                                                                                                                                                                                                                                                                                                                     |               |  |
| DHRX:35267301   | X  | 35267301  | 35267800  | 500   | 1   | 3.47E-05 | -1.1799021 | 6   | 1.2   |                                                                                                                                                                                                                                                                                                                                                                                     |               |  |
| DHRX:106167301  | X  | 106167301 | 106168800 | 1500  | 2   | 4.89E-06 | -1.1310342 | 12  | 0.8   |                                                                                                                                                                                                                                                                                                                                                                                     |               |  |
| DHRX:106172201  | X  | 106172201 | 106174500 | 2300  | 3   | 7.82E-06 | -1.3015973 | 11  | 0.478 |                                                                                                                                                                                                                                                                                                                                                                                     |               |  |
| DHRX:106175901  | X  | 106175901 | 106180500 | 4600  | 6   | 1.33E-11 | -1.3590641 | 27  | 0.587 |                                                                                                                                                                                                                                                                                                                                                                                     |               |  |
| DHRY:1849101    | Y  | 1849101   | 1850300   | 1200  | 1   | 6.76E-06 | 0.753775   | 41  | 3.417 |                                                                                                                                                                                                                                                                                                                                                                                     |               |  |
